# Supplementary material for: Conjugate acene fused buckybowls: evaluating their suitability for p-type, ambipolar and n-type air stable organic semiconductors
Source: Royal Society of Chemistry journal article supplement (doi:10.1039/c3cp44673e), 2013-01-01
Supplement: Addition.pdf [file Addition.pdf]

# Conjugate Acene Fused Buckybowls: Evaluating Their Suitability for p-type, Ambipolar and n-type Air Stable Organic Semiconductors

Uppula Purushotham and G. Narahari Sastry\*

Manuscript ID: CP-ART-12-2012-044673 DOI: 10.1039/C3CP44673E

We have found typographical errors in the reorganization energy data in Table 3 and Figure 5. This effect the text as follows:

Page 5045, right column, line 20: “The  $\lambda_+$  values clustered in the range of 0.01 eV to 0.03 eV” is incorrect and should read “The  $\lambda_+$  values clustered in the range of 0.01 eV to 0.25eV”.

Page 5045, right column, line 22: “The  $\lambda_+$  values are lower in boron doped compounds by 0.08 eV to 0.18 eV compared to undoped bowls” is incorrect and should read “The  $\lambda_+$  values are lower in boron doped compounds by 0.02 eV to 0.11 eV compared to undoped bowls”. However, none of the changes mentioned here alter the concepts and interpretations of the results of the manuscript.

The Table 3 and Figure 5 should read as follows.

**Table 3:** Energies of HOMO, LUMO orbitals, HOMO-LUMO orbital energy gap (HLG) and reorganization energies  $\lambda_+$  (hole transport),  $\lambda_-$  (electron transport) of boron and nitrogen doped acene fused buckybowls at B3LYP/6-311+G(d)// B3LYP/6-31G level of theory (all values are given in eV).

| Str.         | HOMO  | LUMO  | HLG   | $\lambda_+$ | $\lambda_-$ |
|--------------|-------|-------|-------|-------------|-------------|
| Cor-B1-Cor-B | -5.17 | -4.90 | -0.27 | 0.08        | 0.19        |
| Cor-B2-Cor-B | -5.11 | -4.87 | -0.24 | 0.07        | 0.07        |
| Cor-B3-Cor-B | -5.06 | -4.83 | -0.23 | 0.05        | 0.04        |
| Cor-B4-Cor-B | -4.98 | -4.77 | -0.21 | 0.01        | 0.09        |
| Cor-B5-Cor-B | -4.93 | -4.73 | -0.20 | 0.08        | 0.06        |
| Sum-B1-Cor-B | -4.98 | -4.61 | -0.37 | 0.07        | 0.09        |
| Sum-B1-Sum-B | -4.81 | -4.35 | -0.46 | 0.07        | 0.08        |
| Sum-B2-Cor-B | -4.91 | -4.58 | -0.32 | 0.10        | 0.08        |
| Sum-B2-Sum-B | -4.73 | -4.33 | -0.40 | 0.07        | 0.07        |
| Sum-B3-Cor-B | -4.84 | -4.55 | -0.29 | 0.06        | 0.07        |
| Sum-B3-Sum-B | -4.67 | -4.31 | -0.36 | 0.06        | 0.06        |
| Sum-B4-Cor-B | -4.77 | -4.44 | -0.33 | 0.07        | 0.05        |
| Sum-B4-Sum-B | -4.61 | -4.29 | -0.32 | 0.06        | 0.06        |
| Sum-B5-Cor-B | -4.74 | -4.38 | -0.36 | 0.08        | 0.06        |
| Sum-B5-Sum-B | -4.55 | -4.27 | -0.28 | 0.06        | 0.10        |
| Cor-B1-Cor-N | -3.34 | -3.01 | -0.34 | 0.14        | 0.09        |
| Cor-B2-Cor-N | -3.34 | -3.05 | -0.29 | 0.12        | 0.06        |
| Cor-B3-Cor-N | -3.35 | -3.09 | -0.26 | 0.09        | 0.03        |
| Cor-B4-Cor-N | -3.38 | -3.14 | -0.24 | 0.10        | 0.03        |
| Cor-B5-Cor-N | -3.40 | -3.18 | -0.22 | 0.09        | 0.14        |
| Sum-B1-Cor-N | -3.13 | -2.71 | -0.42 | 0.25        | 0.22        |
| Sum-B1-Sum-N | -2.95 | -2.44 | -0.52 | 0.14        | 0.11        |
| Sum-B2-Cor-N | -3.15 | -2.77 | -0.38 | 0.14        | 0.11        |
| Sum-B2-Sum-N | -3.00 | -2.51 | -0.49 | 0.12        | 0.12        |
| Sum-B3-Cor-N | -3.19 | -2.83 | -0.36 | 0.10        | 0.06        |
| Sum-B3-Sum-N | -3.05 | -2.59 | -0.46 | 0.10        | 0.12        |
| Sum-B4-Cor-N | -3.30 | -2.91 | -0.39 | 0.09        | 0.14        |
| Sum-B4-Sum-N | -3.10 | -2.69 | -0.41 | 0.09        | 0.12        |
| Sum-B5-Cor-N | -3.25 | -2.93 | -0.31 | 0.07        | 0.09        |
| Sum-B5-Sum-N | -3.14 | -2.77 | -0.37 | 0.05        | 0.10        |

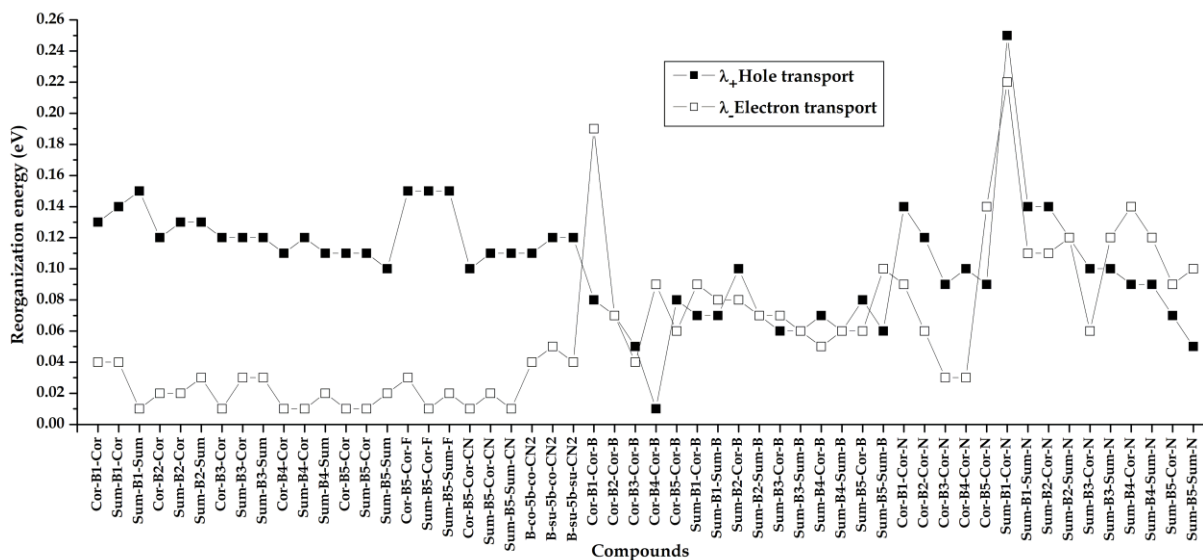

**Figure 5:** The reorganization energy, hole transport ( $\lambda_+$ ) and electron transport ( $\lambda_-$ ) of acene fused buckybowls and there boron and nitrogen doped bowls at B3LYP/6-311+G(d)//B3LYP/6-31G level of theory.
