# Supplementary material for: Conjugate acene fused buckybowls: evaluating their suitability for p-type, ambipolar and n-type air stable organic semiconductors
Source: Royal Society of Chemistry journal article supplement (doi:10.1039/c3cp44673e), 2013-01-01
Supplement: c3cp44673e.pdf [file c3cp44673e.pdf]

# **Conjugate Acene Fused Buckybowls: Evaluating Their Suitability for p-type, Ambipolar and n-type Air Stable Organic Semiconductors**

Uppula Purushotham and G. Narahari Sastry\*

Center for Molecular Modeling, Indian Institute of Chemical Technology, Tarnaka, Hyderabad  
500607, AP, India

E-mail: gnsastry@gmail.com

**Supporting information**  
(27 pages including this page)

**Table S1:** The optimized cartesian coordinates of acene fused bowls at B3LYP/6-31G level of theory.

**Table S1:** The optimized cartesian coordinates of acene fused bowls at B3LYP/6-31G level of theory.

| <b>Cor-A1-Cor</b> |   |           |           |           | <b>Sum-A1-Cor</b> |   |           |           |           |
|-------------------|---|-----------|-----------|-----------|-------------------|---|-----------|-----------|-----------|
| 6                 | 0 | -6.438473 | -0.486719 | -0.128168 | 6                 | 0 | 0.600892  | -0.115598 | -0.822730 |
| 6                 | 0 | -6.086058 | 0.854973  | -0.432821 | 6                 | 0 | -0.600757 | 0.112257  | -0.822474 |
| 6                 | 0 | -4.742799 | 0.861902  | -0.889431 |                   |   |           |           |           |
| 6                 | 0 | -4.262187 | -0.474448 | -0.867178 | 6                 | 0 | -5.485439 | -1.320988 | -0.345454 |
| 6                 | 0 | -5.312060 | -1.308546 | -0.397052 | 6                 | 0 | -6.595959 | -0.497992 | -0.019743 |
| 6                 | 0 | -7.413694 | -0.819724 | 0.800982  | 6                 | 0 | -6.260819 | 0.842310  | -0.349199 |
| 6                 | 0 | -6.684793 | 1.951050  | 0.172694  | 6                 | 0 | -4.944448 | 0.847071  | -0.878388 |
| 6                 | 0 | -3.907857 | 1.964349  | -0.770332 | 6                 | 0 | -4.462774 | -0.489003 | -0.875680 |
| 6                 | 0 | -2.924422 | -0.802670 | -0.730348 | 6                 | 0 | -5.227364 | -2.528062 | 0.288315  |
| 6                 | 0 | -5.088605 | -2.518631 | 0.243993  | 6                 | 0 | -7.519279 | -0.826712 | 0.962466  |
| 6                 | 0 | -8.191121 | 0.308522  | 1.280815  | 6                 | 0 | -6.826322 | 1.941060  | 0.282863  |
| 6                 | 0 | -7.844240 | 1.625955  | 0.982417  | 6                 | 0 | -4.104083 | 1.949597  | -0.808845 |
| 6                 | 0 | -5.899508 | 3.171090  | 0.108603  | 6                 | 0 | -3.119296 | -0.816264 | -0.808819 |
| 6                 | 0 | -4.580319 | 3.178706  | -0.340133 | 6                 | 0 | -6.294244 | -2.984408 | 1.161087  |
| 6                 | 0 | -2.004983 | 0.338219  | -0.831084 | 6                 | 0 | -7.383247 | -2.175503 | 1.482032  |
| 6                 | 0 | -2.499384 | 1.660414  | -0.845131 | 6                 | 0 | -8.269905 | 0.303598  | 1.478507  |
| 6                 | 0 | -2.678692 | -2.148841 | -0.255134 | 6                 | 0 | -7.939940 | 1.619642  | 1.155699  |
| 6                 | 0 | -3.709056 | -2.966617 | 0.207733  | 6                 | 0 | -6.045722 | 3.160587  | 0.171101  |
| 6                 | 0 | -6.201264 | -2.978799 | 1.055363  | 6                 | 0 | -4.752694 | 3.165771  | -0.348144 |
| 6                 | 0 | -7.306028 | -2.171040 | 1.320623  | 6                 | 0 | -2.848011 | -2.160182 | -0.341317 |
| 1                 | 0 | -9.016909 | 0.133112  | 1.964944  | 6                 | 0 | -3.851600 | -2.976112 | 0.179988  |
| 1                 | 0 | -8.412154 | 2.428313  | 1.445439  | 1                 | 0 | -6.204069 | -3.949896 | 1.651469  |
| 1                 | 0 | -6.317663 | 4.093955  | 0.501279  | 1                 | 0 | -8.102018 | -2.539891 | 2.211081  |
| 1                 | 0 | -4.017642 | 4.106250  | -0.281633 | 1                 | 0 | -9.057213 | 0.131203  | 2.207258  |
| 1                 | 0 | -1.654793 | -2.499771 | -0.173737 | 1                 | 0 | -8.482031 | 2.424170  | 1.645173  |
| 1                 | 0 | -3.450787 | -3.932035 | 0.634188  | 1                 | 0 | -6.442032 | 4.085287  | 0.581763  |
| 1                 | 0 | -6.137897 | -3.946600 | 1.545280  | 1                 | 0 | -4.187686 | 4.093368  | -0.323569 |
| 1                 | 0 | -8.063191 | -2.538724 | 2.007837  | 1                 | 0 | -1.820888 | -2.510195 | -0.313663 |
| 6                 | 0 | 2.005282  | -0.340577 | -0.831210 | 1                 | 0 | -3.570528 | -3.939500 | 0.596488  |
| 6                 | 0 | 2.500629  | -1.662430 | -0.844786 | 1                 | 0 | 8.184729  | -1.962216 | 2.374865  |
| 6                 | 0 | 2.923894  | 0.800993  | -0.730682 | 6                 | 0 | 7.565750  | -1.719145 | 1.515635  |
| 6                 | 0 | 3.909310  | -1.965352 | -0.769792 | 6                 | 0 | 6.760914  | -2.770289 | 0.958767  |
| 6                 | 0 | 4.261901  | 0.473672  | -0.867296 | 6                 | 0 | 7.436383  | -0.393470 | 1.073899  |
| 6                 | 0 | 2.677191  | 2.147136  | -0.255871 | 6                 | 0 | 5.818510  | -2.507161 | -0.046456 |
| 6                 | 0 | 4.743465  | -0.862340 | -0.889139 | 1                 | 0 | 6.816854  | -3.748453 | 1.428323  |
| 6                 | 0 | 4.582624  | -3.179107 | -0.339223 | 6                 | 0 | 7.711070  | 1.006842  | 1.709372  |
| 6                 | 0 | 5.311150  | 1.308643  | -0.397333 | 6                 | 0 | 6.584445  | -0.183954 | -0.021665 |
| 6                 | 0 | 3.706945  | 2.965766  | 0.206840  | 6                 | 0 | 4.497340  | -3.193397 | -0.519146 |
| 1                 | 0 | 1.653042  | 2.497377  | -0.174658 | 6                 | 0 | 5.806746  | -1.200207 | -0.560535 |
| 6                 | 0 | 6.086697  | -0.854324 | -0.432470 | 6                 | 0 | 6.642456  | 1.911358  | 1.016780  |
| 6                 | 0 | 5.901796  | -3.170430 | 0.109543  | 1                 | 0 | 8.735462  | 1.354579  | 1.515152  |
| 1                 | 0 | 4.020612  | -4.107039 | -0.280501 | 1                 | 0 | 7.578976  | 0.988226  | 2.796930  |
| 6                 | 0 | 6.438135  | 0.487699  | -0.128165 | 6                 | 0 | 6.116315  | 1.173108  | -0.055158 |
| 6                 | 0 | 5.086809  | 2.518760  | 0.243339  | 6                 | 0 | 3.657890  | -1.986375 | -1.046957 |
| 1                 | 0 | 3.447968  | 3.931130  | 0.632988  | 1                 | 0 | 4.678661  | -3.942595 | -1.302550 |
| 6                 | 0 | 6.686206  | -1.949809 | 0.173347  | 1                 | 0 | 3.990841  | -3.706355 | 0.305930  |
| 1                 | 0 | 6.320599  | -4.092892 | 0.502474  | 6                 | 0 | 4.536068  | -0.893730 | -1.149811 |
| 6                 | 0 | 7.413090  | 0.821665  | 0.800919  | 6                 | 0 | 5.921432  | 3.053520  | 1.397221  |
| 6                 | 0 | 6.199101  | 2.979947  | 1.054630  | 6                 | 0 | 4.886532  | 1.469551  | -0.625892 |
| 6                 | 0 | 7.845401  | -1.623658 | 0.983006  | 6                 | 0 | 4.081691  | 0.417272  | -1.182919 |
| 6                 | 0 | 7.304431  | 2.173052  | 1.320171  | 6                 | 0 | 4.648819  | 3.359480  | 0.807235  |
| 6                 | 0 | 8.191319  | -0.305893 | 1.281070  | 1                 | 0 | 6.246527  | 3.664327  | 2.234955  |
| 1                 | 0 | 6.135036  | 3.947848  | 1.544259  | 6                 | 0 | 4.082927  | 2.525951  | -0.169731 |
| 1                 | 0 | 8.413885  | -2.425477 | 1.446263  | 6                 | 0 | 2.723390  | 0.746001  | -1.119871 |
| 1                 | 0 | 8.061305  | 2.541485  | 2.007302  | 1                 | 0 | 4.083107  | 4.183945  | 1.232218  |
| 1                 | 0 | 9.016961  | -0.129711 | 1.965177  | 6                 | 0 | 2.626447  | 2.226403  | -0.645931 |
| 1                 | 0 | 1.774480  | -2.469469 | -0.827544 | 1                 | 0 | 2.303983  | 2.898946  | -1.453047 |
| 1                 | 0 | -1.772672 | 2.466950  | -0.828018 | 1                 | 0 | 1.900656  | 2.334673  | 0.167904  |

|   |   |           |           |           |
|---|---|-----------|-----------|-----------|
| 6 | 0 | -2.206155 | 0.323476  | -0.963373 |
| 6 | 0 | -2.701523 | 1.645450  | -0.957385 |
| 6 | 0 | 1.804633  | -0.332320 | -1.157787 |
| 6 | 0 | 2.293050  | -1.700587 | -1.119634 |
| 6 | 0 | 0.401645  | -0.102498 | -1.089841 |
| 6 | 0 | -0.802927 | 0.098690  | -1.025326 |
| 1 | 0 | 1.545380  | -2.481714 | -1.023585 |
| 1 | 0 | -1.974925 | 2.451828  | -0.980866 |

**Sum-A1-Sum**

|   |   |           |           |           |
|---|---|-----------|-----------|-----------|
| 6 | 0 | -7.501751 | 1.813686  | 1.506856  |
| 6 | 0 | -5.164870 | -3.259116 | 0.192567  |
| 6 | 0 | -2.380471 | 1.592922  | -1.064627 |
| 1 | 0 | -7.332283 | 1.994122  | 2.574255  |
| 1 | 0 | -8.455973 | 2.293072  | 1.246723  |
| 1 | 0 | -4.722766 | -3.673113 | 1.105439  |
| 1 | 0 | -5.504819 | -4.108894 | -0.415760 |
| 1 | 0 | -1.614960 | 1.732193  | -0.292655 |
| 1 | 0 | -1.977733 | 2.018644  | -1.994379 |
| 6 | 0 | -6.671679 | 0.112331  | 0.057849  |
| 6 | 0 | -6.106088 | -1.115067 | -0.260258 |
| 6 | 0 | -4.735560 | 1.275138  | -0.881634 |
| 6 | 0 | -5.974396 | 1.327157  | -0.258214 |
| 6 | 0 | -4.150469 | 0.004261  | -1.210768 |
| 6 | 0 | -4.826383 | -1.168853 | -0.905219 |
| 6 | 0 | -7.502576 | 0.287274  | 1.175602  |
| 6 | 0 | -6.325961 | -2.265576 | 0.514554  |
| 6 | 0 | -3.741558 | 2.240258  | -0.656431 |
| 6 | 0 | -6.319263 | 2.350478  | 0.638812  |
| 6 | 0 | -2.753999 | 0.089133  | -1.220922 |
| 6 | 0 | -4.149303 | -2.356490 | -0.578247 |
| 6 | 0 | -7.844840 | -0.875154 | 1.883378  |
| 6 | 0 | -7.259209 | -2.144698 | 1.554930  |
| 6 | 0 | -4.112739 | 3.342898  | 0.128162  |
| 6 | 0 | -5.394694 | 3.397520  | 0.772273  |
| 6 | 0 | -2.040048 | -1.120409 | -1.033655 |
| 6 | 0 | -2.759232 | -2.341003 | -0.709413 |
| 1 | 0 | -8.462152 | -0.822724 | 2.775966  |
| 1 | 0 | -3.394591 | 4.121074  | 0.371473  |
| 1 | 0 | -5.574006 | 4.214254  | 1.466061  |
| 1 | 0 | -7.466510 | -2.980298 | 2.217688  |
| 1 | 0 | 3.481368  | 4.143448  | 0.039001  |
| 6 | 0 | 4.184956  | 3.334055  | -0.135196 |
| 6 | 0 | 3.799011  | 2.183842  | -0.840310 |
| 6 | 0 | 5.459868  | 3.409855  | 0.520859  |
| 6 | 0 | 2.429394  | 1.536696  | -1.219116 |
| 6 | 0 | 4.774166  | 1.183949  | -0.978850 |
| 6 | 0 | 6.362741  | 2.336435  | 0.478946  |
| 1 | 0 | 5.648416  | 4.272453  | 1.154012  |
| 1 | 0 | 1.657697  | 1.748777  | -0.470286 |
| 1 | 0 | 2.047299  | 1.900742  | -2.183166 |
| 6 | 0 | 2.771912  | 0.017833  | -1.259271 |
| 6 | 0 | 4.165809  | -0.095127 | -1.221885 |
| 6 | 0 | 6.006038  | 1.256423  | -0.343997 |
| 6 | 0 | 7.521797  | 1.840715  | 1.401340  |
| 6 | 0 | 2.717954  | -2.368675 | -0.574427 |
| 6 | 0 | 4.812230  | -1.256284 | -0.821681 |
| 6 | 0 | 6.672181  | 0.054167  | 0.071281  |
| 1 | 0 | 7.342914  | 2.103999  | 2.449787  |
| 1 | 0 | 8.489812  | 2.278585  | 1.120033  |
| 6 | 0 | 7.492397  | 0.294149  | 1.184616  |

|   |   |           |           |           |
|---|---|-----------|-----------|-----------|
| 6 | 0 | 2.029645  | -1.160532 | -0.997731 |
| 6 | 0 | 6.084098  | -1.181378 | -0.163591 |
| 6 | 0 | 4.105302  | -2.402575 | -0.419268 |
| 6 | 0 | 7.799670  | -0.819360 | 1.981400  |
| 6 | 0 | 6.268438  | -2.275577 | 0.697152  |
| 6 | 0 | 5.090411  | -3.266176 | 0.431785  |
| 6 | 0 | 7.190521  | -2.097188 | 1.739302  |
| 1 | 0 | 8.406596  | -0.713820 | 2.876407  |
| 1 | 0 | 4.626846  | -3.601904 | 1.366004  |
| 1 | 0 | 5.420146  | -4.165764 | -0.106552 |
| 1 | 0 | 7.370961  | -2.885282 | 2.465029  |
| 1 | 0 | 2.092863  | -3.199540 | -0.262421 |
| 1 | 0 | -2.156341 | -3.205552 | -0.449567 |
| 6 | 0 | 0.606090  | -1.150366 | -1.003943 |
| 6 | 0 | -0.616669 | -1.138983 | -1.015191 |

**Cor-A2-Cor**

|   |   |           |           |           |
|---|---|-----------|-----------|-----------|
| 6 | 0 | 7.547524  | 0.782011  | -0.142853 |
| 6 | 0 | 7.440875  | -0.612007 | -0.394238 |
| 6 | 0 | 6.113367  | -0.880104 | -0.816839 |
| 6 | 0 | 5.397050  | 0.346819  | -0.827591 |
| 6 | 0 | 6.284931  | 1.374902  | -0.410938 |
| 6 | 0 | 8.461318  | 1.320628  | 0.751850  |
| 6 | 0 | 8.240262  | -1.557929 | 0.233114  |
| 6 | 0 | 5.497381  | -2.111943 | -0.641774 |
| 6 | 0 | 4.024715  | 0.430983  | -0.668602 |
| 6 | 0 | 5.855161  | 2.546177  | 0.196897  |
| 6 | 0 | 9.440054  | 0.370929  | 1.250338  |
| 6 | 0 | 9.334550  | -0.997857 | 1.004068  |
| 6 | 0 | 7.690872  | -2.902546 | 0.228520  |
| 6 | 0 | 6.387943  | -3.167287 | -0.188067 |
| 6 | 0 | 3.329469  | -0.862585 | -0.708377 |
| 6 | 0 | 4.056569  | -2.073769 | -0.691114 |
| 6 | 0 | 3.544356  | 1.726192  | -0.231236 |
| 6 | 0 | 4.416389  | 2.733755  | 0.180150  |
| 6 | 0 | 6.879059  | 3.230618  | 0.965960  |
| 6 | 0 | 8.117656  | 2.647764  | 1.230217  |
| 1 | 0 | 10.231418 | 0.718851  | 1.908812  |
| 1 | 0 | 10.047134 | -1.666379 | 1.479804  |
| 1 | 0 | 8.277731  | -3.718442 | 0.641921  |
| 1 | 0 | 6.005178  | -4.178954 | -0.085611 |
| 1 | 0 | 2.475187  | 1.887985  | -0.136718 |
| 1 | 0 | 3.993562  | 3.650710  | 0.581747  |
| 1 | 0 | 6.648071  | 4.187717  | 1.425977  |
| 1 | 0 | 8.807027  | 3.171806  | 1.886805  |
| 6 | 0 | -9.398140 | 0.582471  | 1.242740  |
| 6 | 0 | -9.231742 | -0.785611 | 1.456705  |
| 6 | 0 | -8.492153 | 1.346265  | 0.404065  |
| 6 | 0 | -8.143514 | -1.531596 | 0.852700  |
| 6 | 0 | -7.588751 | 0.573688  | -0.311615 |
| 6 | 0 | -8.199467 | 2.768054  | 0.395423  |
| 6 | 0 | -7.420601 | -0.819829 | -0.094836 |
| 6 | 0 | -7.526404 | -2.782574 | 1.259381  |
| 6 | 0 | -6.370768 | 1.088019  | -0.830074 |
| 6 | 0 | -7.004632 | 3.273229  | -0.114814 |
| 1 | 0 | -8.888155 | 3.455574  | 0.877644  |
| 6 | 0 | -6.099804 | -1.166402 | -0.479565 |
| 6 | 0 | -6.230129 | -3.125458 | 0.880217  |
| 1 | 0 | -8.053056 | -3.435686 | 1.950027  |
| 6 | 0 | -5.448511 | 0.012185  | -0.932791 |
| 6 | 0 | -5.978431 | 2.409102  | -0.668676 |

|   |   |            |           |           |
|---|---|------------|-----------|-----------|
| 1 | 0 | -6.805974  | 4.336246  | -0.012222 |
| 6 | 0 | -5.414444  | -2.248884 | 0.056099  |
| 1 | 0 | -5.791886  | -4.032922 | 1.287601  |
| 6 | 0 | -4.077324  | 0.193110  | -0.885064 |
| 6 | 0 | -4.553397  | 2.631604  | -0.825734 |
| 6 | 0 | -3.980851  | -2.178177 | -0.081877 |
| 6 | 0 | -3.647694  | 1.576407  | -0.927685 |
| 6 | 0 | -3.318315  | -1.015299 | -0.535014 |
| 1 | 0 | -4.163215  | 3.644499  | -0.775255 |
| 1 | 0 | -3.364493  | -3.007826 | 0.251586  |
| 1 | 0 | -2.585562  | 1.798434  | -0.952519 |
| 1 | 0 | -9.888068  | -1.282176 | 2.166226  |
| 1 | 0 | 3.489289   | -2.997381 | -0.627901 |
| 6 | 0 | 0.683791   | -0.915827 | -0.630958 |
| 6 | 0 | 1.910508   | -0.900336 | -0.669526 |
| 6 | 0 | -1.898857  | -0.987607 | -0.562038 |
| 6 | 0 | -0.672542  | -0.946805 | -0.593466 |
| 1 | 0 | -10.178161 | 1.101088  | 1.793582  |

**Sum-A2-Cor**

|   |   |            |           |           |
|---|---|------------|-----------|-----------|
| 6 | 0 | -6.839379  | -1.202790 | -0.488840 |
| 6 | 0 | -7.969703  | -0.401977 | -0.177309 |
| 6 | 0 | -7.589351  | 0.962853  | -0.294973 |
| 6 | 0 | -6.229429  | 1.008435  | -0.700019 |
| 6 | 0 | -5.757814  | -0.337731 | -0.800605 |
| 6 | 0 | -6.667769  | -2.488943 | 0.006312  |
| 6 | 0 | -9.001108  | -0.834592 | 0.643406  |
| 6 | 0 | -8.212236  | 1.980477  | 0.418727  |
| 6 | 0 | -5.393896  | 2.089217  | -0.374994 |
| 6 | 0 | -4.437292  | -0.713365 | -0.618080 |
| 6 | 0 | -7.831039  | -3.028675 | 0.686573  |
| 6 | 0 | -8.940782  | -2.242511 | 0.989823  |
| 6 | 0 | -9.794835  | 0.235701  | 1.219060  |
| 6 | 0 | -9.418094  | 1.574034  | 1.113482  |
| 6 | 0 | -7.417876  | 3.184797  | 0.570650  |
| 6 | 0 | -6.076354  | 3.232637  | 0.205309  |
| 6 | 0 | -4.229791  | -2.107052 | -0.299757 |
| 6 | 0 | -5.296696  | -2.956879 | -0.003513 |
| 1 | 0 | -7.805852  | -4.052080 | 1.050642  |
| 1 | 0 | -9.741643  | -2.680492 | 1.579136  |
| 1 | 0 | -10.660099 | -0.012046 | 1.827770  |
| 1 | 0 | -10.001644 | 2.320442  | 1.645117  |
| 1 | 0 | -7.850545  | 4.047783  | 1.068974  |
| 1 | 0 | -5.499951  | 4.125700  | 0.424316  |
| 1 | 0 | -3.215907  | -2.481934 | -0.202056 |
| 1 | 0 | -5.076344  | -3.971296 | 0.317135  |
| 1 | 0 | 9.565375   | -1.734908 | 2.524667  |
| 6 | 0 | 8.917482   | -1.598724 | 1.663317  |
| 6 | 0 | 8.069045   | -2.694356 | 1.290213  |
| 6 | 0 | 8.795294   | -0.345060 | 1.046120  |
| 6 | 0 | 7.096343   | -2.550864 | 0.290227  |
| 1 | 0 | 8.119238   | -3.597605 | 1.891631  |
| 6 | 0 | 9.122401   | 1.120261  | 1.473651  |
| 6 | 0 | 7.904494   | -0.266185 | -0.036340 |
| 6 | 0 | 5.749608   | -3.267158 | -0.019862 |
| 6 | 0 | 7.092173   | -1.331199 | -0.407512 |
| 6 | 0 | 8.042186   | 1.946575  | 0.707888  |
| 1 | 0 | 10.143654  | 1.413443  | 1.192616  |
| 1 | 0 | 9.037029   | 1.252164  | 2.557959  |
| 6 | 0 | 7.459883   | 1.084151  | -0.234840 |
| 6 | 0 | 4.914605   | -2.142237 | -0.709982 |

|   |   |           |           |           |
|---|---|-----------|-----------|-----------|
| 1 | 0 | 5.872101  | -4.134031 | -0.683190 |
| 1 | 0 | 5.256424  | -3.622151 | 0.891245  |
| 6 | 0 | 5.811529  | -1.075580 | -1.003508 |
| 6 | 0 | 7.357746  | 3.144305  | 0.962459  |
| 6 | 0 | 6.212121  | 1.328943  | -0.791057 |
| 6 | 0 | 5.368577  | 0.231331  | -1.181761 |
| 6 | 0 | 6.066612  | 3.396632  | 0.389161  |
| 1 | 0 | 7.729020  | 3.853017  | 1.697422  |
| 6 | 0 | 5.447390  | 2.454526  | -0.445937 |
| 6 | 0 | 4.019008  | 0.603426  | -1.110340 |
| 1 | 0 | 5.532116  | 4.281750  | 0.722270  |
| 6 | 0 | 3.967308  | 2.132728  | -0.819097 |
| 1 | 0 | 3.619027  | 2.703709  | -1.690871 |
| 1 | 0 | 3.279766  | 2.357235  | 0.004032  |
| 6 | 0 | -3.498015 | 0.439430  | -0.563502 |
| 6 | 0 | -4.024704 | 1.709054  | -0.386626 |
| 6 | 0 | 3.076425  | -0.463961 | -0.998913 |
| 6 | 0 | 3.600680  | -1.778082 | -0.842824 |
| 6 | 0 | 1.671402  | -0.266766 | -0.921084 |
| 6 | 0 | 0.457659  | -0.101542 | -0.840005 |
| 6 | 0 | -0.882007 | 0.079197  | -0.748152 |
| 6 | 0 | -2.095427 | 0.246068  | -0.660081 |

**Sum-A2-Sum**

|   |   |           |           |           |
|---|---|-----------|-----------|-----------|
| 6 | 0 | -8.852826 | 1.981241  | 1.160430  |
| 6 | 0 | -6.255127 | -3.134775 | 1.043792  |
| 6 | 0 | -3.819912 | 1.381256  | -1.521339 |
| 1 | 0 | -8.656628 | 2.433664  | 2.138846  |
| 1 | 0 | -9.843830 | 2.329884  | 0.837393  |
| 1 | 0 | -5.757499 | -3.283992 | 2.008269  |
| 1 | 0 | -6.563910 | -4.125788 | 0.683033  |
| 1 | 0 | -3.038178 | 1.751409  | -0.848625 |
| 1 | 0 | -3.475864 | 1.575867  | -2.546697 |
| 6 | 0 | -7.969727 | 0.013597  | 0.144147  |
| 6 | 0 | -7.340716 | -1.224032 | 0.116541  |
| 6 | 0 | -6.143322 | 0.999087  | -1.150137 |
| 6 | 0 | -7.360949 | 1.143360  | -0.500097 |
| 6 | 0 | -5.492150 | -0.281836 | -1.177216 |
| 6 | 0 | -6.082493 | -1.372754 | -0.554343 |
| 6 | 0 | -8.770375 | 0.422746  | 1.222035  |
| 6 | 0 | -7.462257 | -2.151394 | 1.164490  |
| 6 | 0 | -5.203945 | 2.039448  | -1.223350 |
| 6 | 0 | -7.737599 | 2.341072  | 0.127872  |
| 6 | 0 | -4.105173 | -0.130005 | -1.276168 |
| 6 | 0 | -5.323689 | -2.405179 | 0.023835  |
| 6 | 0 | -9.014311 | -0.538606 | 2.214643  |
| 6 | 0 | -8.363893 | -1.818627 | 2.186224  |
| 6 | 0 | -5.616095 | 3.284233  | -0.723547 |
| 6 | 0 | -6.875901 | 3.433868  | -0.051335 |
| 6 | 0 | -3.313347 | -1.217954 | -0.830079 |
| 6 | 0 | -3.943289 | -2.354555 | -0.177309 |
| 1 | 0 | -9.601538 | -0.293516 | 3.095325  |
| 1 | 0 | -4.939958 | 4.134611  | -0.718951 |
| 1 | 0 | -7.081477 | 4.389249  | 0.423484  |
| 1 | 0 | -8.496315 | -2.468584 | 3.046674  |
| 1 | 0 | 4.611331  | 4.071981  | 1.038152  |
| 6 | 0 | 5.338312  | 3.355177  | 0.666580  |
| 6 | 0 | 4.966005  | 2.363547  | -0.253908 |
| 6 | 0 | 6.639420  | 3.353816  | 1.273521  |
| 6 | 0 | 3.607258  | 1.743149  | -0.708699 |
| 6 | 0 | 5.973859  | 1.466886  | -0.641720 |

|   |   |           |           |           |   |   |            |           |           |
|---|---|-----------|-----------|-----------|---|---|------------|-----------|-----------|
| 6 | 0 | 7.582828  | 2.361399  | 0.966796  | 6 | 0 | -10.698192 | 0.614403  | 1.247102  |
| 1 | 0 | 6.822801  | 4.069962  | 2.069757  | 6 | 0 | -10.561260 | -0.768189 | 1.367369  |
| 1 | 0 | 2.863504  | 1.752885  | 0.095864  | 6 | 0 | -9.760954  | 1.417484  | 0.482743  |
| 1 | 0 | 3.164655  | 2.282328  | -1.557835 | 6 | 0 | -9.473312  | -1.490446 | 0.734904  |
| 6 | 0 | 4.010632  | 0.286686  | -1.085607 | 6 | 0 | -8.857204  | 0.679567  | -0.268211 |
| 6 | 0 | 5.407833  | 0.238914  | -1.128565 | 6 | 0 | -9.442254  | 2.830367  | 0.580965  |
| 6 | 0 | 7.231123  | 1.464788  | -0.054468 | 6 | 0 | -8.718296  | -0.728476 | -0.146081 |
| 6 | 0 | 8.805465  | 1.740869  | 1.714632  | 6 | 0 | -8.887215  | -2.777598 | 1.065566  |
| 6 | 0 | 4.089928  | -2.193266 | -0.924288 | 6 | 0 | -7.619933  | 1.205338  | -0.726045 |
| 6 | 0 | 6.119862  | -0.946784 | -1.010152 | 6 | 0 | -8.228667  | 3.347034  | 0.129853  |
| 6 | 0 | 7.966514  | 0.237376  | 0.065702  | 1 | 0 | -10.127869 | 3.495793  | 1.098428  |
| 1 | 0 | 8.666649  | 1.763729  | 2.801260  | 6 | 0 | -7.395819  | -1.072278 | -0.527377 |
| 1 | 0 | 9.739193  | 2.278651  | 1.497850  | 6 | 0 | -7.589571  | -3.117558 | 0.689344  |
| 6 | 0 | 8.831500  | 0.276823  | 1.170346  | 1 | 0 | -9.439713  | -3.466727 | 1.698315  |
| 6 | 0 | 3.333156  | -0.958177 | -1.052408 | 6 | 0 | -6.714995  | 0.121799  | -0.885957 |
| 6 | 0 | 7.419496  | -0.948728 | -0.404875 | 6 | 0 | -7.207188  | 2.503934  | -0.464960 |
| 6 | 0 | 5.483070  | -2.187567 | -0.835100 | 1 | 0 | -8.012756  | 4.396240  | 0.311785  |
| 6 | 0 | 9.226011  | -0.963618 | 1.695251  | 6 | 0 | -6.741548  | -2.202253 | -0.055862 |
| 6 | 0 | 7.693297  | -2.190417 | 0.192137  | 1 | 0 | -7.176388  | -4.058794 | 1.040780  |
| 6 | 0 | 6.545500  | -3.160926 | -0.231748 | 6 | 0 | -5.342048  | 0.272895  | -0.801542 |
| 6 | 0 | 8.659674  | -2.190720 | 1.209038  | 6 | 0 | -5.775368  | 2.709366  | -0.580552 |
| 1 | 0 | 9.872663  | -1.019775 | 2.566520  | 6 | 0 | -5.304715  | -2.150136 | -0.162819 |
| 1 | 0 | 6.145123  | -3.712158 | 0.626207  | 6 | 0 | -4.886520  | 1.646710  | -0.739867 |
| 1 | 0 | 6.883945  | -3.906179 | -0.965048 | 6 | 0 | -4.612718  | -0.971928 | -0.523383 |
| 1 | 0 | 8.910400  | -3.105032 | 1.739852  | 1 | 0 | -5.368046  | 3.708321  | -0.451973 |
| 1 | 0 | 3.515472  | -3.102066 | -0.775205 | 1 | 0 | -4.709838  | -3.012555 | 0.121805  |
| 1 | 0 | -3.279133 | -3.095110 | 0.256995  | 1 | 0 | -3.820327  | 1.849792  | -0.730104 |
| 6 | 0 | -0.668261 | -1.109060 | -0.917305 | 1 | 0 | -11.241645 | -1.300541 | 2.026318  |
| 6 | 0 | -1.893982 | -1.161103 | -0.879407 | 1 | 0 | 4.768532   | -3.010073 | -0.373009 |
| 6 | 0 | 1.913868  | -1.017975 | -1.002883 | 6 | 0 | 1.970554   | -0.915192 | -0.588569 |
| 6 | 0 | 0.687826  | -1.058284 | -0.960811 | 6 | 0 | 3.199938   | -0.917698 | -0.606513 |

**Cor-A3-Cor**

|   |   |           |           |           |
|---|---|-----------|-----------|-----------|
| 6 | 0 | 8.836747  | 0.783805  | -0.172100 |
| 6 | 0 | 8.726869  | -0.625755 | -0.305909 |
| 6 | 0 | 7.401828  | -0.924391 | -0.715105 |
| 6 | 0 | 6.690627  | 0.299399  | -0.835851 |
| 6 | 0 | 7.579295  | 1.356011  | -0.500570 |
| 6 | 0 | 9.745571  | 1.393351  | 0.680868  |
| 6 | 0 | 9.517819  | -1.518079 | 0.404618  |
| 6 | 0 | 6.780196  | -2.135524 | -0.443360 |
| 6 | 0 | 5.317703  | 0.401735  | -0.696461 |
| 6 | 0 | 7.149426  | 2.576238  | 0.000677  |
| 6 | 0 | 10.716384 | 0.485945  | 1.265451  |
| 6 | 0 | 10.608095 | -0.898236 | 1.134326  |
| 6 | 0 | 8.963675  | -2.856713 | 0.507722  |
| 6 | 0 | 7.663232  | -3.151772 | 0.104174  |
| 6 | 0 | 4.618277  | -0.888916 | -0.633817 |
| 6 | 0 | 5.340277  | -2.097160 | -0.508479 |
| 6 | 0 | 4.838825  | 1.730880  | -0.376184 |
| 6 | 0 | 5.711699  | 2.766758  | -0.045160 |
| 6 | 0 | 8.169874  | 3.320181  | 0.717108  |
| 6 | 0 | 9.403541  | 2.757560  | 1.040987  |
| 1 | 0 | 11.504005 | 0.885353  | 1.898534  |
| 1 | 0 | 11.314798 | -1.525862 | 1.670239  |
| 1 | 0 | 9.544538  | -3.636769 | 0.992143  |
| 1 | 0 | 7.276206  | -4.150130 | 0.287461  |
| 1 | 0 | 3.769702  | 1.904819  | -0.306651 |
| 1 | 0 | 5.289343  | 3.716236  | 0.271841  |
| 1 | 0 | 7.939550  | 4.313837  | 1.091404  |
| 1 | 0 | 10.089655 | 3.333421  | 1.656035  |

**Sum-A3-Cor**

|   |   |            |           |           |
|---|---|------------|-----------|-----------|
| 6 | 0 | -8.127817  | -1.225252 | -0.449744 |
| 6 | 0 | -9.279519  | -0.446977 | -0.160162 |
| 6 | 0 | -8.925286  | 0.925048  | -0.275659 |
| 6 | 0 | -7.559830  | 0.997443  | -0.657517 |
| 6 | 0 | -7.059034  | -0.339018 | -0.745716 |
| 6 | 0 | -7.938383  | -2.506191 | 0.052378  |
| 6 | 0 | -10.315773 | -0.898383 | 0.644160  |
| 6 | 0 | -9.581086  | 1.931668  | 0.424023  |
| 6 | 0 | -6.752354  | 2.096103  | -0.321695 |
| 6 | 0 | -5.734412  | -0.686888 | -0.539421 |
| 6 | 0 | -9.101845  | -3.067802 | 0.714352  |
| 6 | 0 | -10.232531 | -2.303773 | 0.996054  |
| 6 | 0 | -11.141064 | 0.156988  | 1.202724  |
| 6 | 0 | -10.790106 | 1.502482  | 1.099334  |
| 6 | 0 | -8.814331  | 3.152500  | 0.585670  |
| 6 | 0 | -7.467996  | 3.226887  | 0.243189  |
| 6 | 0 | -5.503857  | -2.075101 | -0.213143 |
| 6 | 0 | -6.558030  | -2.945849 | 0.067513  |
| 1 | 0 | -9.061921  | -4.089433 | 1.082067  |
| 1 | 0 | -11.034239 | -2.756459 | 1.572972  |
| 1 | 0 | -12.011389 | -0.106774 | 1.797326  |
| 1 | 0 | -11.397892 | 2.238236  | 1.618518  |
| 1 | 0 | -9.273111  | 4.007816  | 1.073757  |

|   |   |           |           |           |   |   |            |           |           |
|---|---|-----------|-----------|-----------|---|---|------------|-----------|-----------|
| 1 | 0 | -6.913885 | 4.132236  | 0.469174  | 6 | 0 | -10.054469 | 0.489611  | 1.248996  |
| 1 | 0 | -4.484321 | -2.428769 | -0.096908 | 6 | 0 | -8.834953  | -2.115677 | 0.992794  |
| 1 | 0 | -6.322450 | -3.954604 | 0.395124  | 6 | 0 | -6.382913  | 2.180233  | -0.980976 |
| 1 | 0 | 10.827539 | -1.649236 | 2.626940  | 6 | 0 | -8.932783  | 2.456206  | 0.344522  |
| 6 | 0 | 10.191877 | -1.528856 | 1.754198  | 6 | 0 | -5.359057  | -0.014734 | -1.201665 |
| 6 | 0 | 9.372633  | -2.642766 | 1.370130  | 6 | 0 | -6.682699  | -2.348031 | -0.125406 |
| 6 | 0 | 10.054610 | -0.279731 | 1.130999  | 6 | 0 | -10.353461 | -0.544463 | 2.149268  |
| 6 | 0 | 8.414510  | -2.522155 | 0.353192  | 6 | 0 | -9.746940  | -1.839973 | 2.022285  |
| 1 | 0 | 9.431012  | -3.543078 | 1.975202  | 6 | 0 | -6.762112  | 3.391451  | -0.382308 |
| 6 | 0 | 10.344190 | 1.193219  | 1.559382  | 6 | 0 | -8.030076  | 3.528380  | 0.276904  |
| 6 | 0 | 9.181102  | -0.222273 | 0.033206  | 6 | 0 | -4.615377  | -1.165757 | -0.836447 |
| 6 | 0 | 7.088281  | -3.266879 | 0.022391  | 6 | 0 | -5.297690  | -2.330918 | -0.295611 |
| 6 | 0 | 8.397300  | -1.304822 | -0.348409 | 1 | 0 | -10.951448 | -0.355091 | 3.036401  |
| 6 | 0 | 9.260559  | 1.994958  | 0.772609  | 1 | 0 | -6.056801  | 4.212700  | -0.291093 |
| 1 | 0 | 11.363889 | 1.506546  | 1.294930  | 1 | 0 | -8.212483  | 4.446044  | 0.829201  |
| 1 | 0 | 10.237519 | 1.326419  | 2.641644  | 1 | 0 | -9.920594  | -2.556597 | 2.820140  |
| 6 | 0 | 8.712353  | 1.118061  | -0.177185 | 1 | 0 | 5.928328   | 4.195883  | 0.561511  |
| 6 | 0 | 6.242348  | -2.161338 | -0.685507 | 6 | 0 | 6.652094   | 3.431707  | 0.292376  |
| 1 | 0 | 7.239909  | -4.132931 | -0.635971 | 6 | 0 | 6.284120   | 2.343810  | -0.514069 |
| 1 | 0 | 6.586908  | -3.629351 | 0.926054  | 6 | 0 | 7.940313   | 3.485246  | 0.923905  |
| 6 | 0 | 7.122106  | -1.077296 | -0.967047 | 6 | 0 | 4.925680   | 1.691628  | -0.922443 |
| 6 | 0 | 8.547416  | 3.179073  | 1.011603  | 6 | 0 | 7.286045   | 1.395574  | -0.772016 |
| 6 | 0 | 7.469568  | 1.335553  | -0.755453 | 6 | 0 | 8.874941   | 2.452011  | 0.756310  |
| 6 | 0 | 6.655557  | 0.219715  | -1.157028 | 1 | 0 | 8.118020   | 4.287615  | 1.634592  |
| 6 | 0 | 7.261414  | 3.403158  | 0.415490  | 1 | 0 | 4.166939   | 1.804231  | -0.140006 |
| 1 | 0 | 8.891392  | 3.897359  | 1.750544  | 1 | 0 | 4.507242   | 2.133332  | -1.837478 |
| 6 | 0 | 6.676088  | 2.446143  | -0.427068 | 6 | 0 | 5.314839   | 0.196619  | -1.118766 |
| 6 | 0 | 5.297610  | 0.564172  | -1.109902 | 6 | 0 | 6.711411   | 0.126185  | -1.124233 |
| 1 | 0 | 6.703227  | 4.278036  | 0.736574  | 6 | 0 | 8.530862   | 1.446309  | -0.160727 |
| 6 | 0 | 5.209547  | 2.092909  | -0.824473 | 6 | 0 | 10.072145  | 1.907595  | 1.598852  |
| 1 | 0 | 4.864648  | 2.654124  | -1.703899 | 6 | 0 | 5.352548   | -2.250345 | -0.670396 |
| 1 | 0 | 4.503508  | 2.305564  | -0.013952 | 6 | 0 | 7.401953   | -1.046787 | -0.851867 |
| 6 | 0 | -4.820063 | 0.485135  | -0.472459 | 6 | 0 | 9.243758   | 0.231878  | 0.119180  |
| 6 | 0 | -5.375653 | 1.744154  | -0.308679 | 1 | 0 | 9.911729   | 2.060251  | 2.671917  |
| 6 | 0 | 4.375352  | -0.522057 | -1.011213 | 1 | 0 | 11.018477  | 2.403278  | 1.340733  |
| 6 | 0 | 4.923703  | -1.824667 | -0.841978 | 6 | 0 | 10.085547  | 0.389560  | 1.231051  |
| 6 | 0 | 2.965450  | -0.353586 | -0.958069 | 6 | 0 | 4.618092   | -1.028374 | -0.958688 |
| 6 | 0 | 1.747358  | -0.213134 | -0.898302 | 6 | 0 | 8.688465   | -0.994332 | -0.221721 |
| 6 | 0 | 0.402886  | -0.059730 | -0.829966 | 6 | 0 | 6.742938   | -2.251017 | -0.548864 |
| 6 | 0 | -0.815037 | 0.082394  | -0.763207 | 6 | 0 | 10.448404  | -0.785623 | 1.906943  |
| 6 | 0 | -2.224779 | 0.246903  | -0.685934 | 6 | 0 | 8.929731   | -2.160597 | 0.522841  |
| 6 | 0 | -3.409969 | 0.385207  | -0.620969 | 6 | 0 | 7.776994   | -3.159853 | 0.189087  |
| 1 | 0 | 4.224857  | -2.634903 | -0.836321 | 6 | 0 | 9.873532   | -2.053778 | 1.555139  |
| 1 | 0 | -4.685571 | 2.547114  | -0.153946 | 1 | 0 | 11.075377  | -0.747353 | 2.793441  |

**Sum-A3-Sum**

|   |   |            |           |           |
|---|---|------------|-----------|-----------|
| 6 | 0 | -10.081723 | 2.049530  | 1.321247  |
| 6 | 0 | -7.660478  | -3.128319 | 0.809870  |
| 6 | 0 | -5.016127  | 1.500385  | -1.308128 |
| 1 | 0 | -9.891177  | 2.408683  | 2.338724  |
| 1 | 0 | -11.052755 | 2.460513  | 1.011231  |
| 1 | 0 | -7.188932  | -3.378022 | 1.766590  |
| 1 | 0 | -7.995427  | -4.072630 | 0.358569  |
| 1 | 0 | -4.237828  | 1.782065  | -0.590182 |
| 1 | 0 | -4.641967  | 1.770296  | -2.305439 |
| 6 | 0 | -9.245047  | 0.146099  | 0.154982  |
| 6 | 0 | -8.658968  | -1.106696 | 0.031628  |
| 6 | 0 | -7.359109  | 1.172451  | -1.016241 |
| 6 | 0 | -8.584457  | 1.304177  | -0.378164 |
| 6 | 0 | -6.752076  | -0.124356 | -1.142518 |
| 6 | 0 | -7.392600  | -1.242555 | -0.626137 |

|   |   |            |           |           |
|---|---|------------|-----------|-----------|
| 6 | 0 | -10.054469 | 0.489611  | 1.248996  |
| 6 | 0 | -8.834953  | -2.115677 | 0.992794  |
| 6 | 0 | -6.382913  | 2.180233  | -0.980976 |
| 6 | 0 | -8.932783  | 2.456206  | 0.344522  |
| 6 | 0 | -5.359057  | -0.014734 | -1.201665 |
| 6 | 0 | -6.682699  | -2.348031 | -0.125406 |
| 6 | 0 | -10.353461 | -0.544463 | 2.149268  |
| 6 | 0 | -9.746940  | -1.839973 | 2.022285  |
| 6 | 0 | -6.762112  | 3.391451  | -0.382308 |
| 6 | 0 | -8.030076  | 3.528380  | 0.276904  |
| 6 | 0 | -4.615377  | -1.165757 | -0.836447 |
| 6 | 0 | -5.297690  | -2.330918 | -0.295611 |
| 1 | 0 | -10.951448 | -0.355091 | 3.036401  |
| 1 | 0 | -6.056801  | 4.212700  | -0.291093 |
| 1 | 0 | -8.212483  | 4.446044  | 0.829201  |
| 1 | 0 | -9.920594  | -2.556597 | 2.820140  |
| 1 | 0 | 5.928328   | 4.195883  | 0.561511  |
| 6 | 0 | 6.652094   | 3.431707  | 0.292376  |
| 6 | 0 | 6.284120   | 2.343810  | -0.514069 |
| 6 | 0 | 7.940313   | 3.485246  | 0.923905  |
| 6 | 0 | 4.925680   | 1.691628  | -0.922443 |
| 6 | 0 | 7.286045   | 1.395574  | -0.772016 |
| 6 | 0 | 8.874941   | 2.452011  | 0.756310  |
| 1 | 0 | 8.118020   | 4.287615  | 1.634592  |
| 1 | 0 | 4.166939   | 1.804231  | -0.140006 |
| 1 | 0 | 4.507242   | 2.133332  | -1.837478 |
| 6 | 0 | 5.314839   | 0.196619  | -1.118766 |
| 6 | 0 | 6.711411   | 0.126185  | -1.124233 |
| 6 | 0 | 8.530862   | 1.446309  | -0.160727 |
| 6 | 0 | 10.072145  | 1.907595  | 1.598852  |
| 6 | 0 | 5.352548   | -2.250345 | -0.670396 |
| 6 | 0 | 7.401953   | -1.046787 | -0.851867 |
| 6 | 0 | 9.243758   | 0.231878  | 0.119180  |
| 1 | 0 | 9.911729   | 2.060251  | 2.671917  |
| 1 | 0 | 11.018477  | 2.403278  | 1.340733  |
| 6 | 0 | 10.085547  | 0.389560  | 1.231051  |
| 6 | 0 | 4.618092   | -1.028374 | -0.958688 |
| 6 | 0 | 8.688465   | -0.994332 | -0.221721 |
| 6 | 0 | 6.742938   | -2.251017 | -0.548864 |
| 6 | 0 | 10.448404  | -0.785623 | 1.906943  |
| 6 | 0 | 8.929731   | -2.160597 | 0.522841  |
| 6 | 0 | 7.776994   | -3.159853 | 0.189087  |
| 6 | 0 | 9.873532   | -2.053778 | 1.555139  |
| 1 | 0 | 11.075377  | -0.747353 | 2.793441  |
| 1 | 0 | 7.349521   | -3.601237 | 1.096010  |
| 1 | 0 | 8.120084   | -3.990370 | -0.443447 |
| 1 | 0 | 10.097953  | -2.902269 | 2.195437  |
| 1 | 0 | 4.761195   | -3.128450 | -0.431008 |
| 1 | 0 | -4.669113  | -3.129836 | 0.084740  |
| 6 | 0 | 0.617976   | -1.097070 | -0.903196 |
| 6 | 0 | -0.614907  | -1.114281 | -0.888844 |
| 6 | 0 | 3.198913   | -1.063036 | -0.936820 |
| 6 | 0 | 1.969581   | -1.078354 | -0.918817 |
| 6 | 0 | -3.195764  | -1.155018 | -0.855356 |
| 6 | 0 | -1.966484  | -1.133875 | -0.871187 |

**Cor-A4-Cor**

|   |   |           |           |           |
|---|---|-----------|-----------|-----------|
| 6 | 0 | 10.128391 | 0.967625  | 0.025311  |
| 6 | 0 | 10.022922 | -0.505824 | -0.538420 |
| 6 | 0 | 8.692933  | -0.697564 | -1.037659 |
| 6 | 0 | 7.974413  | 0.656856  | -0.785646 |
| 6 | 0 | 8.863403  | 1.686703  | -0.128249 |

|   |   |            |           |           |                   |   |            |           |           |
|---|---|------------|-----------|-----------|-------------------|---|------------|-----------|-----------|
| 6 | 0 | 11.046039  | 1.361642  | 1.104728  |                   |   |            |           |           |
| 6 | 0 | 10.827645  | -1.681485 | -0.059701 |                   |   |            |           |           |
| 6 | 0 | 8.080564   | -2.077512 | -1.095394 |                   |   |            |           |           |
| 6 | 0 | 6.602426   | 0.731642  | -0.575230 |                   |   |            |           |           |
| 6 | 0 | 8.434704   | 2.848329  | 0.786145  |                   |   |            |           |           |
| 6 | 0 | 12.029256  | 0.206835  | 1.439453  |                   |   |            |           |           |
| 6 | 0 | 11.925401  | -1.240104 | 0.886045  |                   |   |            |           |           |
| 6 | 0 | 10.280935  | -3.147918 | -0.338142 |                   |   |            |           |           |
| 6 | 0 | 8.975901   | -3.337761 | -0.831234 |                   |   |            |           |           |
| 6 | 0 | 5.907385   | -0.670336 | -0.881028 |                   |   |            |           |           |
| 6 | 0 | 6.639485   | -2.009913 | -1.123186 |                   |   |            |           |           |
| 6 | 0 | 6.121793   | 2.064811  | 0.178782  |                   |   |            |           |           |
| 6 | 0 | 6.994979   | 3.073577  | 0.825940  |                   |   |            |           |           |
| 6 | 0 | 9.461775   | 3.427198  | 1.756640  |                   |   |            |           |           |
| 6 | 0 | 10.702776  | 2.720008  | 1.908670  |                   |   |            |           |           |
| 1 | 0 | 12.823687  | 0.442135  | 2.222199  |                   |   |            |           |           |
| 1 | 0 | 12.642303  | -2.078543 | 1.257977  |                   |   |            |           |           |
| 1 | 0 | 10.872169  | -4.133843 | -0.064429 |                   |   |            |           |           |
| 1 | 0 | 8.595621   | -4.463176 | -0.925510 |                   |   |            |           |           |
| 1 | 0 | 5.052407   | 2.236546  | 0.329641  |                   |   |            |           |           |
| 1 | 0 | 6.572479   | 4.000350  | 1.460680  |                   |   |            |           |           |
| 1 | 0 | 9.231780   | 4.382867  | 2.461951  |                   |   |            |           |           |
| 1 | 0 | 11.394821  | 3.149966  | 2.727234  |                   |   |            |           |           |
| 6 | 0 | -11.920034 | 0.944107  | 1.278036  |                   |   |            |           |           |
| 6 | 0 | -11.699419 | -0.339732 | 1.929176  |                   |   |            |           |           |
| 6 | 0 | -11.090380 | 1.448043  | 0.148026  |                   |   |            |           |           |
| 6 | 0 | -10.626571 | -1.252150 | 1.516828  |                   |   |            |           |           |
| 6 | 0 | -10.210460 | 0.467440  | -0.357610 |                   |   |            |           |           |
| 6 | 0 | -10.839915 | 2.862972  | -0.341250 |                   |   |            |           |           |
| 6 | 0 | -9.986082  | -0.840107 | 0.305344  |                   |   |            |           |           |
| 6 | 0 | -9.945366  | -2.345286 | 2.296831  |                   |   |            |           |           |
| 6 | 0 | -9.041208  | 0.835166  | -1.107348 |                   |   |            |           |           |
| 6 | 0 | -9.693360  | 3.223822  | -1.079009 |                   |   |            |           |           |
| 1 | 0 | -11.517523 | 3.687864  | -0.049204 |                   |   |            |           |           |
| 6 | 0 | -8.678544  | -1.278799 | -0.033254 |                   |   |            |           |           |
| 6 | 0 | -8.662571  | -2.780074 | 1.963369  |                   |   |            |           |           |
| 1 | 0 | -10.408338 | -2.778550 | 3.223569  |                   |   |            |           |           |
| 6 | 0 | -8.092285  | -0.243842 | -0.905972 |                   |   |            |           |           |
| 6 | 0 | -8.677316  | 2.207387  | -1.402253 |                   |   |            |           |           |
| 1 | 0 | -9.518948  | 4.316699  | -1.335864 |                   |   |            |           |           |
| 6 | 0 | -7.926491  | -2.161946 | 0.814323  |                   |   |            |           |           |
| 1 | 0 | -8.170489  | -3.535901 | 2.640190  |                   |   |            |           |           |
| 6 | 0 | -6.723279  | -0.016225 | -0.994885 |                   |   |            |           |           |
| 6 | 0 | -7.268814  | 2.408377  | -1.711803 |                   |   |            |           |           |
| 6 | 0 | -6.503638  | -2.103464 | 0.575321  |                   |   |            |           |           |
| 6 | 0 | -6.337076  | 1.348898  | -1.517275 |                   |   |            |           |           |
| 6 | 0 | -5.903281  | -1.081652 | -0.293786 |                   |   |            |           |           |
| 1 | 0 | -6.905669  | 3.438190  | -2.016548 |                   |   |            |           |           |
| 1 | 0 | -5.840902  | -2.804924 | 1.142232  |                   |   |            |           |           |
| 1 | 0 | -5.282890  | 1.585265  | -1.674909 |                   |   |            |           |           |
| 1 | 0 | -12.295889 | -0.615553 | 2.829785  |                   |   |            |           |           |
| 1 | 0 | 6.073879   | -3.028485 | -1.239130 |                   |   |            |           |           |
| 6 | 0 | 3.258185   | -0.698038 | -0.790868 |                   |   |            |           |           |
| 6 | 0 | 4.489625   | -0.702562 | -0.832360 |                   |   |            |           |           |
| 6 | 0 | 0.672369   | -0.764301 | -0.675919 |                   |   |            |           |           |
| 6 | 0 | 1.910088   | -0.725798 | -0.735964 |                   |   |            |           |           |
| 1 | 0 | -12.680651 | 1.621203  | 1.695439  |                   |   |            |           |           |
| 6 | 0 | -1.908566  | -0.894117 | -0.549216 |                   |   |            |           |           |
| 6 | 0 | -0.670607  | -0.816260 | -0.618175 |                   |   |            |           |           |
| 6 | 0 | -3.257385  | -0.963391 | -0.461769 |                   |   |            |           |           |
| 6 | 0 | -4.487054  | -1.018961 | -0.383915 |                   |   |            |           |           |
|   |   |            |           |           | <b>Sum-A4-Cor</b> |   |            |           |           |
| 6 | 0 |            |           |           | 6                 | 0 | -9.288586  | -1.299967 | -0.297712 |
| 6 | 0 |            |           |           | 6                 | 0 | -10.454104 | -0.574743 | 0.066380  |
| 6 | 0 |            |           |           | 6                 | 0 | -10.210862 | 0.802222  | -0.182170 |
| 6 | 0 |            |           |           | 6                 | 0 | -8.895211  | 0.927804  | -0.697691 |
| 6 | 0 |            |           |           | 6                 | 0 | -8.323150  | -0.370584 | -0.769832 |
| 6 | 0 |            |           |           | 6                 | 0 | -8.950300  | -2.520617 | 0.268501  |
| 6 | 0 |            |           |           | 6                 | 0 | -11.355681 | -1.022100 | 1.021518  |
| 6 | 0 |            |           |           | 6                 | 0 | -10.852925 | 1.821392  | 0.507787  |
| 6 | 0 |            |           |           | 6                 | 0 | -8.135457  | 2.081618  | -0.560413 |
| 6 | 0 |            |           |           | 6                 | 0 | -6.961389  | -0.609300 | -0.710369 |
| 6 | 0 |            |           |           | 6                 | 0 | -9.986245  | -3.098716 | 1.105453  |
| 6 | 0 |            |           |           | 6                 | 0 | -11.129406 | -2.386090 | 1.463899  |
| 6 | 0 |            |           |           | 6                 | 0 | -12.183927 | 0.022472  | 1.596295  |
| 6 | 0 |            |           |           | 6                 | 0 | -11.944768 | 1.374522  | 1.352312  |
| 6 | 0 |            |           |           | 6                 | 0 | -10.159311 | 3.097032  | 0.471670  |
| 6 | 0 |            |           |           | 6                 | 0 | -8.868331  | 3.222271  | -0.036749 |
| 6 | 0 |            |           |           | 6                 | 0 | -6.598567  | -1.956365 | -0.319855 |
| 6 | 0 |            |           |           | 6                 | 0 | -7.546586  | -2.867052 | 0.145368  |
| 1 | 0 |            |           |           | 1                 | 0 | -9.831288  | -4.082317 | 1.540277  |
| 1 | 0 |            |           |           | 1                 | 0 | -11.823983 | -2.840200 | 2.165307  |
| 1 | 0 |            |           |           | 1                 | 0 | -12.959926 | -0.245353 | 2.308148  |
| 1 | 0 |            |           |           | 1                 | 0 | -12.542837 | 2.110195  | 1.882991  |
| 1 | 0 |            |           |           | 1                 | 0 | -10.620995 | 3.966630  | 0.931173  |
| 1 | 0 |            |           |           | 1                 | 0 | -8.369144  | 4.183793  | 0.043365  |
| 1 | 0 |            |           |           | 1                 | 0 | -5.550526  | -2.238309 | -0.305398 |
| 1 | 0 |            |           |           | 1                 | 0 | -7.201834  | -3.831657 | 0.507299  |
| 1 | 0 |            |           |           | 1                 | 0 | 11.951144  | -1.634097 | 2.722991  |
| 6 | 0 |            |           |           | 6                 | 0 | 11.348677  | -1.480092 | 1.832096  |
| 6 | 0 |            |           |           | 6                 | 0 | 10.625930  | -2.609026 | 1.316812  |
| 6 | 0 |            |           |           | 6                 | 0 | 11.158172  | -0.193040 | 1.306268  |
| 6 | 0 |            |           |           | 6                 | 0 | 9.704620   | -2.463138 | 0.269175  |
| 1 | 0 |            |           |           | 1                 | 0 | 10.722758  | -3.552274 | 1.846998  |
| 6 | 0 |            |           |           | 6                 | 0 | 11.330453  | 1.256273  | 1.862357  |
| 6 | 0 |            |           |           | 6                 | 0 | 10.333014  | -0.100326 | 0.174716  |
| 6 | 0 |            |           |           | 6                 | 0 | 8.443858   | -3.255091 | -0.201024 |
| 6 | 0 |            |           |           | 6                 | 0 | 9.634568   | -1.191930 | -0.324249 |
| 6 | 0 |            |           |           | 6                 | 0 | 10.235865  | 2.052472  | 1.083187  |
| 1 | 0 |            |           |           | 1                 | 0 | 12.339191  | 1.651727  | 1.678242  |
| 6 | 0 |            |           |           | 1                 | 0 | 11.162779  | 1.294936  | 2.944424  |
| 6 | 0 |            |           |           | 6                 | 0 | 9.789519   | 1.222037  | 0.043226  |
| 6 | 0 |            |           |           | 6                 | 0 | 7.553433   | -2.134451 | -0.826297 |
| 1 | 0 |            |           |           | 1                 | 0 | 8.695213   | -4.035873 | -0.932243 |
| 1 | 0 |            |           |           | 1                 | 0 | 7.940273   | -3.748822 | 0.637184  |
| 6 | 0 |            |           |           | 6                 | 0 | 8.368443   | -0.997255 | -0.967142 |
| 6 | 0 |            |           |           | 6                 | 0 | 9.438239   | 3.170602  | 1.370715  |
| 6 | 0 |            |           |           | 6                 | 0 | 8.564907   | 1.410787  | -0.581548 |
| 6 | 0 |            |           |           | 6                 | 0 | 7.841302   | 0.280580  | -1.096320 |
| 6 | 0 |            |           |           | 6                 | 0 | 8.170606   | 3.364697  | 0.725364  |
| 1 | 0 |            |           |           | 1                 | 0 | 9.699417   | 3.848588  | 2.178451  |
| 6 | 0 |            |           |           | 6                 | 0 | 7.686779   | 2.442334  | -0.215039 |
| 6 | 0 |            |           |           | 6                 | 0 | 6.465504   | 0.531253  | -1.093073 |
| 1 | 0 |            |           |           | 1                 | 0 | 7.544465   | 4.177800  | 1.081672  |
| 6 | 0 |            |           |           | 6                 | 0 | 6.266609   | 2.028489  | -0.714361 |
| 6 | 0 |            |           |           | 1                 | 0 | 5.932350   | 2.629651  | -1.571290 |
| 1 | 0 |            |           |           | 1                 | 0 | 5.508684   | 2.142798  | 0.068553  |
| 6 | 0 |            |           |           | 6                 | 0 | -6.131294  | 0.600557  | -0.790722 |
| 6 | 0 |            |           |           | 6                 | 0 | -6.715607  | 1.885219  | -0.713797 |
| 6 | 0 |            |           |           | 6                 | 0 | 5.614394   | -0.603635 | -1.094389 |
| 6 | 0 |            |           |           | 6                 | 0 | 6.178487   | -1.937926 | -0.958669 |
| 6 | 0 |            |           |           | 6                 | 0 | 4.203192   | -0.457553 | -1.082240 |

|   |   |           |           |           |
|---|---|-----------|-----------|-----------|
| 6 | 0 | 2.980392  | -0.320984 | -1.063779 |
| 6 | 0 | 1.638960  | -0.177407 | -1.040176 |
| 6 | 0 | 0.410243  | -0.050048 | -1.013211 |
| 6 | 0 | -0.926626 | 0.085491  | -0.978755 |
| 6 | 0 | -2.155513 | 0.208212  | -0.942456 |
| 6 | 0 | -3.497046 | 0.345810  | -0.896279 |
| 6 | 0 | -4.719270 | 0.479688  | -0.849045 |
| 1 | 0 | 5.473679  | -2.754430 | -0.838020 |
| 1 | 0 | -6.045451 | 2.738840  | -0.684539 |

**Sum-A4-Sum**

|   |   |            |           |           |
|---|---|------------|-----------|-----------|
| 6 | 0 | -11.374666 | 2.127873  | 1.291604  |
| 6 | 0 | -8.953179  | -3.062499 | 0.928655  |
| 6 | 0 | -6.303137  | 1.506244  | -1.310160 |
| 1 | 0 | -11.186495 | 2.514875  | 2.299248  |
| 1 | 0 | -12.344883 | 2.530165  | 0.968016  |
| 1 | 0 | -8.483923  | -3.285684 | 1.893007  |
| 1 | 0 | -9.287201  | -4.018857 | 0.502818  |
| 1 | 0 | -5.526286  | 1.807524  | -0.598660 |
| 1 | 0 | -5.926923  | 1.748518  | -2.313755 |
| 6 | 0 | -10.535426 | 0.193100  | 0.180099  |
| 6 | 0 | -9.949406  | -1.062801 | 0.092616  |
| 6 | 0 | -8.646778  | 1.186776  | -1.014642 |
| 6 | 0 | -9.873596  | 1.336009  | -0.383253 |
| 6 | 0 | -8.039719  | -0.113095 | -1.103595 |
| 6 | 0 | -8.681386  | -1.216593 | -0.557599 |
| 6 | 0 | -11.347384 | 0.566578  | 1.262357  |
| 6 | 0 | -10.127727 | -2.044939 | 1.080768  |
| 6 | 0 | -7.670532  | 2.194972  | -1.004778 |
| 6 | 0 | -10.223383 | 2.507420  | 0.306805  |
| 6 | 0 | -6.646713  | -0.005294 | -1.162881 |
| 6 | 0 | -7.973103  | -2.308481 | -0.025372 |
| 6 | 0 | -11.648607 | -0.442403 | 2.189959  |
| 6 | 0 | -11.042034 | -1.740986 | 2.100175  |
| 6 | 0 | -8.050790  | 3.422162  | -0.440287 |
| 6 | 0 | -9.320225  | 3.577152  | 0.211990  |
| 6 | 0 | -5.904549  | -1.146911 | -0.765260 |
| 6 | 0 | -6.588022  | -2.296870 | -0.193619 |
| 1 | 0 | -12.248682 | -0.228659 | 3.070095  |
| 1 | 0 | -7.345539  | 4.245470  | -0.369961 |
| 1 | 0 | -9.503717  | 4.509608  | 0.738511  |
| 1 | 0 | -11.217639 | -2.435372 | 2.916993  |
| 1 | 0 | 7.219203   | 4.238041  | 0.595935  |
| 6 | 0 | 7.942396   | 3.473963  | 0.325117  |
| 6 | 0 | 7.572765   | 2.386149  | -0.480692 |
| 6 | 0 | 9.232004   | 3.527429  | 0.953771  |
| 6 | 0 | 6.213457   | 1.733839  | -0.885901 |
| 6 | 0 | 8.574181   | 1.438160  | -0.741047 |
| 6 | 0 | 10.166363  | 2.494275  | 0.784004  |
| 1 | 0 | 9.411201   | 4.329700  | 1.664155  |
| 1 | 0 | 5.456504   | 1.846443  | -0.101763 |
| 1 | 0 | 5.792897   | 2.175325  | -1.800045 |
| 6 | 0 | 6.602506   | 0.238977  | -1.083294 |
| 6 | 0 | 7.998921   | 0.168699  | -1.091962 |
| 6 | 0 | 9.820315   | 1.488785  | -0.132491 |
| 6 | 0 | 11.365420  | 1.949725  | 1.623792  |
| 6 | 0 | 6.641951   | -2.209334 | -0.636774 |
| 6 | 0 | 8.690048   | -1.004348 | -0.821020 |
| 6 | 0 | 10.533753  | 0.274344  | 0.145638  |
| 1 | 0 | 11.207324  | 2.102068  | 2.697231  |
| 1 | 0 | 12.311147  | 2.445514  | 1.363748  |

|   |   |           |           |           |
|---|---|-----------|-----------|-----------|
| 6 | 0 | 11.378120 | 0.431809  | 1.255531  |
| 6 | 0 | 5.906817  | -0.986952 | -0.922875 |
| 6 | 0 | 9.978083  | -0.951972 | -0.194419 |
| 6 | 0 | 8.032335  | -2.209340 | -0.517663 |
| 6 | 0 | 11.742790 | -0.743649 | 1.930018  |
| 6 | 0 | 10.221374 | -2.118574 | 0.548996  |
| 6 | 0 | 9.068485  | -3.118213 | 0.217177  |
| 6 | 0 | 11.167537 | -2.011888 | 1.579123  |
| 1 | 0 | 12.371861 | -0.705595 | 2.815017  |
| 1 | 0 | 8.643299  | -3.560607 | 1.124656  |
| 1 | 0 | 9.410498  | -3.947950 | -0.416917 |
| 1 | 0 | 11.393833 | -2.860543 | 2.218493  |
| 1 | 0 | 6.051266  | -3.087883 | -0.397478 |
| 1 | 0 | -5.960408 | -3.085552 | 0.208971  |
| 6 | 0 | 1.908908  | -1.056575 | -0.861915 |
| 6 | 0 | 0.673541  | -1.075661 | -0.846628 |
| 6 | 0 | 4.488464  | -1.022101 | -0.899128 |
| 6 | 0 | 3.258188  | -1.036391 | -0.879658 |
| 6 | 0 | -1.906114 | -1.103340 | -0.816821 |
| 6 | 0 | -0.670643 | -1.091998 | -0.830977 |
| 6 | 0 | -4.485698 | -1.137994 | -0.783480 |
| 6 | 0 | -3.255462 | -1.117999 | -0.799722 |

**Cor-A5-Cor**

|   |   |            |           |           |
|---|---|------------|-----------|-----------|
| 6 | 0 | 11.380277  | 0.914075  | -0.089155 |
| 6 | 0 | 11.295263  | -0.485292 | -0.316068 |
| 6 | 0 | 9.973677   | -0.780315 | -0.738326 |
| 6 | 0 | 9.239714   | 0.435496  | -0.774541 |
| 6 | 0 | 10.110790  | 1.483635  | -0.373325 |
| 6 | 0 | 12.281891  | 1.481748  | 0.799593  |
| 6 | 0 | 12.105743  | -1.408400 | 0.330304  |
| 6 | 0 | 9.376264   | -2.018888 | -0.547008 |
| 6 | 0 | 7.865978   | 0.503068  | -0.623361 |
| 6 | 0 | 9.661347   | 2.658980  | 0.210927  |
| 6 | 0 | 13.271939  | 0.555357  | 1.318469  |
| 6 | 0 | 13.188272  | -0.818747 | 1.095587  |
| 6 | 0 | 11.577006  | -2.761209 | 0.345442  |
| 6 | 0 | 10.280528  | -3.053118 | -0.072462 |
| 6 | 0 | 7.191525   | -0.802262 | -0.644961 |
| 6 | 0 | 7.936046   | -2.003206 | -0.603972 |
| 6 | 0 | 7.364362   | 1.798632  | -0.212975 |
| 6 | 0 | 8.220143   | 2.825662  | 0.183603  |
| 6 | 0 | 10.671398  | 3.371945  | 0.972067  |
| 6 | 0 | 11.916853  | 2.811981  | 1.252324  |
| 1 | 0 | 14.055248  | 0.926086  | 1.973914  |
| 1 | 0 | 13.908968  | -1.467532 | 1.585613  |
| 1 | 0 | 12.174713  | -3.560884 | 0.774046  |
| 1 | 0 | 9.913043   | -4.068665 | 0.044162  |
| 1 | 0 | 6.292707   | 1.948423  | -0.128152 |
| 1 | 0 | 7.782300   | 3.743751  | 0.565298  |
| 1 | 0 | 10.424499  | 4.333495  | 1.413516  |
| 1 | 0 | 12.595408  | 3.357658  | 1.902219  |
| 6 | 0 | -13.234127 | 0.876756  | 1.243272  |
| 6 | 0 | -13.115396 | -0.485218 | 1.518672  |
| 6 | 0 | -12.293745 | 1.573886  | 0.384421  |
| 6 | 0 | -12.044155 | -1.290878 | 0.962972  |
| 6 | 0 | -11.408472 | 0.741881  | -0.285605 |
| 6 | 0 | -11.954603 | 2.983869  | 0.317628  |
| 6 | 0 | -11.287982 | -0.645010 | -0.005320 |
| 6 | 0 | -11.473082 | -2.541366 | 1.432038  |
| 6 | 0 | -10.169385 | 1.193376  | -0.812241 |



|   |   |            |           |           |
|---|---|------------|-----------|-----------|
| 6 | 0 | -10.738999 | 3.427515  | -0.200894 |
| 1 | 0 | -12.625256 | 3.714197  | 0.761942  |
| 6 | 0 | -9.974728  | -1.049774 | -0.356844 |
| 6 | 0 | -10.184775 | -2.942000 | 1.084878  |
| 1 | 0 | -12.028724 | -3.145970 | 2.143492  |
| 6 | 0 | -9.281389  | 0.085377  | -0.855893 |
| 6 | 0 | -9.735936  | 2.506882  | -0.705086 |
| 1 | 0 | -10.506610 | 4.487221  | -0.141969 |
| 6 | 0 | -9.331876  | -2.129654 | 0.233236  |
| 1 | 0 | -9.781562  | -3.843967 | 1.536440  |
| 6 | 0 | -7.905834  | 0.224604  | -0.802267 |
| 6 | 0 | -8.302752  | 2.676417  | -0.856844 |
| 6 | 0 | -7.896037  | -2.111730 | 0.108182  |
| 6 | 0 | -7.430352  | 1.589448  | -0.902206 |
| 6 | 0 | -7.191832  | -0.991861 | -0.390177 |
| 1 | 0 | -7.880329  | 3.677266  | -0.846953 |
| 1 | 0 | -7.310034  | -2.944986 | 0.483575  |
| 1 | 0 | -6.361536  | 1.776916  | -0.925738 |
| 1 | 0 | -13.796285 | -0.929125 | 2.239618  |
| 1 | 0 | 7.381578   | -2.933528 | -0.528270 |
| 6 | 0 | 4.544620   | -0.878002 | -0.588881 |
| 6 | 0 | 5.775135   | -0.859899 | -0.613547 |
| 6 | 0 | 1.960848   | -0.932149 | -0.538868 |
| 6 | 0 | 3.196991   | -0.905566 | -0.562900 |
| 1 | 0 | -14.003700 | 1.443748  | 1.759858  |
| 6 | 0 | -0.617922  | -0.972059 | -0.490473 |
| 6 | 0 | 0.619950   | -0.955870 | -0.513034 |
| 6 | 0 | -1.959053  | -0.983904 | -0.468811 |
| 6 | 0 | -3.195565  | -0.990522 | -0.450566 |
| 6 | 0 | -4.543521  | -0.998234 | -0.428291 |
| 6 | 0 | -5.774113  | -1.011140 | -0.404148 |

**Sum-A5-Cor**

|   |   |            |           |           |
|---|---|------------|-----------|-----------|
| 6 | 0 | -10.573504 | -1.295924 | -0.310299 |
| 6 | 0 | -11.751243 | -0.602054 | 0.074555  |
| 6 | 0 | -11.528850 | 0.786289  | -0.124756 |
| 6 | 0 | -10.213749 | 0.950264  | -0.630492 |
| 6 | 0 | -9.621218  | -0.335750 | -0.745903 |
| 6 | 0 | -10.218302 | -2.530555 | 0.213458  |
| 6 | 0 | -12.649409 | -1.096705 | 1.009311  |
| 6 | 0 | -12.189302 | 1.770753  | 0.597406  |
| 6 | 0 | -9.473008  | 2.110652  | -0.450688 |
| 6 | 0 | -8.256178  | -0.555416 | -0.689911 |
| 6 | 0 | -11.248370 | -3.153924 | 1.024810  |
| 6 | 0 | -12.403703 | -2.472033 | 1.403659  |
| 6 | 0 | -13.496005 | -0.085761 | 1.616603  |
| 6 | 0 | -13.277135 | 1.277578  | 1.421121  |
| 6 | 0 | -11.515940 | 3.057701  | 0.608252  |
| 6 | 0 | -10.225553 | 3.220907  | 0.109322  |
| 6 | 0 | -7.873614  | -1.909688 | -0.345655 |
| 6 | 0 | -8.808949  | -2.850707 | 0.083548  |
| 1 | 0 | -11.080048 | -4.149987 | 1.424832  |
| 1 | 0 | -13.093785 | -2.961693 | 2.085261  |
| 1 | 0 | -14.270652 | -0.390172 | 2.315087  |
| 1 | 0 | -13.888890 | 1.984735  | 1.974439  |
| 1 | 0 | -11.992824 | 3.903392  | 1.095933  |
| 1 | 0 | -9.742078  | 4.186886  | 0.224381  |
| 1 | 0 | -6.821421  | -2.175959 | -0.336790 |
| 1 | 0 | -8.450283  | -3.821933 | 0.412704  |
| 1 | 0 | 13.215414  | -1.575337 | 2.799397  |
| 6 | 0 | 12.612628  | -1.443683 | 1.905153  |

|   |   |           |           |           |
|---|---|-----------|-----------|-----------|
| 6 | 0 | 11.890146 | -2.585458 | 1.418406  |
| 6 | 0 | 12.421597 | -0.170136 | 1.347630  |
| 6 | 0 | 10.968275 | -2.465870 | 0.368021  |
| 1 | 0 | 11.987398 | -3.515120 | 1.971938  |
| 6 | 0 | 12.593678 | 1.292657  | 1.867323  |
| 6 | 0 | 11.596033 | -0.105800 | 0.214399  |
| 6 | 0 | 9.707678  | -3.269698 | -0.081981 |
| 6 | 0 | 10.897659 | -1.209730 | -0.256728 |
| 6 | 0 | 11.498697 | 2.068951  | 1.068801  |
| 1 | 0 | 13.602278 | 1.683507  | 1.673017  |
| 1 | 0 | 12.426325 | 1.358428  | 2.948131  |
| 6 | 0 | 11.052255 | 1.212727  | 0.050058  |
| 6 | 0 | 8.817171  | -2.165652 | -0.735776 |
| 1 | 0 | 9.959458  | -4.068610 | -0.793288 |
| 1 | 0 | 9.204034  | -3.742326 | 0.768158  |
| 6 | 0 | 9.631559  | -1.031582 | -0.903913 |
| 6 | 0 | 10.700775 | 3.193681  | 1.328537  |
| 6 | 0 | 9.827329  | 1.385462  | -0.578697 |
| 6 | 0 | 9.104095  | 0.242538  | -1.065067 |
| 6 | 0 | 9.432868  | 3.271352  | 0.678869  |
| 1 | 0 | 10.962130 | 3.891669  | 2.118962  |
| 6 | 0 | 8.949011  | 2.425478  | -0.237898 |
| 6 | 0 | 7.728352  | 0.492773  | -1.068237 |
| 1 | 0 | 8.806595  | 4.192947  | 1.014817  |
| 6 | 0 | 7.528750  | 1.998705  | -0.726187 |
| 1 | 0 | 7.193630  | 2.578564  | -1.597360 |
| 1 | 0 | 6.771273  | 2.131629  | 0.054179  |
| 6 | 0 | -7.445640 | 0.669525  | -0.723970 |
| 6 | 0 | -8.049817 | 1.941989  | -0.605135 |
| 6 | 0 | 6.878049  | -0.642441 | -1.042536 |
| 6 | 0 | 7.442277  | -1.973239 | -0.873871 |
| 6 | 0 | 5.467162  | -0.497421 | -1.035131 |
| 6 | 0 | 4.243619  | -0.362204 | -1.022324 |
| 6 | 0 | 2.901820  | -0.230415 | -1.007607 |
| 6 | 0 | 1.670217  | -0.116905 | -0.993920 |
| 6 | 0 | 0.335244  | 0.009699  | -0.971725 |
| 6 | 0 | -0.897144 | 0.127078  | -0.942129 |
| 6 | 0 | -2.232259 | 0.247636  | -0.905785 |
| 6 | 0 | -3.464371 | 0.349277  | -0.870629 |
| 6 | 0 | -4.807149 | 0.460396  | -0.826986 |
| 6 | 0 | -6.032077 | 0.573417  | -0.780961 |
| 1 | 0 | 6.737591  | -2.787176 | -0.736442 |
| 1 | 0 | -7.392884 | 2.804152  | -0.543426 |

**Sum-A5-Sum**

|   |   |            |           |           |
|---|---|------------|-----------|-----------|
| 6 | 0 | -12.671890 | 2.193676  | 1.265527  |
| 6 | 0 | -10.250227 | -3.003413 | 1.014698  |
| 6 | 0 | -7.587735  | 1.521105  | -1.298949 |
| 1 | 0 | -12.488725 | 2.600060  | 2.266426  |
| 1 | 0 | -13.640358 | 2.589699  | 0.929276  |
| 1 | 0 | -9.785873  | -3.208058 | 1.985504  |
| 1 | 0 | -10.582402 | -3.967702 | 0.605691  |
| 1 | 0 | -6.814109  | 1.835929  | -0.589817 |
| 1 | 0 | -7.206858  | 1.743814  | -2.305301 |
| 6 | 0 | -11.827490 | 0.237759  | 0.195796  |
| 6 | 0 | -11.241536 | -1.019794 | 0.135431  |
| 6 | 0 | -9.932804  | 1.207943  | -1.008576 |
| 6 | 0 | -11.162688 | 1.369462  | -0.386239 |
| 6 | 0 | -9.325752  | -0.093508 | -1.069282 |
| 6 | 0 | -9.970256  | -1.186129 | -0.504933 |
| 6 | 0 | -12.644790 | 0.632103  | 1.266544  |

|   |   |            |           |           |
|---|---|------------|-----------|-----------|
| 6 | 0 | -11.425103 | -1.982780 | 1.141318  |
| 6 | 0 | -8.956381  | 2.215909  | -1.013393 |
| 6 | 0 | -11.515601 | 2.553980  | 0.279382  |
| 6 | 0 | -7.932582  | 0.012759  | -1.124240 |
| 6 | 0 | -9.265163  | -2.268183 | 0.051294  |
| 6 | 0 | -12.951010 | -0.358893 | 2.211774  |
| 6 | 0 | -12.344441 | -1.659125 | 2.150082  |
| 6 | 0 | -9.339028  | 3.453799  | -0.474441 |
| 6 | 0 | -10.611605 | 3.621469  | 0.168480  |
| 6 | 0 | -7.193079  | -1.121985 | -0.701924 |
| 6 | 0 | -7.879508  | -2.260686 | -0.111145 |
| 1 | 0 | -13.555527 | -0.128154 | 3.084527  |
| 1 | 0 | -8.633945  | 4.278187  | -0.416528 |
| 1 | 0 | -10.797420 | 4.563931  | 0.675997  |
| 1 | 0 | -12.524400 | -2.337654 | 2.979150  |
| 1 | 0 | 8.515967   | 4.279287  | 0.614977  |
| 6 | 0 | 9.237699   | 3.513811  | 0.344299  |
| 6 | 0 | 8.864991   | 2.424251  | -0.457728 |
| 6 | 0 | 10.528989  | 3.567641  | 0.969430  |
| 6 | 0 | 7.504012   | 1.772092  | -0.857506 |
| 6 | 0 | 9.864830   | 1.474739  | -0.718265 |
| 6 | 0 | 11.461956  | 2.533166  | 0.799938  |
| 1 | 0 | 10.710780  | 4.371587  | 1.677225  |
| 1 | 0 | 6.749270   | 1.887597  | -0.071678 |
| 1 | 0 | 7.081463   | 2.211348  | -1.771795 |
| 6 | 0 | 7.891286   | 0.276405  | -1.051993 |
| 6 | 0 | 9.287508   | 0.204849  | -1.064196 |
| 6 | 0 | 11.112573  | 1.525693  | -0.113086 |
| 6 | 0 | 12.662668  | 1.989631  | 1.637982  |
| 6 | 0 | 7.930014   | -2.171657 | -0.600075 |
| 6 | 0 | 9.978176   | -0.968193 | -0.791763 |
| 6 | 0 | 11.825501  | 0.311304  | 0.166324  |
| 1 | 0 | 12.507488  | 2.144809  | 2.711429  |
| 1 | 0 | 13.608170  | 2.483865  | 1.374252  |
| 6 | 0 | 12.672995  | 0.470800  | 1.273505  |
| 6 | 0 | 7.195294   | -0.949030 | -0.887233 |
| 6 | 0 | 11.267979  | -0.915462 | -0.169184 |
| 6 | 0 | 9.320501   | -2.172256 | -0.484175 |
| 6 | 0 | 13.038452  | -0.703369 | 1.949845  |
| 6 | 0 | 11.512313  | -2.080511 | 0.576358  |
| 6 | 0 | 10.357995  | -3.080177 | 0.249853  |
| 6 | 0 | 12.461296  | -1.972044 | 1.603677  |
| 1 | 0 | 13.669953  | -0.663672 | 2.833023  |
| 1 | 0 | 9.934939   | -3.520384 | 1.159372  |
| 1 | 0 | 10.697755  | -3.911431 | -0.383430 |
| 1 | 0 | 12.688735  | -2.819282 | 2.244479  |
| 1 | 0 | 7.339204   | -3.049284 | -0.357795 |
| 1 | 0 | -7.254091  | -3.042071 | 0.308689  |
| 6 | 0 | 3.198634   | -1.015184 | -0.818998 |
| 6 | 0 | 1.962053   | -1.032493 | -0.802525 |
| 6 | 0 | 5.777504   | -0.983165 | -0.860524 |
| 6 | 0 | 4.546760   | -0.996958 | -0.838582 |
| 6 | 0 | -0.617479  | -1.061972 | -0.770754 |
| 6 | 0 | 0.620684   | -1.049082 | -0.785443 |
| 6 | 0 | -3.195648  | -1.083426 | -0.743920 |
| 6 | 0 | -1.958937  | -1.073659 | -0.756442 |
| 6 | 0 | -5.774702  | -1.114846 | -0.715784 |
| 6 | 0 | -4.543898  | -1.096772 | -0.729180 |

**Cor-B1-Cor**

|   |   |          |           |           |
|---|---|----------|-----------|-----------|
| 6 | 0 | 5.740751 | -0.000001 | -0.223464 |
|---|---|----------|-----------|-----------|

|   |   |           |           |           |
|---|---|-----------|-----------|-----------|
| 6 | 0 | 4.936838  | -1.149102 | -0.441032 |
| 6 | 0 | 3.635443  | -0.716911 | -0.793653 |
| 6 | 0 | 3.635443  | 0.716909  | -0.793652 |
| 6 | 0 | 4.936839  | 1.149099  | -0.441036 |
| 6 | 0 | 6.860686  | -0.000001 | 0.593892  |
| 6 | 0 | 5.201817  | -2.380243 | 0.145641  |
| 6 | 0 | 2.507546  | -1.483372 | -0.590934 |
| 6 | 0 | 2.507547  | 1.483371  | -0.590931 |
| 6 | 0 | 5.201821  | 2.380243  | 0.145633  |
| 6 | 0 | 7.266509  | -1.319050 | 1.046752  |
| 6 | 0 | 6.478958  | -2.449240 | 0.833510  |
| 6 | 0 | 4.061286  | -3.266919 | 0.191313  |
| 6 | 0 | 2.777311  | -2.836827 | -0.157031 |
| 6 | 0 | 1.236169  | -0.731419 | -0.635085 |
| 6 | 0 | 1.236170  | 0.731418  | -0.635083 |
| 6 | 0 | 2.777314  | 2.836825  | -0.157026 |
| 6 | 0 | 4.061290  | 3.266919  | 0.191308  |
| 6 | 0 | 6.478965  | 2.449241  | 0.833497  |
| 6 | 0 | 7.266513  | 1.319051  | 1.046744  |
| 1 | 0 | 8.169145  | -1.422487 | 1.642776  |
| 1 | 0 | 6.796982  | -3.391492 | 1.271456  |
| 1 | 0 | 4.178227  | -4.270963 | 0.589851  |
| 1 | 0 | 1.954159  | -3.529098 | -0.007926 |
| 1 | 0 | 1.954162  | 3.529097  | -0.007922 |
| 1 | 0 | 4.178233  | 4.270964  | 0.589843  |
| 1 | 0 | 6.796991  | 3.391495  | 1.271439  |
| 1 | 0 | 8.169149  | 1.422488  | 1.642768  |
| 6 | 0 | -1.236170 | -0.731419 | -0.635085 |
| 6 | 0 | -1.236169 | 0.731419  | -0.635083 |
| 6 | 0 | -2.507547 | -1.483371 | -0.590934 |
| 6 | 0 | -2.507546 | 1.483372  | -0.590931 |
| 6 | 0 | -3.635443 | -0.716909 | -0.793653 |
| 6 | 0 | -2.777313 | -2.836825 | -0.157031 |
| 6 | 0 | -3.635443 | 0.716911  | -0.793652 |
| 6 | 0 | -2.777312 | 2.836826  | -0.157026 |
| 6 | 0 | -4.936839 | -1.149100 | -0.441035 |
| 6 | 0 | -4.061289 | -3.266919 | 0.191308  |
| 1 | 0 | -1.954161 | -3.529098 | -0.007927 |
| 6 | 0 | -4.936838 | 1.149102  | -0.441033 |
| 6 | 0 | -4.061288 | 3.266919  | 0.191313  |
| 1 | 0 | -1.954160 | 3.529098  | -0.007921 |
| 6 | 0 | -5.740751 | 0.000000  | -0.223464 |
| 6 | 0 | -5.201819 | -2.380242 | 0.145636  |
| 1 | 0 | -4.178231 | -4.270964 | 0.589843  |
| 6 | 0 | -5.201818 | 2.380244  | 0.145639  |
| 1 | 0 | -4.178229 | 4.270964  | 0.589850  |
| 6 | 0 | -6.860686 | 0.000000  | 0.593892  |
| 6 | 0 | -6.478962 | -2.449240 | 0.833502  |
| 6 | 0 | -6.478961 | 2.449241  | 0.833504  |
| 6 | 0 | -7.266512 | -1.319050 | 1.046747  |
| 6 | 0 | -7.266511 | 1.319051  | 1.046749  |
| 1 | 0 | -6.796987 | -3.391493 | 1.271445  |
| 1 | 0 | -6.796986 | 3.391494  | 1.271449  |
| 1 | 0 | -8.169148 | -1.422488 | 1.642771  |
| 1 | 0 | -8.169147 | 1.422488  | 1.642773  |
| 6 | 0 | 0.000000  | -1.390210 | -0.628032 |
| 6 | 0 | 0.000000  | 1.390210  | -0.628029 |
| 1 | 0 | 0.000000  | -2.475514 | -0.640281 |
| 1 | 0 | 0.000001  | 2.475514  | -0.640276 |

**Sum-B1-Cor**

|   |   |           |           |           |                   |   |           |           |           |
|---|---|-----------|-----------|-----------|-------------------|---|-----------|-----------|-----------|
| 6 | 0 | -5.103953 | -1.149493 | -0.362679 | 1                 | 0 | -0.193026 | 2.483958  | -0.872545 |
| 6 | 0 | -5.893029 | -0.000088 | -0.096858 |                   |   |           |           |           |
| 6 | 0 | -5.104033 | 1.149332  | -0.362857 |                   |   |           |           |           |
| 6 | 0 | -3.827029 | 0.718346  | -0.793975 |                   |   |           |           |           |
| 6 | 0 | -3.826982 | -0.718494 | -0.793848 |                   |   |           |           |           |
| 6 | 0 | -5.335631 | -2.381757 | 0.237205  |                   |   |           |           |           |
| 6 | 0 | -6.963246 | -0.000060 | 0.784322  |                   |   |           |           |           |
| 6 | 0 | -5.335813 | 2.381672  | 0.236819  |                   |   |           |           |           |
| 6 | 0 | -2.690648 | 1.486096  | -0.661145 |                   |   |           |           |           |
| 6 | 0 | -2.690543 | -1.486146 | -0.660938 |                   |   |           |           |           |
| 6 | 0 | -6.570370 | -2.450005 | 0.998577  |                   |   |           |           |           |
| 6 | 0 | -7.343052 | -1.319446 | 1.258715  |                   |   |           |           |           |
| 6 | 0 | -7.343150 | 1.319372  | 1.258506  |                   |   |           |           |           |
| 6 | 0 | -6.570553 | 2.449945  | 0.998185  |                   |   |           |           |           |
| 6 | 0 | -4.196025 | 3.268394  | 0.214365  |                   |   |           |           |           |
| 6 | 0 | -2.934717 | 2.838003  | -0.210629 |                   |   |           |           |           |
| 6 | 0 | -2.934494 | -2.837971 | -0.210124 |                   |   |           |           |           |
| 6 | 0 | -4.195781 | -3.268391 | 0.214907  |                   |   |           |           |           |
| 1 | 0 | -6.863330 | -3.392605 | 1.453092  |                   |   |           |           |           |
| 1 | 0 | -8.209868 | -1.422657 | 1.905815  |                   |   |           |           |           |
| 1 | 0 | -8.209968 | 1.422614  | 1.905598  |                   |   |           |           |           |
| 1 | 0 | -6.863571 | 3.392596  | 1.452556  |                   |   |           |           |           |
| 1 | 0 | -4.288932 | 4.272349  | 0.619564  |                   |   |           |           |           |
| 1 | 0 | -2.103851 | 3.529945  | -0.110260 |                   |   |           |           |           |
| 1 | 0 | -2.103551 | -3.529794 | -0.109582 |                   |   |           |           |           |
| 1 | 0 | -4.288618 | -4.272262 | 0.620329  |                   |   |           |           |           |
| 1 | 0 | 6.841157  | -2.984347 | 2.098294  |                   |   |           |           |           |
| 6 | 0 | 6.261768  | -2.530268 | 1.299184  |                   |   |           |           |           |
| 6 | 0 | 5.119361  | -3.249168 | 0.815912  |                   |   |           |           |           |
| 6 | 0 | 6.530028  | -1.219492 | 0.869113  |                   |   |           |           |           |
| 6 | 0 | 4.230477  | -2.664693 | -0.102058 |                   |   |           |           |           |
| 1 | 0 | 4.896088  | -4.207944 | 1.275639  |                   |   |           |           |           |
| 6 | 0 | 7.295884  | -0.000067 | 1.474453  |                   |   |           |           |           |
| 6 | 0 | 5.704837  | -0.719420 | -0.147544 |                   |   |           |           |           |
| 6 | 0 | 2.723601  | -2.866187 | -0.453282 |                   |   |           |           |           |
| 6 | 0 | 4.599322  | -1.413378 | -0.613588 |                   |   |           |           |           |
| 6 | 0 | 6.530012  | 1.219441  | 0.869303  |                   |   |           |           |           |
| 1 | 0 | 8.359236  | -0.000029 | 1.196548  |                   |   |           |           |           |
| 1 | 0 | 7.250622  | -0.000148 | 2.569353  |                   |   |           |           |           |
| 6 | 0 | 5.704839  | 0.719519  | -0.147429 |                   |   |           |           |           |
| 6 | 0 | 2.296331  | -1.451126 | -0.953838 |                   |   |           |           |           |
| 1 | 0 | 2.573183  | -3.643407 | -1.216058 |                   |   |           |           |           |
| 1 | 0 | 2.147015  | -3.168279 | 0.429038  |                   |   |           |           |           |
| 6 | 0 | 3.447498  | -0.702914 | -1.106350 |                   |   |           |           |           |
| 6 | 0 | 6.261705  | 2.530144  | 1.299617  |                   |   |           |           |           |
| 6 | 0 | 4.599301  | 1.413535  | -0.613373 |                   |   |           |           |           |
| 6 | 0 | 3.447474  | 0.703123  | -1.106168 |                   |   |           |           |           |
| 6 | 0 | 5.119294  | 3.249100  | 0.816474  |                   |   |           |           |           |
| 1 | 0 | 6.841075  | 2.984089  | 2.098820  |                   |   |           |           |           |
| 6 | 0 | 4.230457  | 2.664758  | -0.101646 |                   |   |           |           |           |
| 6 | 0 | 2.296274  | 1.451305  | -0.953504 |                   |   |           |           |           |
| 1 | 0 | 4.895987  | 4.207798  | 1.276342  |                   |   |           |           |           |
| 6 | 0 | 2.723578  | 2.866306  | -0.452798 |                   |   |           |           |           |
| 1 | 0 | 2.573074  | 3.643641  | -1.215439 |                   |   |           |           |           |
| 1 | 0 | 2.147076  | 3.168277  | 0.429619  |                   |   |           |           |           |
| 6 | 0 | -1.419014 | -0.738454 | -0.789932 |                   |   |           |           |           |
| 6 | 0 | -0.197067 | -1.397959 | -0.864914 |                   |   |           |           |           |
| 6 | 0 | -1.419072 | 0.738485  | -0.789941 |                   |   |           |           |           |
| 6 | 0 | 1.050771  | -0.739422 | -0.960348 |                   |   |           |           |           |
| 1 | 0 | -0.192983 | -2.483891 | -0.872894 |                   |   |           |           |           |
| 6 | 0 | -0.197143 | 1.398026  | -0.864723 |                   |   |           |           |           |
| 6 | 0 | 1.050730  | 0.739512  | -0.960141 |                   |   |           |           |           |
|   |   |           |           |           | <b>Sum-B1-Sum</b> |   |           |           |           |
| 6 | 0 | 7.352163  | 0.000055  | 1.672073  | 6                 | 0 | 7.352163  | 0.000055  | 1.672073  |
| 6 | 0 | 2.888356  | 2.865439  | -0.490716 | 6                 | 0 | 2.888356  | 2.865439  | -0.490716 |
| 6 | 0 | 2.888468  | -2.865432 | -0.490801 | 6                 | 0 | 2.888468  | -2.865432 | -0.490801 |
| 1 | 0 | 7.247805  | 0.000032  | 2.763008  | 1                 | 0 | 7.247805  | 0.000032  | 2.763008  |
| 1 | 0 | 8.429043  | 0.000082  | 1.452224  | 1                 | 0 | 8.429043  | 0.000082  | 1.452224  |
| 1 | 0 | 2.266047  | 3.159882  | 0.362853  | 1                 | 0 | 2.266047  | 3.159882  | 0.362853  |
| 1 | 0 | 2.774564  | 3.647981  | -1.254504 | 1                 | 0 | 2.774564  | 3.647981  | -1.254504 |
| 1 | 0 | 2.266174  | -3.159922 | 0.362763  | 1                 | 0 | 2.266174  | -3.159922 | 0.362763  |
| 1 | 0 | 2.774694  | -3.647952 | -1.254614 | 1                 | 0 | 2.774694  | -3.647952 | -1.254614 |
| 6 | 0 | 5.848457  | 0.719989  | -0.030740 | 6                 | 0 | 5.848457  | 0.719989  | -0.030740 |
| 6 | 0 | 4.768742  | 1.413572  | -0.553533 | 6                 | 0 | 4.768742  | 1.413572  | -0.553533 |
| 6 | 0 | 4.768800  | -1.413492 | -0.553583 | 6                 | 0 | 4.768800  | -1.413492 | -0.553583 |
| 6 | 0 | 5.848488  | -0.719883 | -0.030767 | 6                 | 0 | 5.848488  | -0.719883 | -0.030767 |
| 6 | 0 | 3.643628  | -0.705410 | -1.110132 | 6                 | 0 | 3.643628  | -0.705410 | -1.110132 |
| 6 | 0 | 3.643601  | 0.705465  | -1.110109 | 6                 | 0 | 3.643601  | 0.705465  | -1.110109 |
| 6 | 0 | 6.619771  | 1.219699  | 1.026832  | 6                 | 0 | 6.619771  | 1.219699  | 1.026832  |
| 6 | 0 | 4.375001  | 2.665037  | -0.062456 | 6                 | 0 | 4.375001  | 2.665037  | -0.062456 |
| 6 | 0 | 4.375110  | -2.664990 | -0.062549 | 6                 | 0 | 4.375110  | -2.664990 | -0.062549 |
| 6 | 0 | 6.619824  | -1.219598 | 1.026786  | 6                 | 0 | 6.619824  | -1.219598 | 1.026786  |
| 6 | 0 | 2.490474  | -1.453082 | -1.020472 | 6                 | 0 | 2.490474  | -1.453082 | -1.020472 |
| 6 | 0 | 2.490416  | 1.453090  | -1.020431 | 6                 | 0 | 2.490416  | 1.453090  | -1.020431 |
| 6 | 0 | 6.331144  | 2.531663  | 1.441667  | 6                 | 0 | 6.331144  | 2.531663  | 1.441667  |
| 6 | 0 | 5.216118  | 3.250476  | 0.899577  | 6                 | 0 | 5.216118  | 3.250476  | 0.899577  |
| 6 | 0 | 5.216254  | -3.250428 | 0.899461  | 6                 | 0 | 5.216254  | -3.250428 | 0.899461  |
| 6 | 0 | 6.331253  | -2.531589 | 1.441575  | 6                 | 0 | 6.331253  | -2.531589 | 1.441575  |
| 6 | 0 | 1.238788  | -0.744457 | -1.103863 | 6                 | 0 | 1.238788  | -0.744457 | -1.103863 |
| 6 | 0 | 1.238764  | 0.744417  | -1.103842 | 6                 | 0 | 1.238764  | 0.744417  | -1.103842 |
| 1 | 0 | 6.869878  | 2.986161  | 2.268551  | 1                 | 0 | 6.869878  | 2.986161  | 2.268551  |
| 1 | 0 | 4.970431  | -4.210289 | 1.345321  | 1                 | 0 | 4.970431  | -4.210289 | 1.345321  |
| 1 | 0 | 6.870006  | -2.986095 | 2.268440  | 1                 | 0 | 6.870006  | -2.986095 | 2.268440  |
| 1 | 0 | 4.970254  | 4.210311  | 1.345470  | 1                 | 0 | 4.970254  | 4.210311  | 1.345470  |
| 1 | 0 | -4.970352 | -4.210230 | 1.345724  | 1                 | 0 | -4.970352 | -4.210230 | 1.345724  |
| 6 | 0 | -5.216118 | -3.250407 | 0.899741  | 6                 | 0 | -5.216118 | -3.250407 | 0.899741  |
| 6 | 0 | -4.374903 | -2.665028 | -0.062242 | 6                 | 0 | -4.374903 | -2.665028 | -0.062242 |
| 6 | 0 | -6.331253 | -2.531597 | 1.441610  | 6                 | 0 | -6.331253 | -2.531597 | 1.441610  |
| 6 | 0 | -2.888241 | -2.865447 | -0.490485 | 6                 | 0 | -2.888241 | -2.865447 | -0.490485 |
| 6 | 0 | -4.768623 | -1.413594 | -0.553442 | 6                 | 0 | -4.768623 | -1.413594 | -0.553442 |
| 6 | 0 | -6.619916 | -1.219689 | 1.026592  | 6                 | 0 | -6.619916 | -1.219689 | 1.026592  |
| 1 | 0 | -6.870144 | -2.986128 | 2.268374  | 1                 | 0 | -6.870144 | -2.986128 | 2.268374  |
| 1 | 0 | -2.265951 | -3.160113 | 0.363006  | 1                 | 0 | -2.265951 | -3.160113 | 0.363006  |
| 1 | 0 | -2.774522 | -3.647855 | -1.254447 | 1                 | 0 | -2.774522 | -3.647855 | -1.254447 |
| 6 | 0 | -2.490246 | -1.453072 | -1.020045 | 6                 | 0 | -2.490246 | -1.453072 | -1.020045 |
| 6 | 0 | -3.643417 | -0.705472 | -1.109834 | 6                 | 0 | -3.643417 | -0.705472 | -1.109834 |
| 6 | 0 | -5.848424 | -0.719998 | -0.030851 | 6                 | 0 | -5.848424 | -0.719998 | -0.030851 |
| 6 | 0 | -7.352615 | -0.000043 | 1.671457  | 6                 | 0 | -7.352615 | -0.000043 | 1.671457  |
| 6 | 0 | -1.238648 | 0.744409  | -1.103630 | 6                 | 0 | -1.238648 | 0.744409  | -1.103630 |
| 6 | 0 | -3.643419 | 0.705407  | -1.109833 | 6                 | 0 | -3.643419 | 0.705407  | -1.109833 |
| 6 | 0 | -5.848458 | 0.719872  | -0.030901 | 6                 | 0 | -5.848458 | 0.719872  | -0.030901 |
| 1 | 0 | -7.248727 | 0.000032  | 2.762425  | 1                 | 0 | -7.248727 | 0.000032  | 2.762425  |
| 1 | 0 | -8.429404 | -0.000129 | 1.451131  | 1                 | 0 | -8.429404 | -0.000129 | 1.451131  |
| 6 | 0 | -6.620070 | 1.219609  | 1.026426  | 6                 | 0 | -6.620070 | 1.219609  | 1.026426  |
| 6 | 0 | -1.238618 | -0.744431 | -1.103637 | 6                 | 0 | -1.238618 | -0.744431 | -1.103637 |
| 6 | 0 | -4.768661 | 1.413497  | -0.553443 | 6                 | 0 | -4.768661 | 1.413497  | -0.553443 |
| 6 | 0 | -2.490288 | 1.453021  | -1.020003 | 6                 | 0 | -2.490288 | 1.453021  | -1.020003 |
| 6 | 0 | -6.331624 | 2.531630  | 1.441232  | 6                 | 0 | -6.331624 | 2.531630  | 1.441232  |
| 6 | 0 | -4.375053 | 2.665002  | -0.062345 | 6                 | 0 | -4.375053 | 2.665002  | -0.062345 |
| 6 | 0 | -2.888288 | 2.865364  | -0.490299 | 6                 | 0 | -2.888288 | 2.865364  | -0.490299 |
| 6 | 0 | -5.216519 | 3.250472  | 0.899366  | 6                 | 0 | -5.216519 | 3.250472  | 0.899366  |

|   |   |           |           |           |
|---|---|-----------|-----------|-----------|
| 1 | 0 | -6.870611 | 2.986193  | 2.267914  |
| 1 | 0 | -2.266058 | 3.159884  | 0.363283  |
| 1 | 0 | -2.774466 | 3.647853  | -1.254156 |
| 1 | 0 | -4.970844 | 4.210344  | 1.345298  |
| 6 | 0 | 0.000084  | -1.404894 | -1.091749 |
| 6 | 0 | 0.000047  | 1.404846  | -1.091704 |
| 1 | 0 | 0.000036  | -2.491396 | -1.096918 |
| 1 | 0 | 0.000046  | 2.491354  | -1.096896 |

**Cor-B2-Cor**

|   |   |           |           |           |
|---|---|-----------|-----------|-----------|
| 6 | 0 | 6.169962  | 1.149439  | -0.391352 |
| 6 | 0 | 4.864747  | 0.718733  | -0.726452 |
| 6 | 0 | 4.864752  | -0.718781 | -0.726407 |
| 6 | 0 | 6.169974  | -1.149460 | -0.391298 |
| 6 | 0 | 6.976285  | 0.000000  | -0.184783 |
| 6 | 0 | 6.446092  | 2.382197  | 0.188430  |
| 6 | 0 | 3.742318  | 1.487622  | -0.512189 |
| 6 | 0 | 3.742330  | -1.487666 | -0.512090 |
| 6 | 0 | 6.446115  | -2.382187 | 0.188547  |
| 6 | 0 | 8.109821  | 0.000023  | 0.613220  |
| 6 | 0 | 5.308198  | 3.269293  | 0.249862  |
| 6 | 0 | 4.018614  | 2.839245  | -0.080798 |
| 6 | 0 | 4.018635  | -2.839264 | -0.080630 |
| 6 | 0 | 5.308228  | -3.269290 | 0.250027  |
| 6 | 0 | 7.734335  | -2.450217 | 0.855705  |
| 6 | 0 | 8.524043  | -1.319566 | 1.057525  |
| 6 | 0 | 8.524027  | 1.319636  | 1.057466  |
| 6 | 0 | 7.734309  | 2.450270  | 0.855587  |
| 1 | 0 | 5.430899  | 4.273227  | 0.646942  |
| 1 | 0 | 3.197407  | 3.531110  | 0.080534  |
| 1 | 0 | 3.197435  | -3.531129 | 0.080736  |
| 1 | 0 | 5.430940  | -4.273204 | 0.647156  |
| 1 | 0 | 8.060721  | -3.392814 | 1.286726  |
| 1 | 0 | 9.436757  | -1.422962 | 1.637999  |
| 1 | 0 | 9.436739  | 1.423068  | 1.637937  |
| 1 | 0 | 8.060687  | 3.392892  | 1.286560  |
| 6 | 0 | -3.742077 | -1.487768 | -0.511616 |
| 6 | 0 | -3.742038 | 1.487812  | -0.511641 |
| 6 | 0 | -4.864486 | -0.718711 | -0.725419 |
| 6 | 0 | -4.018522 | -2.839203 | -0.080175 |
| 6 | 0 | -4.864439 | 0.718741  | -0.725370 |
| 6 | 0 | -4.018360 | 2.839286  | -0.080201 |
| 6 | 0 | -6.169698 | -1.149314 | -0.390484 |
| 6 | 0 | -5.308413 | -3.269330 | 0.250088  |
| 1 | 0 | -3.197828 | -3.531692 | 0.080860  |
| 6 | 0 | -6.169633 | 1.149416  | -0.390399 |
| 6 | 0 | -5.308229 | 3.269355  | 0.250264  |
| 1 | 0 | -3.197578 | 3.531634  | 0.080946  |
| 6 | 0 | -6.976193 | 0.000073  | -0.184241 |
| 6 | 0 | -6.446162 | -2.382312 | 0.188692  |
| 1 | 0 | -5.430843 | -4.273428 | 0.646837  |
| 6 | 0 | -6.446020 | 2.382369  | 0.188820  |
| 1 | 0 | -5.430634 | 4.273405  | 0.647085  |
| 6 | 0 | -8.110321 | 0.000049  | 0.612693  |
| 6 | 0 | -7.735021 | -2.450311 | 0.854844  |
| 6 | 0 | -7.734843 | 2.450332  | 0.855054  |
| 6 | 0 | -8.524923 | -1.319766 | 1.056209  |
| 6 | 0 | -8.524804 | 1.319825  | 1.056398  |
| 1 | 0 | -8.061708 | -3.392981 | 1.285493  |
| 1 | 0 | -8.061516 | 3.393008  | 1.285722  |
| 1 | 0 | -9.438093 | -1.423331 | 1.635926  |

|   |   |           |           |           |
|---|---|-----------|-----------|-----------|
| 1 | 0 | -9.437976 | 1.423424  | 1.636108  |
| 6 | 0 | -2.462769 | -0.741909 | -0.552488 |
| 6 | 0 | -1.241174 | -1.401079 | -0.547051 |
| 6 | 0 | -2.462798 | 0.741798  | -0.552520 |
| 6 | 0 | 0.000255  | -0.718384 | -0.544968 |
| 1 | 0 | -1.224796 | -2.487228 | -0.555063 |
| 6 | 0 | -1.241126 | 1.400914  | -0.547114 |
| 6 | 0 | 1.241490  | -1.401108 | -0.546889 |
| 6 | 0 | 0.000283  | 0.718245  | -0.545015 |
| 1 | 0 | -1.224594 | 2.487077  | -0.555168 |
| 6 | 0 | 2.463142  | -0.741843 | -0.552402 |
| 1 | 0 | 1.225451  | -2.487289 | -0.554600 |
| 6 | 0 | 1.241475  | 1.401023  | -0.546978 |
| 6 | 0 | 2.463137  | 0.741775  | -0.552455 |
| 1 | 0 | 1.225434  | 2.487201  | -0.554756 |

**Sum-B2-Cor**

|   |   |           |           |           |
|---|---|-----------|-----------|-----------|
| 6 | 0 | 6.350999  | 1.149628  | -0.297694 |
| 6 | 0 | 7.145195  | 0.000015  | -0.048602 |
| 6 | 0 | 6.351004  | -1.149594 | -0.297734 |
| 6 | 0 | 5.065610  | -0.719471 | -0.701568 |
| 6 | 0 | 5.065608  | 0.719520  | -0.701519 |
| 6 | 0 | 6.597295  | 2.382848  | 0.295341  |
| 6 | 0 | 8.235493  | 0.000003  | 0.807384  |
| 6 | 0 | 6.597323  | -2.382832 | 0.295239  |
| 6 | 0 | 3.934024  | -1.488923 | -0.546716 |
| 6 | 0 | 3.934010  | 1.488957  | -0.546670 |
| 6 | 0 | 7.849071  | 2.450545  | 1.028486  |
| 6 | 0 | 8.626675  | 1.319699  | 1.271895  |
| 6 | 0 | 8.626683  | -1.319707 | 1.271848  |
| 6 | 0 | 7.849088  | -2.450549 | 1.028392  |
| 6 | 0 | 5.458476  | -3.269886 | 0.297356  |
| 6 | 0 | 4.187744  | -2.839688 | -0.100502 |
| 6 | 0 | 4.187718  | 2.839696  | -0.100368 |
| 6 | 0 | 5.458459  | 3.269893  | 0.297483  |
| 1 | 0 | 8.153086  | 3.393306  | 1.475333  |
| 1 | 0 | 9.508175  | 1.422967  | 1.898821  |
| 1 | 0 | 9.508189  | -1.422988 | 1.898764  |
| 1 | 0 | 8.153108  | -3.393330 | 1.475189  |
| 1 | 0 | 5.560167  | -4.273635 | 0.700894  |
| 1 | 0 | 3.358980  | -3.531137 | 0.018643  |
| 1 | 0 | 3.358953  | 3.531139  | 0.018799  |
| 1 | 0 | 5.560149  | 4.273620  | 0.701075  |
| 1 | 0 | -8.064881 | 2.986053  | 2.173512  |
| 6 | 0 | -7.484518 | 2.531666  | 1.375288  |
| 6 | 0 | -6.343634 | 3.250692  | 0.891005  |
| 6 | 0 | -7.751375 | 1.219466  | 0.946356  |
| 6 | 0 | -5.454416 | 2.665255  | -0.027015 |
| 1 | 0 | -6.121048 | 4.210635  | 1.348609  |
| 6 | 0 | -8.515921 | 0.000029  | 1.553150  |
| 6 | 0 | -6.927100 | 0.719969  | -0.070382 |
| 6 | 0 | -3.948385 | 2.865934  | -0.379093 |
| 6 | 0 | -5.822539 | 1.413916  | -0.537468 |
| 6 | 0 | -7.751379 | -1.219435 | 0.946408  |
| 1 | 0 | -9.579987 | 0.000018  | 1.278023  |
| 1 | 0 | -8.467982 | 0.000052  | 2.647990  |
| 6 | 0 | -6.927106 | -0.719985 | -0.070354 |
| 6 | 0 | -3.524441 | 1.454476  | -0.889985 |
| 1 | 0 | -3.795588 | 3.649295  | -1.135141 |
| 1 | 0 | -3.369750 | 3.158951  | 0.505152  |
| 6 | 0 | -4.670052 | 0.706078  | -1.036276 |

|   |   |           |           |           |   |   |          |           |           |
|---|---|-----------|-----------|-----------|---|---|----------|-----------|-----------|
| 6 | 0 | -7.484506 | -2.531606 | 1.375420  | 1 | 0 | 3.511317 | 3.154168  | 0.476387  |
| 6 | 0 | -5.822543 | -1.413958 | -0.537413 | 6 | 0 | 5.616786 | 2.665308  | 0.030152  |
| 6 | 0 | -4.670045 | -0.706156 | -1.036224 | 6 | 0 | 6.005394 | 1.413872  | -0.464191 |
| 6 | 0 | -6.343621 | -3.250655 | 0.891173  | 6 | 0 | 4.874804 | -0.707369 | -1.013559 |
| 1 | 0 | -8.064850 | -2.985945 | 2.173687  | 6 | 0 | 4.126721 | -2.865458 | -0.384221 |
| 6 | 0 | -5.454413 | -2.665265 | -0.026886 | 6 | 0 | 6.467336 | 3.251290  | 0.984071  |
| 6 | 0 | -3.524424 | -1.454555 | -0.889899 | 6 | 0 | 7.089459 | 0.720214  | 0.048833  |
| 1 | 0 | -6.121026 | -4.210569 | 1.348831  | 6 | 0 | 6.005394 | -1.413872 | -0.464191 |
| 6 | 0 | -3.948365 | -2.865958 | -0.378913 | 1 | 0 | 4.004024 | -3.651628 | -1.142876 |
| 1 | 0 | -3.795537 | -3.649380 | -1.134904 | 1 | 0 | 3.511317 | -3.154167 | 0.476388  |
| 1 | 0 | -3.369754 | -3.158956 | 0.505357  | 6 | 0 | 5.616787 | -2.665308 | 0.030152  |
| 1 | 0 | -1.021266 | -2.493984 | -0.845578 | 6 | 0 | 7.586485 | 2.532366  | 1.515993  |
| 6 | 0 | -1.033752 | -1.407256 | -0.841847 | 1 | 0 | 6.226171 | 4.211787  | 1.431064  |
| 6 | 0 | 0.193331  | -0.722163 | -0.778701 | 6 | 0 | 7.089459 | -0.720214 | 0.048833  |
| 6 | 0 | -2.267688 | -0.747574 | -0.912760 | 6 | 0 | 7.870286 | 1.219568  | 1.099006  |
| 6 | 0 | 0.193312  | 0.722161  | -0.778683 | 6 | 0 | 6.467336 | -3.251290 | 0.984071  |
| 6 | 0 | 1.440764  | -1.402585 | -0.715920 | 1 | 0 | 8.133750 | 2.986977  | 2.337183  |
| 6 | 0 | -2.267703 | 0.747508  | -0.912789 | 6 | 0 | 7.870286 | -1.219568 | 1.099006  |
| 6 | 0 | -1.033793 | 1.407218  | -0.841844 | 6 | 0 | 8.608026 | 0.000000  | 1.738139  |
| 6 | 0 | 1.440731  | 1.402596  | -0.715806 | 6 | 0 | 7.586485 | -2.532366 | 1.515994  |
| 6 | 0 | 2.656767  | -0.744901 | -0.656098 | 1 | 0 | 6.226171 | -4.211788 | 1.431063  |
| 1 | 0 | 1.424885  | -2.488889 | -0.725264 | 1 | 0 | 9.683100 | 0.000000  | 1.509718  |
| 1 | 0 | -1.021323 | 2.493945  | -0.845566 | 1 | 0 | 8.512291 | 0.000000  | 2.829890  |
| 6 | 0 | 2.656743  | 0.744921  | -0.656027 | 1 | 0 | 8.133750 | -2.986977 | 2.337183  |
| 1 | 0 | 1.424862  | 2.488899  | -0.725065 | 6 | 0 | 2.467746 | -0.749770 | -0.998409 |

**Sum-B2-Sum**

|   |   |           |           |           |
|---|---|-----------|-----------|-----------|
| 6 | 0 | -8.608028 | 0.000000  | 1.738136  |
| 6 | 0 | -4.126720 | 2.865458  | -0.384218 |
| 6 | 0 | -4.126720 | -2.865458 | -0.384219 |
| 1 | 0 | -9.683102 | 0.000000  | 1.509712  |
| 1 | 0 | -8.512295 | 0.000000  | 2.829887  |
| 1 | 0 | -4.004022 | 3.651629  | -1.142872 |
| 1 | 0 | -3.511317 | 3.154165  | 0.476391  |
| 1 | 0 | -4.004023 | -3.651629 | -1.142873 |
| 1 | 0 | -3.511316 | -3.154166 | 0.476390  |
| 6 | 0 | -7.089459 | 0.720214  | 0.048831  |
| 6 | 0 | -6.005393 | 1.413872  | -0.464190 |
| 6 | 0 | -6.005393 | -1.413872 | -0.464190 |
| 6 | 0 | -7.089459 | -0.720214 | 0.048831  |
| 6 | 0 | -4.874803 | -0.707369 | -1.013558 |
| 6 | 0 | -4.874803 | 0.707369  | -1.013558 |
| 6 | 0 | -7.870288 | 1.219568  | 1.099003  |
| 6 | 0 | -5.616786 | 2.665307  | 0.030154  |
| 6 | 0 | -5.616785 | -2.665307 | 0.030155  |
| 6 | 0 | -7.870288 | -1.219569 | 1.099004  |
| 6 | 0 | -3.725926 | -1.455470 | -0.916516 |
| 6 | 0 | -3.725927 | 1.455470  | -0.916516 |
| 6 | 0 | -7.586489 | 2.532367  | 1.515990  |
| 6 | 0 | -6.467336 | 3.251289  | 0.984074  |
| 6 | 0 | -6.467335 | -3.251288 | 0.984075  |
| 6 | 0 | -7.586488 | -2.532367 | 1.515991  |
| 1 | 0 | -8.133756 | 2.986977  | 2.337179  |
| 1 | 0 | -6.226170 | -4.211785 | 1.431068  |
| 1 | 0 | -8.133755 | -2.986977 | 2.337180  |
| 1 | 0 | -6.226171 | 4.211786  | 1.431067  |
| 6 | 0 | 3.725927  | 1.455470  | -0.916517 |
| 6 | 0 | 4.126721  | 2.865458  | -0.384221 |
| 6 | 0 | 4.874804  | 0.707369  | -1.013559 |
| 6 | 0 | 3.725927  | -1.455470 | -0.916517 |
| 1 | 0 | 4.004024  | 3.651628  | -1.142877 |

|   |   |           |           |           |
|---|---|-----------|-----------|-----------|
| 6 | 0 | 5.616786  | 2.665308  | 0.030152  |
| 6 | 0 | 6.005394  | 1.413872  | -0.464191 |
| 6 | 0 | 4.874804  | -0.707369 | -1.013559 |
| 6 | 0 | 4.126721  | -2.865458 | -0.384221 |
| 6 | 0 | 6.467336  | 3.251290  | 0.984071  |
| 6 | 0 | 7.089459  | 0.720214  | 0.048833  |
| 6 | 0 | 6.005394  | -1.413872 | -0.464191 |
| 1 | 0 | 4.004024  | -3.651628 | -1.142876 |
| 1 | 0 | 3.511317  | -3.154167 | 0.476388  |
| 6 | 0 | 5.616787  | -2.665308 | 0.030152  |
| 6 | 0 | 7.586485  | 2.532366  | 1.515993  |
| 1 | 0 | 6.226171  | 4.211787  | 1.431064  |
| 6 | 0 | 7.089459  | -0.720214 | 0.048833  |
| 6 | 0 | 7.870286  | 1.219568  | 1.099006  |
| 6 | 0 | 6.467336  | -3.251290 | 0.984071  |
| 1 | 0 | 8.133750  | 2.986977  | 2.337183  |
| 6 | 0 | 7.870286  | -1.219568 | 1.099006  |
| 6 | 0 | 8.608026  | 0.000000  | 1.738139  |
| 6 | 0 | 7.586485  | -2.532366 | 1.515994  |
| 1 | 0 | 6.226171  | -4.211788 | 1.431063  |
| 1 | 0 | 9.683100  | 0.000000  | 1.509718  |
| 1 | 0 | 8.512291  | 0.000000  | 2.829890  |
| 1 | 0 | 8.133750  | -2.986977 | 2.337183  |
| 6 | 0 | 2.467746  | -0.749770 | -0.998409 |
| 6 | 0 | 1.236894  | -1.408358 | -0.989165 |
| 6 | 0 | 2.467746  | 0.749770  | -0.998409 |
| 6 | 0 | 0.000000  | -0.725227 | -0.987758 |
| 1 | 0 | 1.224474  | -2.495178 | -0.994675 |
| 6 | 0 | 1.236894  | 1.408359  | -0.989165 |
| 6 | 0 | 0.000000  | 0.725227  | -0.987758 |
| 6 | 0 | -1.236894 | -1.408359 | -0.989165 |
| 1 | 0 | 1.224474  | 2.495178  | -0.994674 |
| 6 | 0 | -1.236894 | 1.408358  | -0.989165 |
| 6 | 0 | -2.467745 | -0.749770 | -0.998410 |
| 1 | 0 | -1.224474 | -2.495178 | -0.994674 |
| 6 | 0 | -2.467746 | 0.749770  | -0.998409 |
| 1 | 0 | -1.224474 | 2.495178  | -0.994674 |

**Cor-B3-Cor**

|   |   |           |           |           |
|---|---|-----------|-----------|-----------|
| 6 | 0 | -7.402023 | -1.149639 | -0.350152 |
| 6 | 0 | -6.095269 | -0.719710 | -0.677367 |
| 6 | 0 | -6.095278 | 0.719641  | -0.677432 |
| 6 | 0 | -7.402036 | 1.149583  | -0.350258 |
| 6 | 0 | -8.209380 | -0.000024 | -0.148612 |
| 6 | 0 | -7.683285 | -2.383205 | 0.226337  |
| 6 | 0 | -4.975217 | -1.489743 | -0.458015 |
| 6 | 0 | -4.975234 | 1.489710  | -0.458147 |
| 6 | 0 | -7.683311 | 2.383198  | 0.226122  |
| 6 | 0 | -9.349006 | 0.000004  | 0.640471  |
| 6 | 0 | -6.546720 | -3.270514 | 0.294737  |
| 6 | 0 | -5.254596 | -2.840564 | -0.027928 |
| 6 | 0 | -5.254630 | 2.840564  | -0.028188 |
| 6 | 0 | -6.546762 | 3.270528  | 0.294439  |
| 6 | 0 | -8.976447 | 2.450805  | 0.883731  |
| 6 | 0 | -9.767035 | 1.319906  | 1.080593  |
| 6 | 0 | -9.767022 | -1.319862 | 1.080707  |
| 6 | 0 | -8.976420 | -2.450770 | 0.883946  |
| 1 | 0 | -6.672007 | -4.274456 | 0.690989  |
| 1 | 0 | -4.434514 | -3.532478 | 0.138850  |
| 1 | 0 | -4.434562 | 3.532511  | 0.138523  |

|                   |   |            |           |           |   |   |            |           |           |
|-------------------|---|------------|-----------|-----------|---|---|------------|-----------|-----------|
| 1                 | 0 | -6.672061  | 4.274505  | 0.690596  | 6 | 0 | 5.176842   | -1.490345 | -0.465112 |
| 1                 | 0 | -9.306706  | 3.393575  | 1.311426  | 6 | 0 | 5.176879   | 1.490303  | -0.465239 |
| 1                 | 0 | -10.684250 | 1.423401  | 1.653912  | 6 | 0 | 9.111329   | 2.450944  | 1.061587  |
| 1                 | 0 | -10.684234 | -1.423318 | 1.654037  | 6 | 0 | 9.891597   | 1.319924  | 1.295533  |
| 1                 | 0 | -9.306668  | -3.393505 | 1.311729  | 6 | 0 | 9.891618   | -1.319922 | 1.295561  |
| 6                 | 0 | 4.975199   | 1.489760  | -0.457879 | 6 | 0 | 9.111302   | -2.450938 | 1.061750  |
| 6                 | 0 | 4.975191   | -1.489706 | -0.458041 | 6 | 0 | 6.712014   | -3.270806 | 0.360415  |
| 6                 | 0 | 6.095229   | 0.719707  | -0.677243 | 6 | 0 | 5.436240   | -2.840766 | -0.022096 |
| 6                 | 0 | 5.254602   | 2.840571  | -0.027792 | 6 | 0 | 5.436306   | 2.840787  | -0.022411 |
| 6                 | 0 | 6.095232   | -0.719640 | -0.677337 | 6 | 0 | 6.712084   | 3.270851  | 0.360091  |
| 6                 | 0 | 5.254614   | -2.840577 | -0.028150 | 1 | 0 | 9.421610   | 3.393817  | 1.503856  |
| 6                 | 0 | 7.402002   | 1.149632  | -0.350119 | 1 | 0 | 10.781261  | 1.423335  | 1.910782  |
| 6                 | 0 | 6.546755   | 3.270522  | 0.294779  | 1 | 0 | 10.781269  | -1.423301 | 1.910837  |
| 1                 | 0 | 4.434536   | 3.532495  | 0.139012  | 1 | 0 | 9.421557   | -3.393778 | 1.504106  |
| 6                 | 0 | 7.402004   | -1.149582 | -0.350209 | 1 | 0 | 6.818703   | -4.274651 | 0.762395  |
| 6                 | 0 | 6.546742   | -3.270533 | 0.294459  | 1 | 0 | 4.609157   | -3.532438 | 0.106959  |
| 1                 | 0 | 4.434550   | -3.532530 | 0.138569  | 1 | 0 | 4.609249   | 3.532510  | 0.106509  |
| 6                 | 0 | 8.209364   | 0.000017  | -0.148626 | 1 | 0 | 6.818790   | 4.274739  | 0.761953  |
| 6                 | 0 | 7.683312   | 2.383211  | 0.226314  | 1 | 0 | -9.277977  | 2.986783  | 2.247832  |
| 1                 | 0 | 6.672073   | 4.274471  | 0.691003  | 6 | 0 | -8.699846  | 2.532308  | 1.448045  |
| 6                 | 0 | 7.683308   | -2.383202 | 0.226135  | 6 | 0 | -7.561363  | 3.251431  | 0.959456  |
| 1                 | 0 | 6.672064   | -4.274521 | 0.690582  | 6 | 0 | -8.967486  | 1.219442  | 1.020420  |
| 6                 | 0 | 9.349050   | -0.000017 | 0.640374  | 6 | 0 | -6.675003  | 2.665539  | 0.038534  |
| 6                 | 0 | 8.976519   | 2.450778  | 0.883798  | 1 | 0 | -7.337556  | 4.211855  | 1.415447  |
| 6                 | 0 | 8.976465   | -2.450812 | 0.883689  | 6 | 0 | -9.729236  | -0.000012 | 1.630577  |
| 6                 | 0 | 9.767122   | 1.319866  | 1.080525  | 6 | 0 | -8.147148  | 0.720285  | 0.000817  |
| 6                 | 0 | 9.767079   | -1.319913 | 1.080493  | 6 | 0 | -5.170544  | 2.865840  | -0.318890 |
| 1                 | 0 | 9.306814   | 3.393515  | 1.311538  | 6 | 0 | -7.044538  | 1.414210  | -0.470356 |
| 1                 | 0 | 9.306758   | -3.393579 | 1.311363  | 6 | 0 | -8.967504  | -1.219441 | 1.020340  |
| 1                 | 0 | 10.684375  | 1.423332  | 1.653788  | 1 | 0 | -10.794592 | 0.000011  | 1.360473  |
| 1                 | 0 | 10.684328  | -1.423418 | 1.653755  | 1 | 0 | -9.676205  | -0.000048 | 2.725197  |
| 6                 | 0 | 3.693221   | 0.745961  | -0.496205 | 6 | 0 | -8.147161  | -0.720237 | 0.000766  |
| 6                 | 0 | 3.693219   | -0.745925 | -0.496275 | 6 | 0 | -4.749951  | 1.456172  | -0.836184 |
| 6                 | 0 | 2.477445   | 1.403833  | -0.491403 | 1 | 0 | -5.019251  | 3.652045  | -1.072339 |
| 6                 | 0 | 2.477450   | -1.403817 | -0.491482 | 1 | 0 | -4.588083  | 3.154674  | 0.564300  |
| 6                 | 0 | 1.226002   | 0.724417  | -0.491154 | 6 | 0 | -5.893572  | 0.707820  | -0.976164 |
| 1                 | 0 | 2.461527   | 2.490027  | -0.498831 | 6 | 0 | -8.699888  | -2.532340 | 1.447872  |
| 6                 | 0 | 1.226008   | -0.724407 | -0.491175 | 6 | 0 | -7.044562  | -1.414151 | -0.470447 |
| 1                 | 0 | 2.461538   | -2.490009 | -0.498971 | 6 | 0 | -5.893583  | -0.707740 | -0.976215 |
| 6                 | 0 | -0.000020  | 1.408873  | -0.493189 | 6 | 0 | -7.561413  | -3.251445 | 0.959241  |
| 6                 | 0 | -0.000014  | -1.408870 | -0.493196 | 1 | 0 | -9.278038  | -2.986865 | 2.247616  |
| 6                 | 0 | -1.226028  | 0.724411  | -0.491213 | 6 | 0 | -6.675040  | -2.665522 | 0.038351  |
| 1                 | 0 | -0.000017  | 2.495910  | -0.495637 | 6 | 0 | -4.749983  | -1.456118 | -0.836300 |
| 6                 | 0 | -1.226025  | -0.724414 | -0.491201 | 1 | 0 | -7.337638  | -4.211916 | 1.415153  |
| 1                 | 0 | -0.000002  | -2.495907 | -0.495651 | 6 | 0 | -5.170606  | -2.865847 | -0.319149 |
| 6                 | 0 | -2.477485  | 1.403817  | -0.491554 | 1 | 0 | -5.019368  | -3.651950 | -1.072718 |
| 6                 | 0 | -2.477473  | -1.403834 | -0.491497 | 1 | 0 | -4.588110  | -3.154809 | 0.563972  |
| 6                 | 0 | -3.693247  | 0.745934  | -0.496379 | 6 | 0 | -3.488648  | -0.750591 | -0.870893 |
| 1                 | 0 | -2.461561  | 2.490010  | -0.499043 | 6 | 0 | -2.261018  | -1.409489 | -0.815426 |
| 6                 | 0 | -3.693246  | -0.745969 | -0.496329 | 6 | 0 | -3.488631  | 0.750611  | -0.870833 |
| 1                 | 0 | -2.461529  | -2.490027 | -0.498939 | 6 | 0 | -1.022381  | -0.727358 | -0.767401 |
|                   |   |            |           |           | 1 | 0 | -2.248852  | -2.496181 | -0.819131 |
|                   |   |            |           |           | 6 | 0 | -2.260992  | 1.409513  | -0.815319 |
|                   |   |            |           |           | 6 | 0 | -1.022363  | 0.727364  | -0.767352 |
|                   |   |            |           |           | 6 | 0 | 0.210823   | -1.409746 | -0.719576 |
|                   |   |            |           |           | 1 | 0 | -2.248821  | 2.496203  | -0.818939 |
|                   |   |            |           |           | 6 | 0 | 0.210848   | 1.409733  | -0.719497 |
|                   |   |            |           |           | 6 | 0 | 1.430596   | -0.726140 | -0.666582 |
|                   |   |            |           |           | 1 | 0 | 0.211101   | -2.496867 | -0.722283 |
|                   |   |            |           |           | 6 | 0 | 1.430615   | 0.726111  | -0.666555 |
|                   |   |            |           |           | 1 | 0 | 0.211144   | 2.496854  | -0.722146 |
|                   |   |            |           |           | 6 | 0 | 2.684154   | -1.404796 | -0.612507 |
| <b>Sum-B3-Cor</b> |   |            |           |           |   |   |            |           |           |
| 6                 | 0 | 7.595635   | 1.149676  | -0.244038 |   |   |            |           |           |
| 6                 | 0 | 8.392596   | -0.000022 | -0.004517 |   |   |            |           |           |
| 6                 | 0 | 7.595627   | -1.149726 | -0.243976 |   |   |            |           |           |
| 6                 | 0 | 6.305752   | -0.720070 | -0.632169 |   |   |            |           |           |
| 6                 | 0 | 6.305758   | 0.720003  | -0.632221 |   |   |            |           |           |
| 6                 | 0 | 7.850187   | 2.383521  | 0.344661  |   |   |            |           |           |
| 6                 | 0 | 9.494113   | -0.000010 | 0.836857  |   |   |            |           |           |
| 6                 | 0 | 7.850152   | -2.383526 | 0.344835  |   |   |            |           |           |

|   |   |          |           |           |
|---|---|----------|-----------|-----------|
| 6 | 0 | 2.684191 | 1.404743  | -0.612502 |
| 1 | 0 | 2.668425 | -2.491068 | -0.620623 |
| 6 | 0 | 3.897065 | -0.747522 | -0.562741 |
| 6 | 0 | 3.897095 | 0.747502  | -0.562800 |
| 1 | 0 | 2.668471 | 2.491019  | -0.620650 |

**Sum-B3-Sum**

|   |   |           |           |           |
|---|---|-----------|-----------|-----------|
| 6 | 0 | 9.850587  | 0.000023  | 1.802880  |
| 6 | 0 | 5.361671  | -2.865503 | -0.301427 |
| 6 | 0 | 5.361631  | 2.865494  | -0.301497 |
| 1 | 0 | 10.924772 | 0.000040  | 1.570237  |
| 1 | 0 | 9.759322  | 0.000020  | 2.895007  |
| 1 | 0 | 5.235295  | -3.653220 | -1.057906 |
| 1 | 0 | 4.749208  | -3.152023 | 0.562042  |
| 1 | 0 | 5.235266  | 3.653237  | -1.057947 |
| 1 | 0 | 4.749184  | 3.152003  | 0.561991  |
| 6 | 0 | 8.325416  | -0.720387 | 0.119824  |
| 6 | 0 | 7.239486  | -1.414096 | -0.388795 |
| 6 | 0 | 7.239473  | 1.414098  | -0.388827 |
| 6 | 0 | 8.325405  | 0.720401  | 0.119819  |
| 6 | 0 | 6.106549  | 0.708429  | -0.935251 |
| 6 | 0 | 6.106550  | -0.708441 | -0.935237 |
| 6 | 0 | 9.110468  | -1.219516 | 1.166672  |
| 6 | 0 | 6.853126  | -2.665569 | 0.106957  |
| 6 | 0 | 6.853095  | 2.665556  | 0.106931  |
| 6 | 0 | 9.110438  | 1.219542  | 1.166672  |
| 6 | 0 | 4.959735  | 1.456623  | -0.835003 |
| 6 | 0 | 4.959750  | -1.456624 | -0.834964 |
| 6 | 0 | 8.828802  | -2.532704 | 1.584646  |
| 6 | 0 | 7.707857  | -3.251746 | 1.057261  |
| 6 | 0 | 7.707791  | 3.251752  | 1.057254  |
| 6 | 0 | 8.828747  | 2.532730  | 1.584640  |
| 1 | 0 | 9.379737  | -2.987393 | 2.403317  |
| 1 | 0 | 7.468780  | 4.212484  | 1.504866  |
| 1 | 0 | 9.379677  | 2.987436  | 2.403306  |
| 1 | 0 | 7.468850  | -4.212466 | 1.504904  |
| 6 | 0 | -4.959787 | -1.456623 | -0.835107 |
| 6 | 0 | -5.361707 | -2.865507 | -0.301570 |
| 6 | 0 | -6.106606 | -0.708423 | -0.935338 |
| 6 | 0 | -4.959790 | 1.456636  | -0.835101 |
| 1 | 0 | -5.235337 | -3.653247 | -1.058025 |
| 1 | 0 | -4.749211 | -3.151999 | 0.561889  |
| 6 | 0 | -6.853119 | -2.665546 | 0.106881  |
| 6 | 0 | -7.239513 | -1.414091 | -0.388849 |
| 6 | 0 | -6.106605 | 0.708428  | -0.935333 |
| 6 | 0 | -5.361699 | 2.865504  | -0.301546 |
| 6 | 0 | -7.707757 | -3.251755 | 1.057263  |
| 6 | 0 | -8.325415 | -0.720395 | 0.119868  |
| 6 | 0 | -7.239511 | 1.414093  | -0.388841 |
| 1 | 0 | -5.235318 | 3.653268  | -1.057973 |
| 1 | 0 | -4.749212 | 3.151972  | 0.561929  |
| 6 | 0 | -6.853118 | 2.665544  | 0.106899  |
| 6 | 0 | -8.828676 | -2.532740 | 1.584712  |
| 1 | 0 | -7.468682 | -4.212479 | 1.504855  |
| 6 | 0 | -8.325414 | 0.720394  | 0.119872  |
| 6 | 0 | -9.110371 | -1.219540 | 1.166774  |
| 6 | 0 | -7.707760 | 3.251753  | 1.057277  |
| 1 | 0 | -9.379551 | -2.987418 | 2.403430  |
| 6 | 0 | -9.110371 | 1.219534  | 1.166778  |
| 6 | 0 | -9.850409 | -0.000003 | 1.803090  |
| 6 | 0 | -8.828680 | 2.532736  | 1.584719  |

|   |   |            |           |           |
|---|---|------------|-----------|-----------|
| 1 | 0 | -7.468688  | 4.212478  | 1.504868  |
| 1 | 0 | -10.924630 | -0.000002 | 1.570627  |
| 1 | 0 | -9.758962  | -0.000006 | 2.895205  |
| 1 | 0 | -9.379561  | 2.987410  | 2.403435  |
| 6 | 0 | -3.698616  | -0.751833 | -0.916367 |
| 6 | 0 | -3.698615  | 0.751839  | -0.916360 |
| 6 | 0 | -2.472236  | -1.410329 | -0.908270 |
| 6 | 0 | -2.472231  | 1.410334  | -0.908261 |
| 6 | 0 | -1.228951  | -0.728701 | -0.908739 |
| 1 | 0 | -2.460079  | -2.497092 | -0.912804 |
| 6 | 0 | -1.228951  | 0.728699  | -0.908733 |
| 1 | 0 | -2.460068  | 2.497096  | -0.912788 |
| 6 | 0 | -0.000030  | -1.410371 | -0.910901 |
| 6 | 0 | -0.000025  | 1.410363  | -0.910892 |
| 6 | 0 | 1.228893   | -0.728713 | -0.908726 |
| 1 | 0 | -0.000041  | -2.497556 | -0.914373 |
| 6 | 0 | 1.228898   | 0.728698  | -0.908725 |
| 1 | 0 | -0.000027  | 2.497548  | -0.914358 |
| 6 | 0 | 2.472177   | -1.410348 | -0.908234 |
| 6 | 0 | 2.472182   | 1.410333  | -0.908243 |
| 6 | 0 | 3.698551   | -0.751846 | -0.916280 |
| 1 | 0 | 2.460023   | -2.497109 | -0.912823 |
| 6 | 0 | 3.698554   | 0.751806  | -0.916287 |
| 1 | 0 | 2.460033   | 2.497089  | -0.912812 |

**Cor-B4-Cor**

|   |   |           |           |           |
|---|---|-----------|-----------|-----------|
| 6 | 0 | 8.634058  | 1.149692  | -0.314816 |
| 6 | 0 | 7.326667  | 0.720142  | -0.638365 |
| 6 | 0 | 7.326670  | -0.720150 | -0.638358 |
| 6 | 0 | 8.634062  | -1.149693 | -0.314804 |
| 6 | 0 | 9.441865  | 0.000002  | -0.115448 |
| 6 | 0 | 8.917783  | 2.383764  | 0.259893  |
| 6 | 0 | 6.207736  | 1.490861  | -0.416933 |
| 6 | 0 | 6.207739  | -1.490868 | -0.416917 |
| 6 | 0 | 8.917791  | -2.383759 | 0.259916  |
| 6 | 0 | 10.584311 | 0.000007  | 0.669430  |
| 6 | 0 | 7.781938  | 3.271246  | 0.331258  |
| 6 | 0 | 6.488628  | 2.841376  | 0.012246  |
| 6 | 0 | 6.488637  | -2.841381 | 0.012272  |
| 6 | 0 | 7.781948  | -3.271244 | 0.331286  |
| 6 | 0 | 10.213171 | -2.451083 | 0.913083  |
| 6 | 0 | 11.004132 | -1.320033 | 1.107614  |
| 6 | 0 | 11.004128 | 1.320054  | 1.107600  |
| 6 | 0 | 10.213164 | 2.451099  | 0.913058  |
| 1 | 0 | 7.908443  | 4.275265  | 0.726930  |
| 1 | 0 | 5.669122  | 3.533410  | 0.181340  |
| 1 | 0 | 5.669135  | -3.533418 | 0.181367  |
| 1 | 0 | 7.908459  | -4.275261 | 0.726962  |
| 1 | 0 | 10.545270 | -3.393914 | 1.339227  |
| 1 | 0 | 11.923440 | -1.423548 | 1.677566  |
| 1 | 0 | 11.923438 | 1.423577  | 1.677548  |
| 1 | 0 | 10.545260 | 3.393937  | 1.339191  |
| 6 | 0 | -6.207706 | -1.490862 | -0.416769 |
| 6 | 0 | -6.207717 | 1.490917  | -0.416864 |
| 6 | 0 | -7.326614 | -0.720114 | -0.638132 |
| 6 | 0 | -6.488649 | -2.841437 | 0.012218  |
| 6 | 0 | -7.326606 | 0.720152  | -0.638157 |
| 6 | 0 | -6.488673 | 2.841520  | 0.011928  |
| 6 | 0 | -8.634020 | -1.149655 | -0.314681 |
| 6 | 0 | -7.781991 | -3.271318 | 0.331084  |
| 1 | 0 | -5.669183 | -3.533550 | 0.181186  |

|   |   |            |           |           |   |   |            |           |           |
|---|---|------------|-----------|-----------|---|---|------------|-----------|-----------|
| 6 | 0 | -8.634001  | 1.149701  | -0.314610 | 6 | 0 | -6.681972  | -2.841405 | 0.038843  |
| 6 | 0 | -7.781927  | 3.271306  | 0.331209  | 6 | 0 | -7.960907  | -3.271362 | 0.411285  |
| 1 | 0 | -5.669165  | 3.533577  | 0.180907  | 1 | 0 | -10.679711 | -3.394069 | 1.532967  |
| 6 | 0 | -9.441799  | 0.000030  | -0.115294 | 1 | 0 | -12.042305 | -1.423493 | 1.929010  |
| 6 | 0 | -8.917824  | -2.383793 | 0.259825  | 1 | 0 | -12.042347 | 1.423448  | 1.929001  |
| 1 | 0 | -7.908544  | -4.275396 | 0.726592  | 1 | 0 | -10.679756 | 3.394043  | 1.533035  |
| 6 | 0 | -8.917770  | 2.383787  | 0.259997  | 1 | 0 | -8.070831  | 4.275265  | 0.812385  |
| 1 | 0 | -7.908415  | 4.275363  | 0.726794  | 1 | 0 | -5.856037  | 3.533228  | 0.174470  |
| 6 | 0 | -10.584355 | 0.000008  | 0.669424  | 1 | 0 | -5.856026  | -3.533190 | 0.174347  |
| 6 | 0 | -10.213289 | -2.451147 | 0.912807  | 1 | 0 | -8.070833  | -4.275272 | 0.812211  |
| 6 | 0 | -10.213182 | 2.451118  | 0.913075  | 1 | 0 | 10.489707  | -2.987201 | 2.315943  |
| 6 | 0 | -11.004249 | -1.320087 | 1.107375  | 6 | 0 | 9.914355   | -2.532635 | 1.514208  |
| 6 | 0 | -11.004178 | 1.320059  | 1.107568  | 6 | 0 | 8.778123   | -3.251767 | 1.021031  |
| 1 | 0 | -10.545486 | -3.394007 | 1.338813  | 6 | 0 | 10.183291  | -1.219406 | 1.087855  |
| 1 | 0 | -10.545345 | 3.393954  | 1.339166  | 6 | 0 | 7.895203   | -2.665653 | 0.096720  |
| 1 | 0 | -11.923631 | -1.423664 | 1.677197  | 1 | 0 | 8.552762   | -4.212482 | 1.475637  |
| 1 | 0 | -11.923527 | 1.423645  | 1.677437  | 6 | 0 | 10.942365  | 0.000035  | 1.701309  |
| 6 | 0 | -2.455615  | -0.726671 | -0.450109 | 6 | 0 | 9.367137   | -0.720411 | 0.065081  |
| 6 | 0 | -2.455617  | 0.726617  | -0.450163 | 6 | 0 | 6.392359   | -2.865805 | -0.266745 |
| 6 | 0 | -1.236847  | -1.410786 | -0.452341 | 6 | 0 | 8.266521   | -1.414308 | -0.410551 |
| 6 | 0 | -1.236871  | 1.410736  | -0.452414 | 6 | 0 | 10.183301  | 1.219445  | 1.087779  |
| 6 | 0 | 0.000001   | -0.729425 | -0.452285 | 1 | 0 | 12.008929  | 0.000022  | 1.436012  |
| 1 | 0 | -1.237616  | -2.497787 | -0.453740 | 1 | 0 | 10.884437  | 0.000069  | 2.795694  |
| 6 | 0 | 0.000006   | 0.729378  | -0.452315 | 6 | 0 | 9.367141   | 0.720393  | 0.065038  |
| 1 | 0 | -1.237532  | 2.497740  | -0.453869 | 6 | 0 | 5.974595   | -1.457068 | -0.788201 |
| 6 | 0 | 1.236902   | -1.410791 | -0.452385 | 1 | 0 | 6.243440   | -3.653487 | -1.019136 |
| 6 | 0 | 1.236888   | 1.410761  | -0.452438 | 1 | 0 | 5.806024   | -3.152425 | 0.614651  |
| 6 | 0 | 2.455637   | -0.726705 | -0.450215 | 6 | 0 | 7.117497   | -0.708685 | -0.922487 |
| 1 | 0 | 1.237526   | -2.497801 | -0.453803 | 6 | 0 | 9.914378   | 2.532705  | 1.514046  |
| 6 | 0 | 2.455633   | 0.726681  | -0.450238 | 6 | 0 | 8.266531   | 1.414268  | -0.410637 |
| 1 | 0 | 1.237509   | 2.497768  | -0.453895 | 6 | 0 | 7.117501   | 0.708621  | -0.922533 |
| 6 | 0 | 3.711384   | -1.405367 | -0.450142 | 6 | 0 | 8.778150   | 3.251813  | 1.020826  |
| 6 | 0 | 3.711380   | 1.405351  | -0.450171 | 1 | 0 | 10.489735  | 2.987318  | 2.315751  |
| 6 | 0 | 4.924490   | -0.748203 | -0.454450 | 6 | 0 | 7.895222   | 2.665645  | 0.096558  |
| 1 | 0 | 3.695251   | -2.491588 | -0.457651 | 6 | 0 | 5.974602   | 1.457019  | -0.788288 |
| 6 | 0 | 4.924486   | 0.748190  | -0.454462 | 1 | 0 | 8.552795   | 4.212557  | 1.475375  |
| 1 | 0 | 3.695243   | 2.491570  | -0.457702 | 6 | 0 | 6.392377   | 2.865782  | -0.266907 |
| 6 | 0 | -3.711352  | -1.405315 | -0.449973 | 1 | 0 | 6.243456   | 3.653423  | -1.019340 |
| 6 | 0 | -3.711350  | 1.405325  | -0.450085 | 1 | 0 | 5.806048   | 3.152451  | 0.614477  |
| 6 | 0 | -4.924451  | -0.748171 | -0.454264 | 6 | 0 | 4.711121   | 0.752322  | -0.831690 |
| 1 | 0 | -3.695232  | -2.491531 | -0.457478 | 6 | 0 | 3.486462   | 1.410785  | -0.786823 |
| 6 | 0 | -4.924459  | 0.748200  | -0.454306 | 6 | 0 | 4.711116   | -0.752366 | -0.831652 |
| 1 | 0 | -3.695162  | 2.491525  | -0.457644 | 6 | 0 | 2.242628   | 0.729178  | -0.748822 |

**Sum-B4-Cor**

|   |   |            |           |           |   |   |           |           |           |
|---|---|------------|-----------|-----------|---|---|-----------|-----------|-----------|
| 6 | 0 | -8.838780  | -1.149743 | -0.199038 | 6 | 0 | 3.474111  | 2.497478  | -0.790901 |
| 6 | 0 | -9.637514  | 0.000008  | 0.034219  | 6 | 0 | 3.486454  | -1.410821 | -0.786767 |
| 6 | 0 | -8.838777  | 1.149776  | -0.198985 | 6 | 0 | 2.242622  | -0.729205 | -0.748810 |
| 6 | 0 | -7.546068  | 0.720363  | -0.576930 | 6 | 0 | 1.016501  | 1.411347  | -0.711569 |
| 6 | 0 | -7.546070  | -0.720321 | -0.576993 | 1 | 0 | 3.474098  | -2.497514 | -0.790797 |
| 6 | 0 | -9.098519  | -2.383904 | 0.387046  | 6 | 0 | 1.016491  | -1.411367 | -0.711581 |
| 6 | 0 | -10.746074 | -0.000012 | 0.866214  | 6 | 0 | -0.214508 | 0.730676  | -0.670370 |
| 6 | 0 | -9.098513  | 2.383917  | 0.387141  | 1 | 0 | 1.016917  | 2.498421  | -0.713407 |
| 6 | 0 | -6.418912  | 1.491142  | -0.401804 | 6 | 0 | -0.214516 | -0.730684 | -0.670400 |
| 6 | 0 | -6.418912  | -1.491098 | -0.401891 | 1 | 0 | 1.016897  | -2.498440 | -0.713409 |
| 6 | 0 | -10.365531 | -2.451159 | 1.093548  | 6 | 0 | -1.454423 | 1.411461  | -0.627510 |
| 6 | 0 | -11.147512 | -1.320044 | 1.321258  | 6 | 0 | -1.454436 | -1.411469 | -0.627639 |
| 6 | 0 | -11.147546 | 1.320028  | 1.321256  | 1 | 0 | -1.455139 | 2.498528  | -0.628818 |
| 6 | 0 | -10.365576 | 2.451145  | 1.093591  | 6 | 0 | -2.669784 | 0.727687  | -0.581611 |
| 6 | 0 | -7.960913  | 3.271361  | 0.411442  | 6 | 0 | -2.669793 | -0.727691 | -0.581704 |
| 6 | 0 | -6.681963  | 2.841420  | 0.038979  | 1 | 0 | -1.455129 | -2.498537 | -0.629021 |
|   |   |            |           |           | 1 | 0 | -3.910449 | -2.492106 | -0.542601 |
|   |   |            |           |           | 6 | 0 | -3.926330 | -1.405830 | -0.534486 |
|   |   |            |           |           | 6 | 0 | -5.137807 | -0.749003 | -0.491423 |



|   |   |           |          |           |
|---|---|-----------|----------|-----------|
| 6 | 0 | -5.137807 | 0.749028 | -0.491345 |
| 6 | 0 | -3.926314 | 1.405830 | -0.534296 |
| 1 | 0 | -3.910390 | 2.492111 | -0.542242 |

**Sum-B4-Sum**

|   |   |            |           |           |
|---|---|------------|-----------|-----------|
| 6 | 0 | 11.086823  | 0.000082  | 1.863948  |
| 6 | 0 | 6.595256   | -2.865569 | -0.233247 |
| 6 | 0 | 6.595124   | 2.865575  | -0.233260 |
| 1 | 0 | 12.160733  | 0.000124  | 1.630056  |
| 1 | 0 | 10.996858  | 0.000055  | 2.956186  |
| 1 | 0 | 6.467174   | -3.654095 | -0.988586 |
| 1 | 0 | 5.984112   | -3.150843 | 0.631600  |
| 1 | 0 | 6.467051   | 3.654062  | -0.988647 |
| 1 | 0 | 5.983922   | 3.150870  | 0.631534  |
| 6 | 0 | 9.559257   | -0.720407 | 0.183148  |
| 6 | 0 | 8.472594   | -1.414154 | -0.323718 |
| 6 | 0 | 8.472521   | 1.414246  | -0.323689 |
| 6 | 0 | 9.559218   | 0.720546  | 0.183173  |
| 6 | 0 | 7.338607   | 0.709016  | -0.868985 |
| 6 | 0 | 7.338637   | -0.708982 | -0.868992 |
| 6 | 0 | 10.346020  | -1.219451 | 1.228587  |
| 6 | 0 | 8.087293   | -2.665679 | 0.172527  |
| 6 | 0 | 8.087135   | 2.665732  | 0.172593  |
| 6 | 0 | 10.345934  | 1.219595  | 1.228644  |
| 6 | 0 | 6.192788   | 1.457237  | -0.767482 |
| 6 | 0 | 6.192858   | -1.457270 | -0.767487 |
| 6 | 0 | 10.065457  | -2.532962 | 1.646735  |
| 6 | 0 | 8.943856   | -3.252051 | 1.121202  |
| 6 | 0 | 8.943629   | 3.252100  | 1.121334  |
| 6 | 0 | 10.065265  | 2.533060  | 1.646862  |
| 1 | 0 | 10.618018  | -2.987706 | 2.464270  |
| 1 | 0 | 8.705536   | 4.212997  | 1.569064  |
| 1 | 0 | 10.617787  | 2.987807  | 2.464422  |
| 1 | 0 | 8.705822   | -4.212973 | 1.568910  |
| 6 | 0 | -6.192857  | -1.457297 | -0.767512 |
| 6 | 0 | -6.595204  | -2.865554 | -0.233092 |
| 6 | 0 | -7.338647  | -0.709030 | -0.869072 |
| 6 | 0 | -6.192837  | 1.457231  | -0.767606 |
| 1 | 0 | -6.467118  | -3.654190 | -0.988327 |
| 1 | 0 | -5.984006  | -3.150696 | 0.631755  |
| 6 | 0 | -8.087201  | -2.665631 | 0.172723  |
| 6 | 0 | -8.472576  | -1.414204 | -0.323690 |
| 6 | 0 | -7.338638  | 0.708975  | -0.869117 |
| 6 | 0 | -6.595164  | 2.865528  | -0.233276 |
| 6 | 0 | -8.943660  | -3.251920 | 1.121559  |
| 6 | 0 | -9.559282  | -0.720457 | 0.183116  |
| 6 | 0 | -8.472557  | 1.414201  | -0.323780 |
| 1 | 0 | -6.467065  | 3.654113  | -0.988562 |
| 1 | 0 | -5.983959  | 3.150716  | 0.631551  |
| 6 | 0 | -8.087163  | 2.665652  | 0.172553  |
| 6 | 0 | -10.065320 | -2.532861 | 1.646972  |
| 1 | 0 | -8.705543  | -4.212782 | 1.569346  |
| 6 | 0 | -9.559272  | 0.720501  | 0.183070  |
| 6 | 0 | -10.346012 | -1.219443 | 1.228596  |
| 6 | 0 | -8.943613  | 3.252013  | 1.121353  |
| 1 | 0 | -10.617890 | -2.987529 | 2.464544  |
| 6 | 0 | -10.345994 | 1.219563  | 1.228519  |
| 6 | 0 | -11.087007 | 0.000086  | 1.863730  |
| 6 | 0 | -10.065283 | 2.533003  | 1.646813  |
| 1 | 0 | -8.705482  | 4.212900  | 1.569079  |
| 1 | 0 | -12.160885 | 0.000086  | 1.629708  |

|   |   |            |           |           |
|---|---|------------|-----------|-----------|
| 1 | 0 | -10.997160 | 0.000120  | 2.955982  |
| 1 | 0 | -10.617847 | 2.987732  | 2.464355  |
| 6 | 0 | -4.930158  | -0.753075 | -0.848967 |
| 6 | 0 | -4.930147  | 0.752984  | -0.849016 |
| 6 | 0 | -3.705972  | -1.411313 | -0.842047 |
| 6 | 0 | -3.705954  | 1.411205  | -0.842134 |
| 6 | 0 | -2.459552  | -0.730088 | -0.843332 |
| 1 | 0 | -3.693693  | -2.498057 | -0.846604 |
| 6 | 0 | -2.459539  | 0.729960  | -0.843375 |
| 1 | 0 | -3.693661  | 2.497949  | -0.846759 |
| 6 | 0 | -1.235549  | -1.411999 | -0.845963 |
| 6 | 0 | -1.235536  | 1.411859  | -0.846044 |
| 6 | 0 | -0.000006  | -0.731833 | -0.845876 |
| 1 | 0 | -1.236012  | -2.499119 | -0.848020 |
| 6 | 0 | 0.000002   | 0.731671  | -0.845915 |
| 1 | 0 | -1.235993  | 2.498979  | -0.848165 |
| 6 | 0 | 1.235546   | -1.411987 | -0.845972 |
| 6 | 0 | 1.235530   | 1.411828  | -0.846037 |
| 6 | 0 | 2.459565   | -0.730062 | -0.843357 |
| 1 | 0 | 1.236038   | -2.499109 | -0.848059 |
| 6 | 0 | 2.459534   | 0.729956  | -0.843381 |
| 1 | 0 | 1.235998   | 2.498961  | -0.848171 |
| 6 | 0 | 3.705946   | 1.411179  | -0.842157 |
| 6 | 0 | 4.930146   | 0.752994  | -0.848938 |
| 1 | 0 | 3.693653   | 2.497920  | -0.846893 |
| 6 | 0 | 4.930179   | -0.753073 | -0.848923 |
| 6 | 0 | 3.705973   | -1.411274 | -0.842120 |
| 1 | 0 | 3.693666   | -2.498012 | -0.846739 |

**Cor-B5-Cor**

|   |   |           |           |           |
|---|---|-----------|-----------|-----------|
| 6 | 0 | 9.866054  | 1.149801  | -0.283451 |
| 6 | 0 | 8.558430  | 0.720474  | -0.605440 |
| 6 | 0 | 8.558444  | -0.720308 | -0.605572 |
| 6 | 0 | 9.866078  | -1.149669 | -0.283670 |
| 6 | 0 | 10.674050 | 0.000056  | -0.085165 |
| 6 | 0 | 10.150954 | 2.384108  | 0.290447  |
| 6 | 0 | 7.440004  | 1.491527  | -0.383192 |
| 6 | 0 | 7.440035  | -1.491427 | -0.383466 |
| 6 | 0 | 10.151007 | -2.384081 | 0.289987  |
| 6 | 0 | 11.817827 | -0.000008 | 0.697705  |
| 6 | 0 | 9.015464  | 3.271682  | 0.363092  |
| 6 | 0 | 7.721620  | 2.841885  | 0.045631  |
| 6 | 0 | 7.721681  | -2.841859 | 0.045100  |
| 6 | 0 | 9.015535  | -3.271692 | 0.362471  |
| 6 | 0 | 11.447428 | -2.451316 | 0.941067  |
| 6 | 0 | 12.238519 | -1.320192 | 1.134726  |
| 6 | 0 | 12.238486 | 1.320101  | 1.134987  |
| 6 | 0 | 11.447368 | 2.451244  | 0.941549  |
| 1 | 0 | 9.142500  | 4.275733  | 0.758518  |
| 1 | 0 | 6.902391  | 3.534004  | 0.215724  |
| 1 | 0 | 6.902467  | -3.534028 | 0.215064  |
| 1 | 0 | 9.142595  | -4.275816 | 0.757703  |
| 1 | 0 | 11.780448 | -3.394236 | 1.366302  |
| 1 | 0 | 13.158812 | -1.423806 | 1.703068  |
| 1 | 0 | 13.158778 | 1.423625  | 1.703349  |
| 1 | 0 | 11.780367 | 3.394090  | 1.366966  |
| 6 | 0 | -7.440008 | -1.491524 | -0.383223 |
| 6 | 0 | -7.440023 | 1.491396  | -0.383525 |
| 6 | 0 | -8.558440 | -0.720470 | -0.605459 |
| 6 | 0 | -7.721614 | -2.841888 | 0.045605  |
| 6 | 0 | -8.558447 | 0.720298  | -0.605601 |

|                   |   |            |           |           |   |   |            |           |           |
|-------------------|---|------------|-----------|-----------|---|---|------------|-----------|-----------|
| 6                 | 0 | -7.721668  | 2.841875  | 0.044953  | 6 | 0 | -11.994553 | 0.000103  | 0.893221  |
| 6                 | 0 | -9.866060  | -1.149796 | -0.283419 | 6 | 0 | -10.344305 | 2.384225  | 0.423366  |
| 6                 | 0 | -9.015428  | -3.271662 | 0.363168  | 6 | 0 | -7.660217  | 1.491585  | -0.350187 |
| 1                 | 0 | -6.902358  | -3.533980 | 0.215690  | 6 | 0 | -7.660275  | -1.491661 | -0.350145 |
| 6                 | 0 | -9.866077  | 1.149679  | -0.283669 | 6 | 0 | -11.615634 | -2.451206 | 1.122498  |
| 6                 | 0 | -9.015499  | 3.271717  | 0.362380  | 6 | 0 | -12.398839 | -1.319998 | 1.345618  |
| 1                 | 0 | -6.902455  | 3.534066  | 0.214836  | 6 | 0 | -12.398835 | 1.320292  | 1.345423  |
| 6                 | 0 | -10.674032 | -0.000045 | -0.085132 | 6 | 0 | -11.615595 | 2.451438  | 1.122183  |
| 6                 | 0 | -10.150938 | -2.384087 | 0.290507  | 6 | 0 | -9.207071  | 3.271794  | 0.453772  |
| 1                 | 0 | -9.142472  | -4.275706 | 0.758612  | 6 | 0 | -7.925885  | 2.841844  | 0.088760  |
| 6                 | 0 | -10.150991 | 2.384101  | 0.289961  | 6 | 0 | -7.926013  | -2.841892 | 0.088875  |
| 1                 | 0 | -9.142554  | 4.275871  | 0.757538  | 6 | 0 | -9.207195  | -3.271742 | 0.454034  |
| 6                 | 0 | -11.817799 | 0.000033  | 0.697759  | 1 | 0 | -11.932702 | -3.394115 | 1.559832  |
| 6                 | 0 | -11.447327 | -2.451219 | 0.941639  | 1 | 0 | -13.297342 | -1.423495 | 1.947862  |
| 6                 | 0 | -11.447392 | 2.451353  | 0.941061  | 1 | 0 | -13.297335 | 1.423887  | 1.947652  |
| 6                 | 0 | -12.238446 | -1.320063 | 1.135072  | 1 | 0 | -11.932606 | 3.394416  | 1.559413  |
| 6                 | 0 | -12.238481 | 1.320230  | 1.134761  | 1 | 0 | -9.319352  | 4.275823  | 0.853735  |
| 1                 | 0 | -11.780300 | -3.394050 | 1.367106  | 1 | 0 | -7.100809  | 3.533781  | 0.228688  |
| 1                 | 0 | -11.780390 | 3.394280  | 1.366302  | 1 | 0 | -7.100993  | -3.533882 | 0.228891  |
| 1                 | 0 | -13.158712 | -1.423581 | 1.703474  | 1 | 0 | -9.319495  | -4.275727 | 0.854107  |
| 1                 | 0 | -13.158760 | 1.423854  | 1.703124  | 1 | 0 | 11.703011  | -2.987454 | 2.376924  |
| 6                 | 0 | -1.229462  | -0.731122 | -0.420510 | 6 | 0 | 11.130291  | -2.532819 | 1.573348  |
| 6                 | 0 | -1.229474  | 0.731079  | -0.420435 | 6 | 0 | 9.995973   | -3.251947 | 1.076087  |
| 6                 | 0 | 0.000003   | -1.412365 | -0.420847 | 6 | 0 | 11.400520  | -1.219384 | 1.148087  |
| 6                 | 0 | -0.000016  | 1.412318  | -0.420675 | 6 | 0 | 9.116216   | -2.665687 | 0.148745  |
| 6                 | 0 | 1.229414   | -0.731114 | -0.420534 | 1 | 0 | 9.769134   | -4.212820 | 1.529623  |
| 1                 | 0 | 0.000004   | -2.499324 | -0.421234 | 6 | 0 | 12.157279  | 0.000034  | 1.764408  |
| 6                 | 0 | 1.229396   | 0.731089  | -0.420433 | 6 | 0 | 10.588065  | -0.720443 | 0.122486  |
| 1                 | 0 | -0.000045  | 2.499282  | -0.420921 | 6 | 0 | 7.614765   | -2.865752 | -0.220063 |
| 6                 | 0 | 2.471298   | -1.411880 | -0.420205 | 6 | 0 | 9.489193   | -1.414308 | -0.357100 |
| 6                 | 0 | 2.471272   | 1.411884  | -0.419997 | 6 | 0 | 11.400515  | 1.219452  | 1.148093  |
| 6                 | 0 | 3.686452   | -0.728029 | -0.417522 | 1 | 0 | 13.224856  | 0.000038  | 1.503207  |
| 1                 | 0 | 2.471887   | -2.498885 | -0.421689 | 1 | 0 | 12.095170  | 0.000030  | 2.858569  |
| 6                 | 0 | 3.686435   | 0.728054  | -0.417408 | 6 | 0 | 10.588056  | 0.720513  | 0.122496  |
| 1                 | 0 | 2.471843   | 2.498889  | -0.421319 | 6 | 0 | 7.199260   | -1.457520 | -0.744352 |
| 6                 | 0 | 4.944396   | -1.406198 | -0.417078 | 1 | 0 | 7.468195   | -3.654211 | -0.972108 |
| 6                 | 0 | 4.944368   | 1.406252  | -0.416844 | 1 | 0 | 7.025110   | -3.151207 | 0.659519  |
| 6                 | 0 | 6.156169   | -0.749382 | -0.420828 | 6 | 0 | 8.341971   | -0.709101 | -0.873929 |
| 1                 | 0 | 4.928203   | -2.492434 | -0.424723 | 6 | 0 | 11.130285  | 2.532885  | 1.573359  |
| 6                 | 0 | 6.156154   | 0.749461  | -0.420698 | 6 | 0 | 9.489170   | 1.414370  | -0.357070 |
| 1                 | 0 | 4.928152   | 2.492488  | -0.424311 | 6 | 0 | 8.341956   | 0.709156  | -0.873907 |
| 6                 | 0 | -2.471292  | -1.411918 | -0.420120 | 6 | 0 | 9.995953   | 3.252005  | 1.076118  |
| 6                 | 0 | -2.471313  | 1.411852  | -0.420053 | 1 | 0 | 11.703005  | 2.987515  | 2.376939  |
| 6                 | 0 | -3.686473  | -0.728069 | -0.417481 | 6 | 0 | 9.116182   | 2.665736  | 0.148796  |
| 1                 | 0 | -2.471886  | -2.498918 | -0.421568 | 6 | 0 | 7.199231   | 1.457548  | -0.744303 |
| 6                 | 0 | -3.686486  | 0.727987  | -0.417475 | 1 | 0 | 9.769102   | 4.212864  | 1.529675  |
| 1                 | 0 | -2.471932  | 2.498856  | -0.421462 | 6 | 0 | 7.614709   | 2.865766  | -0.219949 |
| 6                 | 0 | -4.944396  | -1.406263 | -0.416961 | 1 | 0 | 7.468091   | 3.654258  | -0.971949 |
| 6                 | 0 | -4.944408  | 1.406165  | -0.417043 | 1 | 0 | 7.025070   | 3.151157  | 0.659665  |
| 6                 | 0 | -6.156182  | -0.749432 | -0.420776 | 6 | 0 | 5.934729   | 0.753338  | -0.794434 |
| 1                 | 0 | -4.928201  | -2.492495 | -0.424462 | 6 | 0 | 4.711583   | 1.411567  | -0.757078 |
| 6                 | 0 | -6.156197  | 0.749352  | -0.420896 | 6 | 0 | 5.934743   | -0.753332 | -0.794464 |
| 1                 | 0 | -4.928212  | 2.492399  | -0.424651 | 6 | 0 | 3.464980   | 0.730317  | -0.726522 |
| <b>Sum-B5-Cor</b> |   |            |           |           | 1 | 0 | 4.699165   | 2.498262  | -0.761315 |
| 6                 | 0 | -10.080912 | -1.149745 | -0.160502 | 6 | 0 | 4.711610   | -1.411584 | -0.757138 |
| 6                 | 0 | -10.880870 | 0.000048  | 0.068134  | 6 | 0 | 3.464991   | -0.730357 | -0.726552 |
| 6                 | 0 | -10.080857 | 1.149780  | -0.160592 | 6 | 0 | 2.242405   | 1.412250  | -0.697103 |
| 6                 | 0 | -8.786122  | 0.720461  | -0.531080 | 1 | 0 | 4.699209   | -2.498279 | -0.761416 |
| 6                 | 0 | -8.786179  | -0.720539 | -0.531069 | 6 | 0 | 2.242430   | -1.412310 | -0.697166 |
| 6                 | 0 | -10.344397 | -2.384131 | 0.423605  | 6 | 0 | 1.006059   | 0.732109  | -0.663785 |
|                   |   |            |           |           | 1 | 0 | 2.242722   | 2.499313  | -0.698938 |
|                   |   |            |           |           | 6 | 0 | 1.006059   | -0.732179 | -0.663818 |

|   |   |           |           |           |
|---|---|-----------|-----------|-----------|
| 1 | 0 | 2.242753  | -2.499372 | -0.699043 |
| 6 | 0 | -0.226707 | 1.412820  | -0.629301 |
| 6 | 0 | -0.226684 | -1.412936 | -0.629344 |
| 1 | 0 | -0.226832 | 2.499827  | -0.629593 |
| 6 | 0 | -1.452955 | 0.731820  | -0.593063 |
| 6 | 0 | -1.452953 | -0.731953 | -0.593063 |
| 1 | 0 | -0.226729 | -2.499939 | -0.629711 |
| 6 | 0 | -2.696242 | -1.412333 | -0.554798 |
| 6 | 0 | -3.909459 | -0.728688 | -0.513782 |
| 1 | 0 | -2.696920 | -2.499377 | -0.556011 |
| 6 | 0 | -3.909477 | 0.728491  | -0.513752 |
| 6 | 0 | -5.167586 | -1.406530 | -0.471595 |
| 6 | 0 | -2.696273 | 1.412150  | -0.554735 |
| 6 | 0 | -5.167605 | 1.406325  | -0.471579 |
| 6 | 0 | -6.378348 | -0.749896 | -0.433704 |
| 1 | 0 | -5.151641 | -2.492800 | -0.479504 |
| 1 | 0 | -2.696889 | 2.499205  | -0.555957 |
| 6 | 0 | -6.378370 | 0.749700  | -0.433701 |
| 1 | 0 | -5.151569 | 2.492606  | -0.479490 |

**Sum-B5-Sum**

|   |   |            |           |           |
|---|---|------------|-----------|-----------|
| 6 | 0 | 12.320877  | 0.000006  | 1.919138  |
| 6 | 0 | 7.827944   | -2.865552 | -0.174816 |
| 6 | 0 | 7.827940   | 2.865543  | -0.174802 |
| 1 | 0 | 13.394627  | 0.000004  | 1.684543  |
| 1 | 0 | 12.231613  | 0.000013  | 3.011438  |
| 1 | 0 | 7.699132   | -3.654660 | -0.929434 |
| 1 | 0 | 7.217212   | -3.149972 | 0.690611  |
| 1 | 0 | 7.699071   | 3.654695  | -0.929360 |
| 1 | 0 | 7.217236   | 3.149923  | 0.690669  |
| 6 | 0 | 10.792155  | -0.720525 | 0.239482  |
| 6 | 0 | 9.705148   | -1.414269 | -0.266645 |
| 6 | 0 | 9.705134   | 1.414270  | -0.266635 |
| 6 | 0 | 10.792152  | 0.720528  | 0.239481  |
| 6 | 0 | 8.570828   | 0.709305  | -0.811679 |
| 6 | 0 | 8.570842   | -0.709307 | -0.811703 |
| 6 | 0 | 11.579469  | -1.219465 | 1.284447  |
| 6 | 0 | 9.320130   | -2.665663 | 0.230034  |
| 6 | 0 | 9.320126   | 2.665666  | 0.230029  |
| 6 | 0 | 11.579471  | 1.219474  | 1.284439  |
| 6 | 0 | 7.425536   | 1.457623  | -0.709777 |
| 6 | 0 | 7.425539   | -1.457608 | -0.709777 |
| 6 | 0 | 11.299110  | -2.532969 | 1.703029  |
| 6 | 0 | 10.177182  | -3.252002 | 1.178387  |
| 6 | 0 | 10.177188  | 3.252021  | 1.178368  |
| 6 | 0 | 11.299117  | 2.532988  | 1.703006  |
| 1 | 0 | 11.852329  | -2.987626 | 2.520163  |
| 1 | 0 | 9.939411   | 4.212963  | 1.626149  |
| 1 | 0 | 11.852331  | 2.987650  | 2.520140  |
| 1 | 0 | 9.939393   | -4.212937 | 1.626180  |
| 6 | 0 | -7.425527  | -1.457625 | -0.709733 |
| 6 | 0 | -7.827952  | -2.865585 | -0.174812 |
| 6 | 0 | -8.570812  | -0.709325 | -0.811636 |
| 6 | 0 | -7.425534  | 1.457616  | -0.709758 |
| 1 | 0 | -7.699162  | -3.654649 | -0.929482 |
| 1 | 0 | -7.217202  | -3.150064 | 0.690584  |
| 6 | 0 | -9.320135  | -2.665706 | 0.230026  |
| 6 | 0 | -9.705118  | -1.414269 | -0.266573 |
| 6 | 0 | -8.570815  | 0.709312  | -0.811648 |
| 6 | 0 | -7.827960  | 2.865581  | -0.174851 |
| 6 | 0 | -10.177290 | -3.252100 | 1.178246  |

|   |   |            |           |           |
|---|---|------------|-----------|-----------|
| 6 | 0 | -10.792115 | -0.720528 | 0.239556  |
| 6 | 0 | -9.705123  | 1.414260  | -0.266595 |
| 1 | 0 | -7.699169  | 3.654639  | -0.929526 |
| 1 | 0 | -7.217211  | 3.150066  | 0.690543  |
| 6 | 0 | -9.320144  | 2.665705  | 0.229986  |
| 6 | 0 | -11.299183 | -2.533042 | 1.702944  |
| 1 | 0 | -9.939551  | -4.213058 | 1.626015  |
| 6 | 0 | -10.792117 | 0.720523  | 0.239545  |
| 6 | 0 | -11.579470 | -1.219483 | 1.284484  |
| 6 | 0 | -10.177302 | 3.252112  | 1.178196  |
| 1 | 0 | -11.852415 | -2.987749 | 2.520040  |
| 6 | 0 | -11.579475 | 1.219491  | 1.284465  |
| 6 | 0 | -12.320782 | 0.000008  | 1.919275  |
| 6 | 0 | -11.299194 | 2.533058  | 1.702904  |
| 1 | 0 | -9.939565  | 4.213077  | 1.625951  |
| 1 | 0 | -13.394551 | 0.000004  | 1.684763  |
| 1 | 0 | -12.231442 | 0.000016  | 3.011570  |
| 1 | 0 | -11.852428 | 2.987777  | 2.519993  |
| 6 | 0 | -6.162062  | -0.753708 | -0.791639 |
| 6 | 0 | -6.162062  | 0.753701  | -0.791659 |
| 6 | 0 | -4.939033  | -1.411817 | -0.785759 |
| 6 | 0 | -4.939039  | 1.411814  | -0.785803 |
| 6 | 0 | -3.690967  | -0.730801 | -0.787831 |
| 1 | 0 | -4.926701  | -2.498550 | -0.790409 |
| 6 | 0 | -3.690964  | 0.730799  | -0.787855 |
| 1 | 0 | -4.926708  | 2.498547  | -0.790474 |
| 6 | 0 | -2.469458  | -1.412612 | -0.791182 |
| 6 | 0 | -2.469467  | 1.412617  | -0.791232 |
| 6 | 0 | -1.230559  | -0.732830 | -0.791851 |
| 1 | 0 | -2.469880  | -2.499709 | -0.793132 |
| 6 | 0 | -1.230555  | 0.732834  | -0.791893 |
| 1 | 0 | -2.469887  | 2.499713  | -0.793218 |
| 6 | 0 | 0.000000   | -1.413350 | -0.792361 |
| 6 | 0 | -0.000010  | 1.413348  | -0.792378 |
| 6 | 0 | 1.230589   | -0.732833 | -0.791974 |
| 1 | 0 | 0.000000   | -2.500400 | -0.792906 |
| 6 | 0 | 1.230574   | 0.732846  | -0.791847 |
| 1 | 0 | 0.000027   | 2.500401  | -0.792958 |
| 6 | 0 | 2.469461   | -1.412625 | -0.791290 |
| 6 | 0 | 3.690994   | -0.730806 | -0.787874 |
| 1 | 0 | 2.469886   | -2.499723 | -0.793262 |
| 6 | 0 | 2.469474   | 1.412603  | -0.791154 |
| 6 | 0 | 3.690997   | 0.730788  | -0.787813 |
| 6 | 0 | 4.939055   | -1.411818 | -0.785848 |
| 1 | 0 | 2.469894   | 2.499705  | -0.793062 |
| 6 | 0 | 4.939054   | 1.411798  | -0.785708 |
| 6 | 0 | 6.162089   | -0.753713 | -0.791677 |
| 1 | 0 | 4.926721   | -2.498555 | -0.790554 |
| 6 | 0 | 6.162093   | 0.753688  | -0.791620 |
| 1 | 0 | 4.926731   | 2.498534  | -0.790257 |

**Cor-B5-Cor-F**

|   |   |           |           |           |
|---|---|-----------|-----------|-----------|
| 6 | 0 | 9.866051  | 1.149810  | -0.351701 |
| 6 | 0 | 8.558428  | 0.720482  | -0.673690 |
| 6 | 0 | 8.558443  | -0.720300 | -0.673822 |
| 6 | 0 | 9.866078  | -1.149660 | -0.351920 |
| 6 | 0 | 10.674049 | 0.000066  | -0.153415 |
| 6 | 0 | 10.150950 | 2.384117  | 0.222197  |
| 6 | 0 | 7.440001  | 1.491533  | -0.451442 |
| 6 | 0 | 7.440035  | -1.491421 | -0.451716 |
| 6 | 0 | 10.151008 | -2.384072 | 0.221737  |

|   |   |            |           |           |
|---|---|------------|-----------|-----------|
| 6 | 0 | 11.817826  | 0.000003  | 0.629455  |
| 6 | 0 | 9.015459   | 3.271690  | 0.294842  |
| 6 | 0 | 7.721615   | 2.841892  | -0.022619 |
| 6 | 0 | 7.721683   | -2.841852 | -0.023150 |
| 6 | 0 | 9.015537   | -3.271684 | 0.294221  |
| 6 | 0 | 11.447429  | -2.451305 | 0.872817  |
| 6 | 0 | 12.238519  | -1.320180 | 1.066476  |
| 6 | 0 | 12.238483  | 1.320113  | 1.066737  |
| 6 | 0 | 11.447364  | 2.451255  | 0.873299  |
| 1 | 0 | 6.902386   | 3.534010  | 0.147474  |
| 1 | 0 | 6.902470   | -3.534022 | 0.146814  |
| 1 | 0 | 11.780450  | -3.394225 | 1.298052  |
| 1 | 0 | 13.158812  | -1.423793 | 1.634818  |
| 1 | 0 | 13.158775  | 1.423638  | 1.635099  |
| 1 | 0 | 11.780362  | 3.394101  | 1.298716  |
| 6 | 0 | -7.440008  | -1.491534 | -0.451473 |
| 6 | 0 | -7.440026  | 1.491386  | -0.451775 |
| 6 | 0 | -8.558441  | -0.720482 | -0.673709 |
| 6 | 0 | -7.721612  | -2.841899 | -0.022645 |
| 6 | 0 | -8.558449  | 0.720286  | -0.673851 |
| 6 | 0 | -7.721673  | 2.841864  | -0.023297 |
| 6 | 0 | -9.866060  | -1.149809 | -0.351669 |
| 6 | 0 | -9.015426  | -3.271674 | 0.294918  |
| 1 | 0 | -6.902355  | -3.533990 | 0.147440  |
| 6 | 0 | -9.866080  | 1.149666  | -0.351919 |
| 6 | 0 | -9.015504  | 3.271705  | 0.294130  |
| 1 | 0 | -6.902460  | 3.534056  | 0.146586  |
| 6 | 0 | -10.674033 | -0.000059 | -0.153382 |
| 6 | 0 | -10.150937 | -2.384100 | 0.222257  |
| 6 | 0 | -10.150995 | 2.384088  | 0.221711  |
| 6 | 0 | -11.817800 | 0.000018  | 0.629509  |
| 6 | 0 | -11.447326 | -2.451234 | 0.873389  |
| 6 | 0 | -11.447396 | 2.451338  | 0.872811  |
| 6 | 0 | -12.238446 | -1.320079 | 1.066822  |
| 6 | 0 | -12.238484 | 1.320214  | 1.066511  |
| 1 | 0 | -11.780298 | -3.394065 | 1.298856  |
| 1 | 0 | -11.780395 | 3.394265  | 1.298052  |
| 1 | 0 | -13.158712 | -1.423598 | 1.635224  |
| 1 | 0 | -13.158763 | 1.423837  | 1.634874  |
| 6 | 0 | -1.229463  | -0.731125 | -0.488760 |
| 6 | 0 | -1.229476  | 0.731076  | -0.488685 |
| 6 | 0 | 0.000003   | -1.412367 | -0.489097 |
| 6 | 0 | -0.000019  | 1.412316  | -0.488925 |
| 6 | 0 | 1.229413   | -0.731115 | -0.488784 |
| 1 | 0 | 0.000005   | -2.499326 | -0.489484 |
| 6 | 0 | 1.229394   | 0.731088  | -0.488683 |
| 1 | 0 | -0.000049  | 2.499280  | -0.489171 |
| 6 | 0 | 2.471298   | -1.411879 | -0.488455 |
| 6 | 0 | 2.471269   | 1.411885  | -0.488247 |
| 6 | 0 | 3.686451   | -0.728027 | -0.485772 |
| 1 | 0 | 2.471888   | -2.498884 | -0.489939 |
| 6 | 0 | 3.686433   | 0.728056  | -0.485658 |
| 1 | 0 | 2.471839   | 2.498890  | -0.489569 |
| 6 | 0 | 4.944396   | -1.406194 | -0.485328 |
| 6 | 0 | 4.944365   | 1.406256  | -0.485094 |
| 6 | 0 | 6.156168   | -0.749377 | -0.489078 |
| 1 | 0 | 4.928204   | -2.492430 | -0.492973 |
| 6 | 0 | 6.156152   | 0.749466  | -0.488948 |
| 1 | 0 | 4.928148   | 2.492492  | -0.492561 |
| 6 | 0 | -2.471292  | -1.411923 | -0.488370 |
| 6 | 0 | -2.471316  | 1.411847  | -0.488303 |
| 6 | 0 | -3.686474  | -0.728075 | -0.485731 |

|   |   |           |           |           |
|---|---|-----------|-----------|-----------|
| 1 | 0 | -2.471885 | -2.498923 | -0.489818 |
| 6 | 0 | -3.686488 | 0.727981  | -0.485725 |
| 1 | 0 | -2.471936 | 2.498851  | -0.489712 |
| 6 | 0 | -4.944396 | -1.406270 | -0.485211 |
| 6 | 0 | -4.944411 | 1.406158  | -0.485293 |
| 6 | 0 | -6.156183 | -0.749441 | -0.489026 |
| 1 | 0 | -4.928200 | -2.492502 | -0.492712 |
| 6 | 0 | -6.156199 | 0.749343  | -0.489146 |
| 1 | 0 | -4.928216 | 2.492392  | -0.492901 |
| 9 | 0 | -9.173365 | 4.519316  | 0.785095  |
| 9 | 0 | 9.173293  | 4.519174  | 0.786140  |
| 9 | 0 | -9.173270 | -4.519148 | 0.786237  |
| 9 | 0 | 9.173405  | -4.519258 | 0.785278  |

**Sum-B5-Cor-F**

|   |   |            |           |           |
|---|---|------------|-----------|-----------|
| 6 | 0 | -10.095673 | -1.149747 | -0.221610 |
| 6 | 0 | -10.894719 | 0.000045  | 0.010204  |
| 6 | 0 | -10.095619 | 1.149778  | -0.221684 |
| 6 | 0 | -8.802363  | 0.720462  | -0.597305 |
| 6 | 0 | -8.802419  | -0.720538 | -0.597303 |
| 6 | 0 | -10.356841 | -2.384137 | 0.363529  |
| 6 | 0 | -12.005122 | 0.000094  | 0.839699  |
| 6 | 0 | -10.356750 | 2.384219  | 0.363322  |
| 6 | 0 | -7.675749  | 1.491585  | -0.420871 |
| 6 | 0 | -7.675807  | -1.491661 | -0.420849 |
| 6 | 0 | -11.625297 | -2.451217 | 1.067455  |
| 6 | 0 | -12.407612 | -1.320010 | 1.293686  |
| 6 | 0 | -12.407609 | 1.320280  | 1.293509  |
| 6 | 0 | -11.625260 | 2.451427  | 1.067173  |
| 6 | 0 | -9.219404  | 3.271788  | 0.389226  |
| 6 | 0 | -7.939675  | 2.841841  | 0.019135  |
| 6 | 0 | -7.939803  | -2.841895 | 0.019212  |
| 6 | 0 | -9.219527  | -3.271748 | 0.389444  |
| 1 | 0 | -11.940629 | -3.394129 | 1.506036  |
| 1 | 0 | -13.303720 | -1.423511 | 1.899486  |
| 1 | 0 | -13.303714 | 1.423871  | 1.899295  |
| 1 | 0 | -11.940535 | 3.394402  | 1.505663  |
| 1 | 0 | -7.114051  | 3.533777  | 0.155796  |
| 1 | 0 | -7.114234  | -3.533886 | 0.155952  |
| 1 | 0 | 11.698137  | -2.987472 | 2.229431  |
| 6 | 0 | 11.122236  | -2.532831 | 1.428135  |
| 6 | 0 | 9.985956   | -3.251956 | 0.935369  |
| 6 | 0 | 11.390777  | -1.219393 | 1.001815  |
| 6 | 0 | 9.102530   | -2.665690 | 0.011526  |
| 6 | 0 | 12.149973  | 0.000021  | 1.615139  |
| 6 | 0 | 10.574263  | -0.720445 | -0.020554 |
| 6 | 0 | 7.599629   | -2.865752 | -0.351329 |
| 6 | 0 | 9.473499   | -1.414307 | -0.495785 |
| 6 | 0 | 11.390772  | 1.219443  | 1.001837  |
| 1 | 0 | 13.216507  | 0.000026  | 1.349708  |
| 1 | 0 | 12.092202  | 0.000009  | 2.709538  |
| 6 | 0 | 10.574254  | 0.720511  | -0.020534 |
| 6 | 0 | 7.182048   | -1.457517 | -0.873957 |
| 1 | 0 | 7.450079   | -3.654206 | -1.102792 |
| 1 | 0 | 7.013465   | -3.151213 | 0.530582  |
| 6 | 0 | 8.324237   | -0.709097 | -1.008058 |
| 6 | 0 | 11.122230  | 2.532873  | 1.428180  |
| 6 | 0 | 9.473476   | 1.414371  | -0.495736 |
| 6 | 0 | 8.324222   | 0.709160  | -1.008026 |
| 6 | 0 | 9.985936   | 3.251996  | 0.935444  |
| 1 | 0 | 11.698131  | 2.987497  | 2.229487  |

|                     |   |           |           |           |   |   |            |           |           |
|---------------------|---|-----------|-----------|-----------|---|---|------------|-----------|-----------|
| 6                   | 0 | 9.102496  | 2.665733  | 0.011613  | 6 | 0 | 11.579477  | 1.219473  | 1.151870  |
| 6                   | 0 | 7.182020  | 1.457551  | -0.873888 | 6 | 0 | 7.425542   | 1.457622  | -0.842346 |
| 6                   | 0 | 7.599573  | 2.865766  | -0.351176 | 6 | 0 | 7.425545   | -1.457609 | -0.842346 |
| 1                   | 0 | 7.449975  | 3.654263  | -1.102583 | 6 | 0 | 11.299116  | -2.532970 | 1.570460  |
| 1                   | 0 | 7.013425  | 3.151151  | 0.530771  | 6 | 0 | 10.177188  | -3.252003 | 1.045818  |
| 6                   | 0 | 5.917329  | 0.753341  | -0.919011 | 6 | 0 | 10.177194  | 3.252020  | 1.045799  |
| 6                   | 0 | 4.694340  | 1.411570  | -0.876802 | 6 | 0 | 11.299123  | 2.532987  | 1.570437  |
| 6                   | 0 | 5.917343  | -0.753329 | -0.919051 | 1 | 0 | 11.852335  | -2.987627 | 2.387594  |
| 6                   | 0 | 3.447868  | 0.730320  | -0.841309 | 1 | 0 | 11.852337  | 2.987649  | 2.387571  |
| 1                   | 0 | 4.681906  | 2.498265  | -0.880982 | 6 | 0 | -7.425521  | -1.457626 | -0.842302 |
| 6                   | 0 | 4.694367  | -1.411581 | -0.876881 | 6 | 0 | -7.827946  | -2.865586 | -0.307381 |
| 6                   | 0 | 3.447879  | -0.730354 | -0.841349 | 6 | 0 | -8.570806  | -0.709326 | -0.944205 |
| 6                   | 0 | 2.225420  | 1.412253  | -0.807039 | 6 | 0 | -7.425528  | 1.457615  | -0.842327 |
| 1                   | 0 | 4.681950  | -2.498276 | -0.881117 | 1 | 0 | -7.699156  | -3.654650 | -1.062051 |
| 6                   | 0 | 2.225444  | -1.412307 | -0.807122 | 1 | 0 | -7.217196  | -3.150065 | 0.558015  |
| 6                   | 0 | 0.989215  | 0.732111  | -0.768825 | 6 | 0 | -9.320129  | -2.665707 | 0.097457  |
| 1                   | 0 | 2.225729  | 2.499316  | -0.808868 | 6 | 0 | -9.705112  | -1.414270 | -0.399142 |
| 6                   | 0 | 0.989215  | -0.732177 | -0.768868 | 6 | 0 | -8.570809  | 0.709311  | -0.944217 |
| 1                   | 0 | 2.225760  | -2.499369 | -0.809007 | 6 | 0 | -7.827954  | 2.865580  | -0.307420 |
| 6                   | 0 | -0.243404 | 1.412822  | -0.729450 | 6 | 0 | -10.177284 | -3.252101 | 1.045677  |
| 6                   | 0 | -0.243381 | -1.412934 | -0.729512 | 6 | 0 | -10.792109 | -0.720529 | 0.106987  |
| 1                   | 0 | -0.243530 | 2.499829  | -0.729734 | 6 | 0 | -9.705117  | 1.414259  | -0.399164 |
| 6                   | 0 | -1.469499 | 0.731822  | -0.688356 | 1 | 0 | -7.699163  | 3.654638  | -1.062095 |
| 6                   | 0 | -1.469497 | -0.731951 | -0.688366 | 1 | 0 | -7.217205  | 3.150065  | 0.557974  |
| 1                   | 0 | -0.243428 | -2.499937 | -0.729887 | 6 | 0 | -9.320138  | 2.665704  | 0.097417  |
| 6                   | 0 | -2.712624 | -1.412332 | -0.645178 | 6 | 0 | -11.299177 | -2.533043 | 1.570375  |
| 6                   | 0 | -3.925669 | -0.728687 | -0.599348 | 6 | 0 | -10.792111 | 0.720522  | 0.106976  |
| 1                   | 0 | -2.713307 | -2.499376 | -0.646395 | 6 | 0 | -11.579464 | -1.219484 | 1.151915  |
| 6                   | 0 | -3.925687 | 0.728492  | -0.599308 | 6 | 0 | -10.177296 | 3.252111  | 1.045627  |
| 6                   | 0 | -5.183619 | -1.406529 | -0.552179 | 1 | 0 | -11.852409 | -2.987750 | 2.387471  |
| 6                   | 0 | -2.712655 | 1.412151  | -0.645095 | 6 | 0 | -11.579469 | 1.219490  | 1.151896  |
| 6                   | 0 | -5.183638 | 1.406326  | -0.552144 | 6 | 0 | -12.320776 | 0.000007  | 1.786706  |
| 6                   | 0 | -6.394221 | -0.749896 | -0.509484 | 6 | 0 | -11.299188 | 2.533057  | 1.570335  |
| 1                   | 0 | -5.167706 | -2.492799 | -0.560158 | 1 | 0 | -13.394545 | 0.000003  | 1.552194  |
| 1                   | 0 | -2.713276 | 2.499206  | -0.646308 | 1 | 0 | -12.231436 | 0.000015  | 2.879001  |
| 6                   | 0 | -6.394243 | 0.749700  | -0.509471 | 1 | 0 | -11.852422 | 2.987776  | 2.387424  |
| 1                   | 0 | -5.167634 | 2.492607  | -0.560111 | 6 | 0 | -6.162056  | -0.753709 | -0.924208 |
| 9                   | 0 | -9.356935 | 4.519223  | 0.886710  | 6 | 0 | -6.162056  | 0.753700  | -0.924228 |
| 9                   | 0 | -9.357080 | -4.519133 | 0.887048  | 6 | 0 | -4.939027  | -1.411818 | -0.918328 |
| 9                   | 0 | 9.706298  | 4.445909  | 1.500133  | 6 | 0 | -4.939033  | 1.411813  | -0.918372 |
| 9                   | 0 | 9.706333  | -4.445893 | 1.500016  | 6 | 0 | -3.690961  | -0.730802 | -0.920400 |
| <b>Sum-B5-Sum-F</b> |   |           |           |           | 1 | 0 | -4.926695  | -2.498551 | -0.922978 |
| 6                   | 0 | 12.320883 | 0.000005  | 1.786569  | 6 | 0 | -3.690958  | 0.730798  | -0.920424 |
| 6                   | 0 | 7.827950  | -2.865553 | -0.307385 | 1 | 0 | -4.926702  | 2.498546  | -0.923043 |
| 6                   | 0 | 7.827946  | 2.865542  | -0.307371 | 6 | 0 | -2.469452  | -1.412613 | -0.923751 |
| 1                   | 0 | 13.394633 | 0.000003  | 1.551974  | 6 | 0 | -2.469461  | 1.412616  | -0.923801 |
| 1                   | 0 | 12.231619 | 0.000012  | 2.878869  | 6 | 0 | -1.230553  | -0.732831 | -0.924420 |
| 1                   | 0 | 7.699138  | -3.654661 | -1.062003 | 1 | 0 | -2.469874  | -2.499710 | -0.925701 |
| 1                   | 0 | 7.217218  | -3.149973 | 0.558042  | 6 | 0 | -1.230549  | 0.732833  | -0.924462 |
| 1                   | 0 | 7.699077  | 3.654694  | -1.061929 | 1 | 0 | -2.469881  | 2.499712  | -0.925787 |
| 1                   | 0 | 7.217242  | 3.149922  | 0.558100  | 6 | 0 | 0.000006   | -1.413351 | -0.924930 |
| 6                   | 0 | 10.792161 | -0.720526 | 0.106913  | 6 | 0 | -0.000004  | 1.413347  | -0.924947 |
| 6                   | 0 | 9.705154  | -1.414270 | -0.399214 | 6 | 0 | 1.230595   | -0.732834 | -0.924543 |
| 6                   | 0 | 9.705140  | 1.414269  | -0.399204 | 1 | 0 | 0.000006   | -2.500401 | -0.925475 |
| 6                   | 0 | 10.792158 | 0.720527  | 0.106912  | 6 | 0 | 1.230580   | 0.732845  | -0.924416 |
| 6                   | 0 | 8.570834  | 0.709304  | -0.944248 | 1 | 0 | 0.000033   | 2.500400  | -0.925527 |
| 6                   | 0 | 8.570848  | -0.709308 | -0.944272 | 6 | 0 | 2.469467   | -1.412626 | -0.923859 |
| 6                   | 0 | 11.579475 | -1.219466 | 1.151878  | 6 | 0 | 3.691000   | -0.730807 | -0.920443 |
| 6                   | 0 | 9.320136  | -2.665664 | 0.097465  | 1 | 0 | 2.469892   | -2.499724 | -0.925831 |
| 6                   | 0 | 9.320132  | 2.665665  | 0.097460  | 6 | 0 | 2.469480   | 1.412602  | -0.923723 |
|                     |   |           |           |           | 6 | 0 | 3.691003   | 0.730787  | -0.920382 |
|                     |   |           |           |           | 6 | 0 | 4.939061   | -1.411819 | -0.918417 |

|   |   |           |           |           |
|---|---|-----------|-----------|-----------|
| 1 | 0 | 2.469900  | 2.499704  | -0.925631 |
| 6 | 0 | 4.939060  | 1.411797  | -0.918277 |
| 6 | 0 | 6.162095  | -0.753714 | -0.924246 |
| 1 | 0 | 4.926727  | -2.498556 | -0.923123 |
| 6 | 0 | 6.162099  | 0.753687  | -0.924189 |
| 1 | 0 | 4.926737  | 2.498533  | -0.922826 |
| 9 | 0 | -9.881899 | 4.446144  | 1.601979  |
| 9 | 0 | -9.881885 | -4.446125 | 1.602046  |
| 9 | 0 | 9.881748  | 4.446025  | 1.602183  |
| 9 | 0 | 9.881727  | -4.445998 | 1.602217  |

**Cor-B5-Cor-CN**

|   |   |            |           |           |
|---|---|------------|-----------|-----------|
| 6 | 0 | 9.866049   | 1.149821  | -0.418010 |
| 6 | 0 | 8.558426   | 0.720491  | -0.739999 |
| 6 | 0 | 8.558444   | -0.720291 | -0.740131 |
| 6 | 0 | 9.866079   | -1.149649 | -0.418229 |
| 6 | 0 | 10.674048  | 0.000078  | -0.219724 |
| 6 | 0 | 10.150946  | 2.384129  | 0.155888  |
| 6 | 0 | 7.439999   | 1.491541  | -0.517751 |
| 6 | 0 | 7.440037   | -1.491413 | -0.518025 |
| 6 | 0 | 10.151011  | -2.384060 | 0.155428  |
| 6 | 0 | 11.817825  | 0.000017  | 0.563146  |
| 6 | 0 | 9.015454   | 3.271700  | 0.228533  |
| 6 | 0 | 7.721611   | 2.841900  | -0.088928 |
| 6 | 0 | 7.721686   | -2.841844 | -0.089459 |
| 6 | 0 | 9.015541   | -3.271674 | 0.227912  |
| 6 | 0 | 11.447432  | -2.451292 | 0.806508  |
| 6 | 0 | 12.238520  | -1.320166 | 1.000167  |
| 6 | 0 | 12.238481  | 1.320127  | 1.000428  |
| 6 | 0 | 11.447360  | 2.451268  | 0.806990  |
| 1 | 0 | 6.902381   | 3.534017  | 0.081165  |
| 1 | 0 | 6.902474   | -3.534015 | 0.080505  |
| 1 | 0 | 11.780454  | -3.394211 | 1.231743  |
| 1 | 0 | 13.158814  | -1.423778 | 1.568509  |
| 1 | 0 | 13.158773  | 1.423653  | 1.568790  |
| 1 | 0 | 11.780357  | 3.394115  | 1.232407  |
| 6 | 0 | -7.440006  | -1.491546 | -0.517782 |
| 6 | 0 | -7.440028  | 1.491374  | -0.518084 |
| 6 | 0 | -8.558440  | -0.720494 | -0.740018 |
| 6 | 0 | -7.721609  | -2.841910 | -0.088954 |
| 6 | 0 | -8.558451  | 0.720274  | -0.740160 |
| 6 | 0 | -7.721677  | 2.841853  | -0.089606 |
| 6 | 0 | -9.866059  | -1.149823 | -0.417978 |
| 6 | 0 | -9.015422  | -3.271687 | 0.228609  |
| 1 | 0 | -6.902351  | -3.534000 | 0.081131  |
| 6 | 0 | -9.866082  | 1.149652  | -0.418228 |
| 6 | 0 | -9.015509  | 3.271692  | 0.227821  |
| 1 | 0 | -6.902465  | 3.534046  | 0.080277  |
| 6 | 0 | -10.674034 | -0.000074 | -0.219691 |
| 6 | 0 | -10.150934 | -2.384115 | 0.155948  |
| 6 | 0 | -10.150999 | 2.384073  | 0.155402  |
| 6 | 0 | -11.817801 | 0.000000  | 0.563200  |
| 6 | 0 | -11.447323 | -2.451250 | 0.807080  |
| 6 | 0 | -11.447400 | 2.451322  | 0.806502  |
| 6 | 0 | -12.238445 | -1.320096 | 1.000513  |
| 6 | 0 | -12.238486 | 1.320197  | 1.000202  |
| 1 | 0 | -11.780294 | -3.394082 | 1.232547  |
| 1 | 0 | -11.780400 | 3.394248  | 1.231743  |
| 1 | 0 | -13.158710 | -1.423616 | 1.568915  |
| 1 | 0 | -13.158765 | 1.423819  | 1.568565  |
| 6 | 0 | -1.229462  | -0.731129 | -0.555069 |

|   |   |           |           |           |
|---|---|-----------|-----------|-----------|
| 6 | 0 | -1.229478 | 0.731072  | -0.554994 |
| 6 | 0 | 0.000005  | -1.412369 | -0.555406 |
| 6 | 0 | -0.000021 | 1.412314  | -0.555234 |
| 6 | 0 | 1.229414  | -0.731115 | -0.555093 |
| 1 | 0 | 0.000008  | -2.499328 | -0.555793 |
| 6 | 0 | 1.229392  | 0.731088  | -0.554992 |
| 1 | 0 | -0.000053 | 2.499278  | -0.555480 |
| 6 | 0 | 2.471300  | -1.411878 | -0.554764 |
| 6 | 0 | 2.471267  | 1.411886  | -0.554556 |
| 6 | 0 | 3.686452  | -0.728024 | -0.552081 |
| 1 | 0 | 2.471891  | -2.498883 | -0.556248 |
| 6 | 0 | 3.686431  | 0.728059  | -0.551967 |
| 1 | 0 | 2.471835  | 2.498891  | -0.555878 |
| 6 | 0 | 4.944398  | -1.406190 | -0.551637 |
| 6 | 0 | 4.944363  | 1.406260  | -0.551403 |
| 6 | 0 | 6.156169  | -0.749371 | -0.555387 |
| 1 | 0 | 4.928207  | -2.492426 | -0.559282 |
| 6 | 0 | 6.156150  | 0.749472  | -0.555257 |
| 1 | 0 | 4.928144  | 2.492496  | -0.558870 |
| 6 | 0 | -2.471290 | -1.411928 | -0.554679 |
| 6 | 0 | -2.471318 | 1.411842  | -0.554612 |
| 6 | 0 | -3.686473 | -0.728081 | -0.552040 |
| 1 | 0 | -2.471882 | -2.498928 | -0.556127 |
| 6 | 0 | -3.686490 | 0.727975  | -0.552034 |
| 1 | 0 | -2.471940 | 2.498846  | -0.556021 |
| 6 | 0 | -4.944394 | -1.406279 | -0.551520 |
| 6 | 0 | -4.944413 | 1.406149  | -0.551602 |
| 6 | 0 | -6.156182 | -0.749450 | -0.555335 |
| 1 | 0 | -4.928197 | -2.492510 | -0.559021 |
| 6 | 0 | -6.156201 | 0.749334  | -0.555455 |
| 1 | 0 | -4.928220 | 2.492384  | -0.559210 |
| 6 | 0 | -9.195589 | 4.694892  | 0.787884  |
| 7 | 0 | -9.331234 | 5.766914  | 1.209750  |
| 6 | 0 | 9.195501  | 4.694756  | 0.788976  |
| 7 | 0 | 9.331120  | 5.766668  | 1.211127  |
| 6 | 0 | 9.195628  | -4.694832 | 0.788080  |
| 7 | 0 | 9.331279  | -5.766822 | 1.210025  |
| 6 | 0 | -9.195480 | -4.694732 | 0.789077  |
| 7 | 0 | -9.331107 | -5.766635 | 1.211247  |

**Sum-B5-Cor-CN**

|   |   |            |           |           |
|---|---|------------|-----------|-----------|
| 6 | 0 | -10.087467 | -1.149749 | -0.287204 |
| 6 | 0 | -10.886107 | 0.000041  | -0.053995 |
| 6 | 0 | -10.087413 | 1.149776  | -0.287270 |
| 6 | 0 | -8.794813  | 0.720461  | -0.665145 |
| 6 | 0 | -8.794869  | -0.720539 | -0.665149 |
| 6 | 0 | -10.347614 | -2.384141 | 0.298384  |
| 6 | 0 | -11.995064 | 0.000087  | 0.777434  |
| 6 | 0 | -10.347524 | 2.384215  | 0.298195  |
| 6 | 0 | -7.667894  | 1.491584  | -0.490671 |
| 6 | 0 | -7.667951  | -1.491662 | -0.490660 |
| 6 | 0 | -11.614842 | -2.451224 | 1.004519  |
| 6 | 0 | -12.396762 | -1.320018 | 1.232116  |
| 6 | 0 | -12.396759 | 1.320272  | 1.231949  |
| 6 | 0 | -11.614806 | 2.451420  | 1.004255  |
| 6 | 0 | -9.210136  | 3.271784  | 0.322120  |
| 6 | 0 | -7.931053  | 2.841838  | -0.050201 |
| 6 | 0 | -7.931179  | -2.841898 | -0.050145 |
| 6 | 0 | -9.210257  | -3.271752 | 0.322314  |
| 1 | 0 | -11.929409 | -3.394138 | 1.443645  |
| 1 | 0 | -13.291813 | -1.423522 | 1.839476  |

|   |   |            |           |           |
|---|---|------------|-----------|-----------|
| 1 | 0 | -13.291808 | 1.423860  | 1.839296  |
| 1 | 0 | -11.929317 | 3.394393  | 1.443297  |
| 1 | 0 | -7.105192  | 3.533774  | 0.085024  |
| 1 | 0 | -7.105374  | -3.533889 | 0.085153  |
| 1 | 0 | 11.710581  | -2.987479 | 2.125857  |
| 6 | 0 | 11.133285  | -2.532836 | 1.325567  |
| 6 | 0 | 9.996148   | -3.251959 | 0.834779  |
| 6 | 0 | 11.401083  | -1.219396 | 0.898785  |
| 6 | 0 | 9.111114   | -2.665689 | -0.087522 |
| 6 | 0 | 12.161346  | 0.000016  | 1.510790  |
| 6 | 0 | 10.582789  | -0.720445 | -0.122158 |
| 6 | 0 | 7.607583   | -2.865751 | -0.447758 |
| 6 | 0 | 9.481198   | -1.414305 | -0.595473 |
| 6 | 0 | 11.401077  | 1.219440  | 0.898816  |
| 1 | 0 | 13.227415  | 0.000023  | 1.243502  |
| 1 | 0 | 12.105482  | 0.000000  | 2.605288  |
| 6 | 0 | 10.582779  | 0.720511  | -0.122133 |
| 6 | 0 | 7.189092   | -1.457513 | -0.969653 |
| 1 | 0 | 7.456724   | -3.654202 | -1.198963 |
| 1 | 0 | 7.022956   | -3.151215 | 0.435171  |
| 6 | 0 | 8.331045   | -0.709093 | -1.105740 |
| 6 | 0 | 11.133278  | 2.532868  | 1.325631  |
| 6 | 0 | 9.481175   | 1.414373  | -0.595414 |
| 6 | 0 | 8.331030   | 0.709164  | -1.105703 |
| 6 | 0 | 9.996127   | 3.251993  | 0.834879  |
| 1 | 0 | 11.710574  | 2.987490  | 2.125935  |
| 6 | 0 | 9.111079   | 2.665734  | -0.087414 |
| 6 | 0 | 7.189063   | 1.457555  | -0.969573 |
| 6 | 0 | 7.607526   | 2.865767  | -0.447583 |
| 1 | 0 | 7.456619   | 3.654267  | -1.198726 |
| 1 | 0 | 7.022916   | 3.151149  | 0.435384  |
| 6 | 0 | 5.924296   | 0.753345  | -1.012495 |
| 6 | 0 | 4.701383   | 1.411573  | -0.968153 |
| 6 | 0 | 5.924310   | -0.753325 | -1.012541 |
| 6 | 0 | 3.454975   | 0.730323  | -0.930491 |
| 1 | 0 | 4.688941   | 2.498268  | -0.972308 |
| 6 | 0 | 4.701410   | -1.411578 | -0.968243 |
| 6 | 0 | 3.454986   | -0.730351 | -0.930537 |
| 6 | 0 | 2.232587   | 1.412255  | -0.894089 |
| 1 | 0 | 4.688985   | -2.498273 | -0.972461 |
| 6 | 0 | 2.232612   | -1.412305 | -0.894182 |
| 6 | 0 | 0.996452   | 0.732113  | -0.853724 |
| 1 | 0 | 2.232893   | 2.499318  | -0.895915 |
| 6 | 0 | 0.996452   | -0.732175 | -0.853772 |
| 1 | 0 | 2.232925   | -2.499367 | -0.896072 |
| 6 | 0 | -0.236098  | 1.412824  | -0.812199 |
| 6 | 0 | -0.236074  | -1.412932 | -0.812272 |
| 1 | 0 | -0.236225  | 2.499831  | -0.812479 |
| 6 | 0 | -1.462119  | 0.731823  | -0.768971 |
| 6 | 0 | -1.462117  | -0.731950 | -0.768987 |
| 1 | 0 | -0.236121  | -2.499935 | -0.812650 |
| 6 | 0 | -2.705167  | -1.412331 | -0.723635 |
| 6 | 0 | -3.918130  | -0.728687 | -0.675690 |
| 1 | 0 | -2.705851  | -2.499375 | -0.724856 |
| 6 | 0 | -3.918148  | 0.728492  | -0.675644 |
| 6 | 0 | -5.175996  | -1.406529 | -0.626331 |
| 6 | 0 | -2.705198  | 1.412152  | -0.723542 |
| 6 | 0 | -5.176015  | 1.406326  | -0.626286 |
| 6 | 0 | -6.386522  | -0.749896 | -0.581525 |
| 1 | 0 | -5.160096  | -2.492799 | -0.634343 |
| 1 | 0 | -2.705821  | 2.499207  | -0.724749 |
| 6 | 0 | -6.386544  | 0.749700  | -0.581506 |

|   |   |           |           |           |
|---|---|-----------|-----------|-----------|
| 1 | 0 | -5.160025 | 2.492607  | -0.634277 |
| 6 | 0 | 9.678255  | 4.613936  | 1.479602  |
| 7 | 0 | 9.438819  | 5.639815  | 1.965238  |
| 6 | 0 | 9.678294  | -4.613934 | 1.479444  |
| 7 | 0 | 9.438871  | -5.639837 | 1.965035  |
| 6 | 0 | -9.366034 | 4.694782  | 0.889899  |
| 7 | 0 | -9.483464 | 5.766650  | 1.317576  |
| 6 | 0 | -9.366180 | -4.694697 | 0.890218  |
| 7 | 0 | -9.483629 | -5.766526 | 1.317990  |

**Sum-B5-Sum-CN**

|   |   |            |           |           |
|---|---|------------|-----------|-----------|
| 6 | 0 | 12.320888  | 0.000003  | 1.688187  |
| 6 | 0 | 7.827955   | -2.865554 | -0.405767 |
| 6 | 0 | 7.827951   | 2.865541  | -0.405753 |
| 1 | 0 | 13.394638  | 0.000001  | 1.453592  |
| 1 | 0 | 12.231624  | 0.000010  | 2.780487  |
| 1 | 0 | 7.699143   | -3.654662 | -1.160385 |
| 1 | 0 | 7.217223   | -3.149974 | 0.459660  |
| 1 | 0 | 7.699082   | 3.654693  | -1.160311 |
| 1 | 0 | 7.217247   | 3.149921  | 0.459718  |
| 6 | 0 | 10.792166  | -0.720528 | 0.008531  |
| 6 | 0 | 9.705159   | -1.414271 | -0.497596 |
| 6 | 0 | 9.705145   | 1.414268  | -0.497586 |
| 6 | 0 | 10.792163  | 0.720525  | 0.008530  |
| 6 | 0 | 8.570839   | 0.709303  | -1.042630 |
| 6 | 0 | 8.570853   | -0.709309 | -1.042654 |
| 6 | 0 | 11.579480  | -1.219468 | 1.053496  |
| 6 | 0 | 9.320141   | -2.665665 | -0.000917 |
| 6 | 0 | 9.320137   | 2.665664  | -0.000922 |
| 6 | 0 | 11.579482  | 1.219471  | 1.053488  |
| 6 | 0 | 7.425547   | 1.457621  | -0.940728 |
| 6 | 0 | 7.425550   | -1.457610 | -0.940728 |
| 6 | 0 | 11.299121  | -2.532972 | 1.472078  |
| 6 | 0 | 10.177193  | -3.252004 | 0.947436  |
| 6 | 0 | 10.177199  | 3.252019  | 0.947417  |
| 6 | 0 | 11.299128  | 2.532985  | 1.472055  |
| 1 | 0 | 11.852340  | -2.987629 | 2.289212  |
| 1 | 0 | 11.852342  | 2.987647  | 2.289189  |
| 6 | 0 | -7.425516  | -1.457626 | -0.940684 |
| 6 | 0 | -7.827941  | -2.865586 | -0.405763 |
| 6 | 0 | -8.570801  | -0.709326 | -1.042587 |
| 6 | 0 | -7.425523  | 1.457615  | -0.940709 |
| 1 | 0 | -7.699151  | -3.654650 | -1.160433 |
| 1 | 0 | -7.217191  | -3.150065 | 0.459633  |
| 6 | 0 | -9.320124  | -2.665707 | -0.000925 |
| 6 | 0 | -9.705107  | -1.414270 | -0.497524 |
| 6 | 0 | -8.570804  | 0.709311  | -1.042599 |
| 6 | 0 | -7.827949  | 2.865580  | -0.405802 |
| 6 | 0 | -10.177279 | -3.252101 | 0.947295  |
| 6 | 0 | -10.792104 | -0.720529 | 0.008605  |
| 6 | 0 | -9.705112  | 1.414259  | -0.497546 |
| 1 | 0 | -7.699158  | 3.654638  | -1.160477 |
| 1 | 0 | -7.217200  | 3.150065  | 0.459592  |
| 6 | 0 | -9.320133  | 2.665704  | -0.000965 |
| 6 | 0 | -11.299172 | -2.533043 | 1.471993  |
| 6 | 0 | -10.792106 | 0.720522  | 0.008594  |
| 6 | 0 | -11.579459 | -1.219484 | 1.053533  |
| 6 | 0 | -10.177291 | 3.252111  | 0.947245  |
| 1 | 0 | -11.852404 | -2.987750 | 2.289089  |
| 6 | 0 | -11.579464 | 1.219490  | 1.053514  |
| 6 | 0 | -12.320771 | 0.000007  | 1.688324  |

|   |   |            |           |           |   |   |            |           |           |
|---|---|------------|-----------|-----------|---|---|------------|-----------|-----------|
| 6 | 0 | -11.299183 | 2.533057  | 1.471953  | 6 | 0 | 12.268480  | -1.320586 | 0.784716  |
| 1 | 0 | -13.394540 | 0.000003  | 1.453812  | 6 | 0 | 12.268480  | 1.320594  | 0.784711  |
| 1 | 0 | -12.231431 | 0.000015  | 2.780619  | 6 | 0 | 11.476163  | 2.452929  | 0.604654  |
| 1 | 0 | -11.852417 | 2.987776  | 2.289042  | 1 | 0 | 6.909987   | 3.534762  | -0.067829 |
| 6 | 0 | -6.162051  | -0.753709 | -1.022590 | 1 | 0 | 6.909989   | -3.534761 | -0.067815 |
| 6 | 0 | -6.162051  | 0.753700  | -1.022610 | 1 | 0 | 13.199162  | -1.425421 | 1.334353  |
| 6 | 0 | -4.939022  | -1.411818 | -1.016710 | 1 | 0 | 13.199161  | 1.425432  | 1.334347  |
| 6 | 0 | -4.939028  | 1.411813  | -1.016754 | 6 | 0 | -7.437646  | -1.488793 | -0.658136 |
| 6 | 0 | -3.690956  | -0.730802 | -1.018782 | 6 | 0 | -7.437647  | 1.488778  | -0.658165 |
| 1 | 0 | -4.926690  | -2.498551 | -1.021360 | 6 | 0 | -8.556596  | -0.718787 | -0.886824 |
| 6 | 0 | -3.690953  | 0.730798  | -1.018806 | 6 | 0 | -7.720452  | -2.835663 | -0.243627 |
| 1 | 0 | -4.926697  | 2.498546  | -1.021425 | 6 | 0 | -8.556597  | 0.718766  | -0.886838 |
| 6 | 0 | -2.469447  | -1.412614 | -1.022133 | 6 | 0 | -7.720455  | 2.835656  | -0.243684 |
| 6 | 0 | -2.469456  | 1.412615  | -1.022183 | 6 | 0 | -9.868485  | -1.148367 | -0.585758 |
| 6 | 0 | -1.230548  | -0.732832 | -1.022802 | 6 | 0 | -9.028528  | -3.275549 | 0.057233  |
| 1 | 0 | -2.469869  | -2.499711 | -1.024083 | 1 | 0 | -6.909986  | -3.534763 | -0.067787 |
| 6 | 0 | -1.230544  | 0.732832  | -1.022844 | 6 | 0 | -9.868486  | 1.148351  | -0.585781 |
| 1 | 0 | -2.469876  | 2.499711  | -1.024169 | 6 | 0 | -9.028531  | 3.275547  | 0.057166  |
| 6 | 0 | 0.000011   | -1.413352 | -1.023312 | 1 | 0 | -6.909990  | 3.534761  | -0.067860 |
| 6 | 0 | 0.000001   | 1.413346  | -1.023329 | 6 | 0 | -10.680546 | -0.000006 | -0.402296 |
| 6 | 0 | 1.230600   | -0.732835 | -1.022925 | 6 | 0 | -10.171077 | -2.379541 | -0.023296 |
| 1 | 0 | 0.000011   | -2.500402 | -1.023857 | 6 | 0 | -10.171079 | 2.379536  | -0.023345 |
| 6 | 0 | 1.230585   | 0.732844  | -1.022798 | 6 | 0 | -11.838368 | 0.000001  | 0.357883  |
| 1 | 0 | 0.000038   | 2.500399  | -1.023909 | 6 | 0 | -11.476162 | -2.452922 | 0.604687  |
| 6 | 0 | 2.469472   | -1.412627 | -1.022241 | 6 | 0 | -11.476164 | 2.452929  | 0.604638  |
| 6 | 0 | 3.691005   | -0.730808 | -1.018825 | 6 | 0 | -12.268479 | -1.320585 | 0.784731  |
| 1 | 0 | 2.469897   | -2.499725 | -1.024213 | 6 | 0 | -12.268480 | 1.320595  | 0.784704  |
| 6 | 0 | 2.469485   | 1.412601  | -1.022105 | 1 | 0 | -13.199160 | -1.425416 | 1.334369  |
| 6 | 0 | 3.691008   | 0.730786  | -1.018764 | 1 | 0 | -13.199161 | 1.425436  | 1.334341  |
| 6 | 0 | 4.939066   | -1.411820 | -1.016799 | 6 | 0 | -1.228737  | -0.731002 | -0.672949 |
| 1 | 0 | 2.469905   | 2.499703  | -1.024013 | 6 | 0 | -1.228738  | 0.730993  | -0.672957 |
| 6 | 0 | 4.939065   | 1.411796  | -1.016659 | 6 | 0 | 0.000000   | -1.413174 | -0.672551 |
| 6 | 0 | 6.162100   | -0.753715 | -1.022628 | 6 | 0 | -0.000001  | 1.413166  | -0.672566 |
| 1 | 0 | 4.926732   | -2.498557 | -1.021505 | 6 | 0 | 1.228738   | -0.731001 | -0.672949 |
| 6 | 0 | 6.162104   | 0.753686  | -1.022571 | 1 | 0 | 0.000001   | -2.499867 | -0.672461 |
| 1 | 0 | 4.926742   | 2.498532  | -1.021208 | 6 | 0 | 1.228737   | 0.730994  | -0.672956 |
| 6 | 0 | 9.840172   | 4.614069  | 1.582107  | 1 | 0 | -0.000001  | 2.499860  | -0.672486 |
| 7 | 0 | 9.586307   | 5.640029  | 2.060185  | 6 | 0 | 2.470045   | -1.412772 | -0.674394 |
| 6 | 0 | 9.840148   | -4.614043 | 1.582142  | 6 | 0 | 2.470044   | 1.412766  | -0.674405 |
| 7 | 0 | 9.586271   | -5.639994 | 2.060232  | 6 | 0 | 3.684260   | -0.727907 | -0.674833 |
| 6 | 0 | -9.840305  | -4.614173 | 1.581967  | 1 | 0 | 2.470487   | -2.499516 | -0.675344 |
| 7 | 0 | -9.586481  | -5.640149 | 2.060032  | 6 | 0 | 3.684260   | 0.727901  | -0.674838 |
| 6 | 0 | -9.840320  | 4.614193  | 1.581897  | 1 | 0 | 2.470485   | 2.499510  | -0.675365 |
| 7 | 0 | -9.586497  | 5.640176  | 2.059947  | 6 | 0 | 4.941765   | -1.407016 | -0.678268 |

**Cor-B5-Cor-CN2**

|   |   |           |           |           |   |   |           |           |           |
|---|---|-----------|-----------|-----------|---|---|-----------|-----------|-----------|
| 6 | 0 | 9.868485  | 1.148360  | -0.585774 | 6 | 0 | 6.152028  | 0.748935  | -0.687607 |
| 6 | 0 | 8.556596  | 0.718776  | -0.886833 | 1 | 0 | 4.924336  | 2.493121  | -0.685414 |
| 6 | 0 | 8.556596  | -0.718777 | -0.886830 | 6 | 0 | -2.470044 | -1.412773 | -0.674391 |
| 6 | 0 | 9.868485  | -1.148359 | -0.585769 | 6 | 0 | -2.470045 | 1.412764  | -0.674409 |
| 6 | 0 | 10.680546 | 0.000000  | -0.402299 | 6 | 0 | -3.684260 | -0.727909 | -0.674831 |
| 6 | 0 | 10.171077 | 2.379540  | -0.023328 | 1 | 0 | -2.470486 | -2.499518 | -0.675339 |
| 6 | 0 | 7.437646  | 1.488785  | -0.658153 | 6 | 0 | -3.684261 | 0.727899  | -0.674841 |
| 6 | 0 | 7.437647  | -1.488786 | -0.658147 | 1 | 0 | -2.470488 | 2.499509  | -0.675371 |
| 6 | 0 | 10.171079 | -2.379537 | -0.023318 | 6 | 0 | -4.941765 | -1.407020 | -0.678262 |
| 6 | 0 | 11.838368 | 0.000003  | 0.357880  | 6 | 0 | -4.941766 | 1.407008  | -0.678285 |
| 6 | 0 | 9.028528  | 3.275550  | 0.057192  | 6 | 0 | -6.152028 | -0.748942 | -0.687599 |
| 6 | 0 | 7.720453  | 2.835660  | -0.243661 | 1 | 0 | -4.924336 | -2.493129 | -0.685386 |
| 6 | 0 | 7.720454  | -2.835659 | -0.243649 | 6 | 0 | -6.152029 | 0.748930  | -0.687613 |
| 6 | 0 | 9.028530  | -3.275547 | 0.057205  | 1 | 0 | -4.924338 | 2.493117  | -0.685427 |
| 6 | 0 | 11.476164 | -2.452922 | 0.604664  | 6 | 0 | -9.211492 | 4.604773  | 0.551597  |



|   |   |            |           |          |
|---|---|------------|-----------|----------|
| 7 | 0 | -9.387486  | 5.693072  | 0.958525 |
| 6 | 0 | 9.211487   | 4.604771  | 0.551634 |
| 7 | 0 | 9.387480   | 5.693067  | 0.958571 |
| 6 | 0 | 9.211491   | -4.604766 | 0.551652 |
| 7 | 0 | 9.387485   | -5.693060 | 0.958593 |
| 6 | 0 | -9.211486  | -4.604764 | 0.551692 |
| 7 | 0 | -9.387479  | -5.693055 | 0.958642 |
| 6 | 0 | -11.954381 | 3.793714  | 1.192179 |
| 7 | 0 | -12.314597 | 4.803656  | 1.634742 |
| 6 | 0 | -11.954377 | -3.793696 | 1.192255 |
| 7 | 0 | -12.314591 | -4.803629 | 1.634838 |
| 6 | 0 | 11.954382  | -3.793700 | 1.192220 |
| 7 | 0 | 12.314599  | -4.803636 | 1.634795 |
| 6 | 0 | 11.954380  | 3.793709  | 1.192205 |
| 7 | 0 | 12.314595  | 4.803648  | 1.634776 |

**Sum-B5-Cor-CN2**

|   |   |            |           |           |
|---|---|------------|-----------|-----------|
| 6 | 0 | -10.093292 | -1.148402 | -0.430703 |
| 6 | 0 | -10.893582 | 0.000003  | -0.200743 |
| 6 | 0 | -10.093291 | 1.148405  | -0.430702 |
| 6 | 0 | -8.800813  | 0.718815  | -0.806383 |
| 6 | 0 | -8.800813  | -0.718811 | -0.806382 |
| 6 | 0 | -10.363568 | -2.379587 | 0.147911  |
| 6 | 0 | -12.005706 | 0.000002  | 0.624762  |
| 6 | 0 | -10.363565 | 2.379591  | 0.147917  |
| 6 | 0 | -7.670554  | 1.488972  | -0.641616 |
| 6 | 0 | -7.670555  | -1.488971 | -0.641616 |
| 6 | 0 | -11.630476 | -2.453013 | 0.849624  |
| 6 | 0 | -12.410927 | -1.320577 | 1.075314  |
| 6 | 0 | -12.410924 | 1.320579  | 1.075321  |
| 6 | 0 | -11.630472 | 2.453015  | 0.849633  |
| 6 | 0 | -9.218470  | 3.275836  | 0.162961  |
| 6 | 0 | -7.929624  | 2.835645  | -0.211864 |
| 6 | 0 | -7.929627  | -2.835644 | -0.211867 |
| 6 | 0 | -9.218475  | -3.275836 | 0.162955  |
| 1 | 0 | -13.308466 | -1.425290 | 1.677602  |
| 1 | 0 | -13.308463 | 1.425292  | 1.677609  |
| 1 | 0 | -7.110632  | 3.534930  | -0.082016 |
| 1 | 0 | -7.110636  | -3.534930 | -0.082021 |
| 6 | 0 | 11.156305  | -2.526340 | 0.986664  |
| 6 | 0 | 10.006210  | -3.254015 | 0.502320  |
| 6 | 0 | 11.408689  | -1.216941 | 0.559077  |
| 6 | 0 | 9.102523   | -2.660069 | -0.412115 |
| 6 | 0 | 12.181759  | 0.000000  | 1.156971  |
| 6 | 0 | 10.574666  | -0.718478 | -0.451558 |
| 6 | 0 | 7.598892   | -2.864226 | -0.749195 |
| 6 | 0 | 9.468879   | -1.411209 | -0.917275 |
| 6 | 0 | 11.408690  | 1.216939  | 0.559071  |
| 1 | 0 | 13.240508  | 0.000000  | 0.864498  |
| 1 | 0 | 12.149510  | 0.000003  | 2.251732  |
| 6 | 0 | 10.574667  | 0.718474  | -0.451561 |
| 6 | 0 | 7.175303   | -1.457427 | -1.269096 |
| 1 | 0 | 7.441762   | -3.657612 | -1.492962 |
| 1 | 0 | 7.031661   | -3.151844 | 0.143955  |
| 6 | 0 | 8.314469   | -0.708904 | -1.422503 |
| 6 | 0 | 11.156310  | 2.526343  | 0.986653  |
| 6 | 0 | 9.468880   | 1.411203  | -0.917280 |
| 6 | 0 | 8.314470   | 0.708898  | -1.422504 |
| 6 | 0 | 10.006214  | 3.254016  | 0.502306  |
| 6 | 0 | 9.102525   | 2.660065  | -0.412123 |
| 6 | 0 | 7.175304   | 1.457421  | -1.269099 |

|   |   |            |           |           |
|---|---|------------|-----------|-----------|
| 6 | 0 | 7.598894   | 2.864221  | -0.749202 |
| 1 | 0 | 7.441763   | 3.657605  | -1.492971 |
| 1 | 0 | 7.031663   | 3.151843  | 0.143948  |
| 6 | 0 | 5.909663   | 0.753041  | -1.298797 |
| 6 | 0 | 4.688456   | 1.412340  | -1.239859 |
| 6 | 0 | 5.909663   | -0.753046 | -1.298795 |
| 6 | 0 | 3.443081   | 0.730159  | -1.188994 |
| 1 | 0 | 4.675686   | 2.498820  | -1.242672 |
| 6 | 0 | 4.688455   | -1.412344 | -1.239856 |
| 6 | 0 | 3.443081   | -0.730161 | -1.188993 |
| 6 | 0 | 2.221904   | 1.413141  | -1.139117 |
| 6 | 0 | 4.675685   | -2.498824 | -1.242667 |
| 6 | 0 | 2.221902   | -1.413143 | -1.139114 |
| 6 | 0 | 0.987009   | 0.732045  | -1.085590 |
| 1 | 0 | 2.222267   | 2.499932  | -1.140176 |
| 6 | 0 | 0.987009   | -0.732047 | -1.085589 |
| 1 | 0 | 2.222266   | -2.499934 | -1.140172 |
| 6 | 0 | -0.244551  | 1.413680  | -1.031076 |
| 6 | 0 | -0.244552  | -1.413680 | -1.031075 |
| 1 | 0 | -0.244475  | 2.500429  | -1.030743 |
| 6 | 0 | -1.469243  | 0.731839  | -0.975518 |
| 6 | 0 | -1.469243  | -0.731839 | -0.975516 |
| 1 | 0 | -0.244477  | -2.500430 | -1.030739 |
| 6 | 0 | -2.711365  | -1.413126 | -0.917919 |
| 6 | 0 | -3.922808  | -0.728482 | -0.858626 |
| 1 | 0 | -2.711873  | -2.499928 | -0.918510 |
| 6 | 0 | -3.922807  | 0.728483  | -0.858626 |
| 6 | 0 | -5.179725  | -1.407223 | -0.797289 |
| 6 | 0 | -2.711365  | 1.413126  | -0.917920 |
| 6 | 0 | -5.179725  | 1.407224  | -0.797289 |
| 6 | 0 | -6.388395  | -0.749408 | -0.742361 |
| 1 | 0 | -5.162574  | -2.493384 | -0.804848 |
| 1 | 0 | -2.711873  | 2.499929  | -0.918511 |
| 6 | 0 | -6.388394  | 0.749409  | -0.742360 |
| 1 | 0 | -5.162574  | 2.493385  | -0.804847 |
| 6 | 0 | 9.715307   | 4.529611  | 1.080160  |
| 7 | 0 | 9.463418   | 5.579226  | 1.544826  |
| 6 | 0 | 9.715303   | -4.529608 | 1.080176  |
| 7 | 0 | 9.463413   | -5.579222 | 1.544846  |
| 6 | 0 | -9.372893  | 4.605141  | 0.666841  |
| 7 | 0 | -9.524647  | 5.693596  | 1.083020  |
| 6 | 0 | -9.372898  | -4.605139 | 0.666830  |
| 7 | 0 | -9.524655  | -5.693596 | 1.083005  |
| 6 | 0 | -12.074303 | 3.793934  | 1.463268  |
| 7 | 0 | -12.408618 | 4.803978  | 1.925487  |
| 6 | 0 | -12.074311 | -3.793934 | 1.463255  |
| 7 | 0 | -12.408629 | -4.803978 | 1.925470  |
| 6 | 0 | 11.984820  | 3.184168  | 2.105776  |
| 7 | 0 | 12.608893  | 3.679673  | 2.948751  |
| 6 | 0 | 11.984816  | -3.184164 | 2.105788  |
| 7 | 0 | 12.608889  | -3.679667 | 2.948764  |

**Sum-B5-Sum-CN2**

|   |   |           |           |           |
|---|---|-----------|-----------|-----------|
| 6 | 0 | 12.329999 | 0.000002  | 1.378285  |
| 6 | 0 | 7.825020  | -2.863887 | -0.705123 |
| 6 | 0 | 7.825022  | 2.863886  | -0.705135 |
| 1 | 0 | 13.399617 | 0.000002  | 1.128358  |
| 1 | 0 | 12.254118 | 0.000005  | 2.470916  |
| 1 | 0 | 7.696613  | -3.658014 | -1.453582 |
| 1 | 0 | 7.223170  | -3.150201 | 0.165512  |
| 1 | 0 | 7.696615  | 3.658010  | -1.453598 |

|   |   |            |           |           |   |   |            |           |           |
|---|---|------------|-----------|-----------|---|---|------------|-----------|-----------|
| 1 | 0 | 7.223171   | 3.150205  | 0.165499  | 6 | 0 | 2.468247   | -1.413448 | -1.318476 |
| 6 | 0 | 10.787099  | -0.718560 | -0.291910 | 6 | 0 | 3.688961   | -0.730670 | -1.316282 |
| 6 | 0 | 9.700099   | -1.411070 | -0.800279 | 1 | 0 | 2.468663   | -2.500289 | -1.319560 |
| 6 | 0 | 9.700100   | 1.411067  | -0.800285 | 6 | 0 | 2.468248   | 1.413445  | -1.318481 |
| 6 | 0 | 10.787099  | 0.718559  | -0.291913 | 6 | 0 | 3.688961   | 0.730665  | -1.316285 |
| 6 | 0 | 8.566558   | 0.709096  | -1.350979 | 6 | 0 | 4.936514   | -1.412573 | -1.314918 |
| 6 | 0 | 8.566558   | -0.709100 | -1.350976 | 1 | 0 | 2.468664   | 2.500285  | -1.319569 |
| 6 | 0 | 11.581285  | -1.217009 | 0.750239  | 6 | 0 | 4.936514   | 1.412569  | -1.314923 |
| 6 | 0 | 9.314511   | -2.660127 | -0.309812 | 6 | 0 | 6.158435   | -0.753454 | -1.323534 |
| 6 | 0 | 9.314512   | 2.660127  | -0.309823 | 1 | 0 | 4.923825   | -2.499111 | -1.318172 |
| 6 | 0 | 11.581286  | 1.217012  | 0.750234  | 6 | 0 | 6.158435   | 0.753449  | -1.323537 |
| 6 | 0 | 7.422460   | 1.457467  | -1.242409 | 1 | 0 | 4.923826   | 2.499107  | -1.318180 |
| 6 | 0 | 7.422459   | -1.457470 | -1.242403 | 6 | 0 | 9.869833   | 4.530046  | 1.204347  |
| 6 | 0 | 11.312744  | -2.526682 | 1.167381  | 7 | 0 | 9.600622   | 5.580104  | 1.658242  |
| 6 | 0 | 10.182286  | -3.254112 | 0.638696  | 6 | 0 | 9.869832   | -4.530041 | 1.204364  |
| 6 | 0 | 10.182287  | 3.254115  | 0.638683  | 7 | 0 | 9.600620   | -5.580098 | 1.658263  |
| 6 | 0 | 11.312745  | 2.526686  | 1.167371  | 6 | 0 | -9.869829  | -4.530039 | 1.204333  |
| 6 | 0 | -7.422460  | -1.457471 | -1.242433 | 7 | 0 | -9.600615  | -5.580095 | 1.658234  |
| 6 | 0 | -7.825021  | -2.863889 | -0.705156 | 6 | 0 | -9.869831  | 4.530043  | 1.204313  |
| 6 | 0 | -8.566559  | -0.709102 | -1.351012 | 7 | 0 | -9.600618  | 5.580101  | 1.658209  |
| 6 | 0 | -7.422460  | 1.457465  | -1.242440 | 6 | 0 | -12.097789 | 3.184384  | 2.317440  |
| 1 | 0 | -7.696612  | -3.658016 | -1.453614 | 7 | 0 | -12.689120 | 3.679794  | 3.183752  |
| 1 | 0 | -7.223173  | -3.150202 | 0.165481  | 6 | 0 | -12.097787 | -3.184376 | 2.317454  |
| 6 | 0 | -9.314512  | -2.660128 | -0.309847 | 7 | 0 | -12.689118 | -3.679782 | 3.183767  |
| 6 | 0 | -9.700101  | -1.411071 | -0.800316 | 6 | 0 | 12.097790  | 3.184387  | 2.317472  |
| 6 | 0 | -8.566559  | 0.709095  | -1.351015 | 7 | 0 | 12.689122  | 3.679799  | 3.183782  |
| 6 | 0 | -7.825023  | 2.863885  | -0.705169 | 6 | 0 | 12.097788  | -3.184380 | 2.317485  |
| 6 | 0 | -10.182286 | -3.254112 | 0.638663  | 7 | 0 | 12.689121  | -3.679788 | 3.18379   |
| 6 | 0 | -10.787101 | -0.718562 | -0.291948 |   |   |            |           |           |
| 6 | 0 | -9.700102  | 1.411066  | -0.800323 |   |   |            |           |           |
| 1 | 0 | -7.696614  | 3.658009  | -1.453631 |   |   |            |           |           |
| 1 | 0 | -7.223175  | 3.150203  | 0.165466  |   |   |            |           |           |
| 6 | 0 | -9.314514  | 2.660125  | -0.309859 |   |   |            |           |           |
| 6 | 0 | -11.312743 | -2.526681 | 1.167348  |   |   |            |           |           |
| 6 | 0 | -10.787101 | 0.718558  | -0.291951 |   |   |            |           |           |
| 6 | 0 | -11.581286 | -1.217010 | 0.750203  |   |   |            |           |           |
| 6 | 0 | -10.182287 | 3.254113  | 0.638648  |   |   |            |           |           |
| 6 | 0 | -11.581286 | 1.217010  | 0.750198  |   |   |            |           |           |
| 6 | 0 | -12.329999 | 0.000002  | 1.378250  |   |   |            |           |           |
| 6 | 0 | -11.312745 | 2.526684  | 1.167337  |   |   |            |           |           |
| 1 | 0 | -13.399616 | 0.000001  | 1.128322  |   |   |            |           |           |
| 1 | 0 | -12.254119 | 0.000004  | 2.470881  |   |   |            |           |           |
| 6 | 0 | -6.158435  | -0.753454 | -1.323557 |   |   |            |           |           |
| 6 | 0 | -6.158435  | 0.753449  | -1.323560 |   |   |            |           |           |
| 6 | 0 | -4.936514  | -1.412574 | -1.314936 |   |   |            |           |           |
| 6 | 0 | -4.936514  | 1.412569  | -1.314942 |   |   |            |           |           |
| 6 | 0 | -3.688961  | -0.730670 | -1.316295 |   |   |            |           |           |
| 1 | 0 | -4.923825  | -2.499112 | -1.318190 |   |   |            |           |           |
| 6 | 0 | -3.688962  | 0.730665  | -1.316299 |   |   |            |           |           |
| 1 | 0 | -4.923826  | 2.499107  | -1.318201 |   |   |            |           |           |
| 6 | 0 | -2.468247  | -1.413449 | -1.318484 |   |   |            |           |           |
| 6 | 0 | -2.468247  | 1.413444  | -1.318491 |   |   |            |           |           |
| 6 | 0 | -1.229945  | -0.732774 | -1.318643 |   |   |            |           |           |
| 1 | 0 | -2.468663  | -2.500289 | -1.319568 |   |   |            |           |           |
| 6 | 0 | -1.229945  | 0.732770  | -1.318646 |   |   |            |           |           |
| 1 | 0 | -2.468664  | 2.500285  | -1.319580 |   |   |            |           |           |
| 6 | 0 | 0.000000   | -1.414124 | -1.318816 |   |   |            |           |           |
| 6 | 0 | 0.000000   | 1.414120  | -1.318823 |   |   |            |           |           |
| 6 | 0 | 1.229944   | -0.732773 | -1.318639 |   |   |            |           |           |
| 1 | 0 | 0.000000   | -2.500920 | -1.318615 |   |   |            |           |           |
| 6 | 0 | 1.229944   | 0.732770  | -1.318642 |   |   |            |           |           |
| 1 | 0 | 0.000000   | 2.500916  | -1.318626 |   |   |            |           |           |

**Table S2:** Total energy (in hartrees) of various acene fused buckybowls at B3LYP/6-31G(d) (TE1) and B3LYP/6-31G(d)//B3LYP/6-31G (TE2) level of theory. The difference between TE1 and TE2 ( $\Delta E$  in kcal/mol).

| Str.           | TE1          | TE2          | $\Delta E$ (TE1-TE2) |
|----------------|--------------|--------------|----------------------|
| Cor-B1-Cor     | -1611.352881 | -1611.352247 | 0.40                 |
| Sum-B1-Cor     | -1650.625587 | -1650.624833 | 0.47                 |
| Sum-B1-Sum     | -1689.895630 | -1689.894756 | 0.55                 |
| Cor-B2-Cor     | -1764.993991 | -1764.993312 | 0.43                 |
| Sum-B2-Cor     | -1804.263657 | -1804.262858 | 0.50                 |
| Sum-B2-Sum     | -1843.532046 | -1843.531121 | 0.58                 |
| Cor-B3-Cor     | -1918.631011 | -1918.630289 | 0.45                 |
| Sum-B3-Cor     | -1957.899221 | -1957.898376 | 0.53                 |
| Sum-B3-Sum     | -1997.166771 | -1997.165802 | 0.61                 |
| Cor-B4-Cor     | -2072.266099 | -2072.265336 | 0.48                 |
| Sum-B4-Cor     | -2111.533567 | -2111.532680 | 0.56                 |
| Sum-B4-Sum     | -2150.800669 | -2150.799658 | 0.63                 |
| Cor-B5-Cor     | -2225.900179 | -2225.899373 | 0.51                 |
| Sum-B5-Cor     | -2265.167251 | -2265.166322 | 0.58                 |
| Sum-B5-Sum     | -2304.434112 | -2304.433057 | 0.66                 |
| Cor-B5-Cor-F   | -2622.832243 | -2622.826578 | 3.55                 |
| Sum-B5-Cor-F   | -2662.099593 | -2662.093886 | 3.58                 |
| Sum-B5-Sum-F   | -2701.366719 | -2701.360963 | 3.61                 |
| Cor-B5-Cor-CN  | -2594.872983 | -2594.871140 | 1.16                 |
| Sum-B5-Cor-CN  | -2634.142508 | -2634.140537 | 1.24                 |
| Sum-B5-Sum-CN  | -2673.411727 | -2673.409624 | 1.32                 |
| Cor-B5-Cor-CN2 | -2963.808195 | -2963.806195 | 1.26                 |
| Sum-B5-Cor-CN2 | -3003.083514 | -3003.081514 | 1.26                 |
| Sum-B5-Sum-CN2 | -3042.358604 | -3042.356604 | 1.26                 |
| Cor-B1-Cor-B   | -1584.772715 | -1584.772061 | 0.41                 |
| Cor-B2-Cor-B   | -1738.413821 | -1738.413127 | 0.44                 |
| Cor-B3-Cor-B   | -1892.051249 | -1892.050515 | 0.46                 |
| Cor-B4-Cor-B   | -2045.687134 | -2045.686360 | 0.49                 |
| Cor-B5-Cor-B   | -2199.322136 | -2199.321322 | 0.51                 |
| Sum-B1-Cor-B   | -1624.052196 | -1624.051390 | 0.51                 |
| Sum-B1-Sum-B   | -1663.329180 | -1663.328226 | 0.60                 |
| Sum-B2-Cor-B   | -1777.690974 | -1777.690126 | 0.53                 |
| Sum-B2-Sum-B   | -1816.966243 | -1816.965246 | 0.63                 |
| Sum-B3-Cor-B   | -1931.327342 | -1931.326451 | 0.56                 |
| Sum-B3-Sum-B   | -1970.601433 | -1970.600393 | 0.65                 |
| Sum-B4-Cor-B   | -2084.968178 | -2084.967245 | 0.59                 |
| Sum-B4-Sum-B   | -2124.235668 | -2124.234582 | 0.68                 |
| Sum-B5-Cor-B   | -2238.601564 | -2238.600588 | 0.61                 |
| Sum-B5-Sum-B   | -2277.869289 | -2277.868162 | 0.71                 |
| Cor-B1-Cor-N   | -1644.539198 | -1644.538201 | 0.63                 |
| Cor-B2-Cor-N   | -1798.180387 | -1798.179187 | 0.75                 |
| Cor-B3-Cor-N   | -1951.818047 | -1951.816996 | 0.66                 |
| Cor-B4-Cor-N   | -2105.453906 | -2105.452822 | 0.68                 |
| Cor-B5-Cor-N   | -2259.088771 | -2259.087651 | 0.70                 |
| Sum-B1-Cor-N   | -1683.802088 | -1683.800938 | 0.72                 |
| Sum-B1-Sum-N   | -1723.061447 | -1723.060076 | 0.86                 |
| Sum-B2-Cor-N   | -1837.441393 | -1837.440214 | 0.74                 |
| Sum-B2-Sum-N   | -1876.701558 | -1876.700194 | 0.86                 |
| Sum-B3-Cor-N   | -1991.078706 | -1991.077494 | 0.76                 |
| Sum-B3-Sum-N   | -2030.339288 | -2030.337905 | 0.87                 |
| Sum-B4-Cor-N   | -2144.720697 | -2144.719419 | 0.80                 |
| Sum-B4-Sum-N   | -2183.975325 | -2183.973907 | 0.89                 |
| Sum-B5-Cor-N   | -2298.348430 | -2298.347121 | 0.82                 |
| Sum-B5-Sum-N   | -2337.610259 | -2337.608805 | 0.91                 |

**Table 2:** Total energy (in hartrees) at B3LYP/6-311+G(d)//B3LYP/6-31G (TE1) and B3LYP/6-311+G(d)//B3LYP/6-31G(d) (TE2) level of theory. The difference between TE1 and TE2 ( $\Delta E$  in kcal/mol).

| Str.       | TE1          | TE2          | $\Delta E$ (TE1-TE2) |
|------------|--------------|--------------|----------------------|
| Cor-B1-Cor | -1611.672863 | -1611.671771 | 0.69                 |
| Sum-B1-Cor | -1650.953624 | -1650.952334 | 0.81                 |
| Sum-B1-Sum | -1690.231686 | -1690.230201 | 0.93                 |
| Cor-B2-Cor | -1765.344041 | -1765.342864 | 0.74                 |
| Sum-B2-Cor | -1804.621803 | -1804.620455 | 0.85                 |
| Sum-B2-Sum | -1843.898086 | -1843.896724 | 0.85                 |
| Cor-B3-Cor | -1919.011185 | -1919.009934 | 0.78                 |
| Sum-B3-Cor | -1958.28751  | -1958.286052 | 0.92                 |
| Sum-B3-Sum | -1997.563126 | -1997.561464 | 1.04                 |
| Cor-B4-Cor | -2072.67636  | -2072.675087 | 0.80                 |
| Sum-B4-Cor | -2111.951943 | -2111.950402 | 0.97                 |
| Sum-B4-Sum | -2151.227135 | -2151.225389 | 1.10                 |
| Cor-B5-Cor | -2226.340554 | -2226.339142 | 0.89                 |
| Sum-B5-Cor | -2265.615775 | -2265.614181 | 1.00                 |
| Sum-B5-Sum | -2304.890681 | -2304.888881 | 1.13                 |
